# Supplementary material for: Genome-wide analysis of lncRNAs, miRNAs, and mRNAs forming a prognostic scoring system in esophageal squamous cell carcinoma
Source: PeerJ. 2020 Feb 10;8:e8368. doi: 10.7717/peerj.8368 (PMC7017795; doi:10.7717/peerj.8368)
Supplement: Table S1 [file peerj-08-8368-s002.xlsx]

## Sheet: LncRNA
The list of Differentially expressed lncRNA
lncRNA	logFC	logCPM	PValue	FDR
GHRL	-8.27489	4.98763	5.22e-150	8.99e-146
ALDOB	-9.58882	4.94214	1.03e-133	8.84e-130
FMO5	-5.66659	4.7881	1.07e-126	6.17e-123
SULT1C2	-8.02212	4.93783	2.47e-112	1.06e-108
VSIG1	-7.01889	6.03517	6.26e-111	2.16e-107
TRIM50	-9.0824	3.16791	1.39e-107	4e-104
CYSTM1	-4.57809	7.35796	8.56e-101	2.11e-97
SMIM24	-7.07419	3.54886	1.35e-89	2.91e-86
MFSD4A	-6.76895	6.90699	1.99e-74	3.82e-71
B3GAT1	-7.2043	4.3634	1.08e-71	1.86e-68
MYO1A	-6.31609	2.44055	4.74e-70	7.42e-67
CDHR5	-5.44882	3.54541	1.29e-64	1.85e-61
LGALS4	-6.52912	5.11635	6.41e-63	8.5e-60
TESC	-5.04384	3.22475	1.54e-61	1.89e-58
KCNQ1	-5.00832	6.26823	2.31e-61	2.66e-58
AC008268.1	-9.87808	-0.113801	2.85e-61	3.07e-58
MIR194-2HG	-5.7144	0.314746	1.61e-59	1.63e-56
DGKD	-3.21394	6.51138	8.8e-59	8.42e-56
GRIA4	-6.43721	1.7237	1.89e-58	1.71e-55
SLC1A2	-5.4486	3.30551	4.03e-58	3.47e-55
LINC00671	-6.49195	0.388106	2.04e-56	1.67e-53
SLC4A4	-5.62312	4.0883	3.54e-55	2.77e-52
CKMT2	-4.55267	2.44935	2.04e-54	1.53e-51
ACSM3	-4.46196	3.28882	4.16e-54	2.98e-51
CCKBR	-8.66366	3.53647	7.72e-54	5.32e-51
CAPN9	-6.58532	2.85295	1.33e-53	8.83e-51
ESRRG	-6.93296	4.79771	5.87e-53	3.75e-50
AC021218.1	-5.77806	0.690971	6.13e-52	3.77e-49
SLC26A7	-6.22911	2.66819	4.19e-51	2.49e-48
BCL2L15	-5.20384	2.50172	5.82e-50	3.34e-47
GPA33	-6.00058	2.18573	2.21e-49	1.23e-46
LINC00261	-9.18461	4.77635	4.9e-49	2.64e-46
A1CF	-5.58203	0.254037	9.5e-49	4.96e-46
FUT9	-8.71106	3.73559	1.33e-48	6.75e-46
AP004608.1	-7.64116	0.675323	1.41e-48	6.95e-46
TSPAN8	-6.85352	6.1483	2.34e-48	1.12e-45
MYRIP	-5.48493	3.23568	5.21e-48	2.42e-45
CNTD1	-3.24083	2.1371	1.03e-46	4.65e-44
HABP2	-5.37289	1.31978	1.44e-46	6.34e-44
SLC28A2	-6.77745	3.14581	2.33e-46	1.01e-43
ANGPTL3	-4.60079	1.50943	4.05e-44	1.7e-41
CTSE	-8.62615	7.19892	1.46e-43	5.97e-41
AL158206.1	-3.19428	3.98804	1.66e-43	6.66e-41
HNF1A	-6.0157	1.81821	2.11e-43	8.27e-41
CELF3	-4.89265	-0.883248	3.35e-43	1.28e-40
CHGA	-7.20319	4.87084	7.9e-43	2.96e-40
AC015908.3	-3.9136	-0.999623	1.41e-42	5.18e-40
GPR155	-3.91242	6.85945	3.96e-42	1.42e-39
TFF2	-9.7754	6.68792	6.3e-42	2.22e-39
EPS8L3	-6.82312	3.40196	1.43e-41	4.93e-39
ARHGDIG	-5.58524	1.50026	3.1e-41	1.05e-38
AQP4	-8.36683	4.16278	1.14e-40	3.72e-38
SIK2	-2.27705	6.96808	1.14e-40	3.72e-38
PSCA	-6.9228	8.72991	6.07e-40	1.94e-37
GC	-9.40416	2.33566	1.26e-39	3.95e-37
IQGAP2	-3.78888	5.64584	1.34e-39	4.14e-37
LINC00940	-6.46514	-1.25863	2.17e-39	6.57e-37
SLC41A2	-3.59886	4.58986	2.85e-39	8.48e-37
AC245595.1	-7.43973	-2.62047	4.93e-39	1.44e-36
SMPD3	-3.80805	4.20388	9.88e-39	2.84e-36
LINC02381	-3.74569	4.01222	1.43e-38	4.05e-36
NKX6-2	-6.53159	0.148691	5.63e-38	1.56e-35
C2orf72	-4.74506	2.79102	5.83e-38	1.59e-35
ARHGEF38	-3.83217	1.82209	2.94e-37	7.92e-35
DEPTOR	-3.58348	4.41625	6.04e-37	1.6e-34
PEBP4	-5.34884	0.588704	6.92e-37	1.81e-34
SLC44A4	-5.59582	5.79703	8.41e-37	2.16e-34
PNPLA7	-3.36033	3.69355	9.27e-37	2.35e-34
KL	-3.91999	2.25053	1.46e-36	3.64e-34
GPRC5C	-3.60952	6.48287	1.91e-36	4.71e-34
RGN	-4.27394	1.59263	2.47e-36	6e-34
SULT1C2P1	-6.78775	-0.70178	7.14e-36	1.71e-33
C9orf152	-5.399	3.9594	1.4e-35	3.3e-33
HMGCS2	-7.30196	4.77556	2.53e-35	5.88e-33
PRDM16	-4.44538	3.95707	2.76e-35	6.34e-33
AC091563.1	-4.0207	1.53183	4.62e-35	1.05e-32
AC004982.1	-4.04186	0.157571	8.45e-35	1.87e-32
CLCNKA	-5.39303	1.15978	8.48e-35	1.87e-32
ST8SIA3	-4.95304	-2.12073	2.4e-34	5.24e-32
SLC39A5	-4.95649	1.09877	1.84e-33	3.97e-31
PRR26	-3.71485	1.92758	4.59e-33	9.76e-31
LRRC31	-6.1028	1.76235	5.37e-33	1.13e-30
MUC13	-6.06041	5.32517	6.15e-33	1.28e-30
PLIN5	-4.47789	2.41863	7.26e-33	1.49e-30
RAB11FIP2	-2.08374	5.56174	7.68e-33	1.56e-30
LINC01105	-7.98156	1.04019	7.89e-33	1.58e-30
HID1	-3.5553	5.74358	8.26e-33	1.64e-30
PDIA2	-6.64565	4.94021	1.17e-32	2.3e-30
AC087477.2	-3.5793	0.64825	2.34e-32	4.53e-30
FGD4	-2.68956	6.25456	4.33e-32	8.29e-30
REPS2	-3.41027	4.76397	5.03e-32	9.52e-30
MAGI1	-2.4387	6.03865	5.86e-32	1.1e-29
AL590004.3	-5.11786	1.1294	6.21e-32	1.15e-29
F10	-3.04115	1.4134	2.86e-31	5.25e-29
SLC43A1	-3.38664	4.17975	3.11e-31	5.64e-29
TMEM238L	-5.42446	1.90271	5.12e-31	9.2e-29
CARNS1	-2.80039	2.48195	6.48e-31	1.15e-28
C4BPB	-5.02328	0.879595	6.7e-31	1.18e-28
CELA3B	-6.53992	-0.413373	7.14e-31	1.24e-28
ME3	-3.36761	3.34606	1.02e-30	1.75e-28
DUSP19	-2.64793	3.65587	1.32e-30	2.25e-28
AL031429.2	-4.94095	-1.54608	1.82e-30	3.07e-28
ENAM	-4.98323	0.473768	7.02e-30	1.17e-27
AHCYL2	-2.17001	6.13765	1.01e-29	1.68e-27
AVPR1B	-5.00272	-2.12053	1.12e-29	1.85e-27
SIDT2	-2.02381	6.63865	1.6e-29	2.6e-27
PIP5K1B	-4.08043	3.58239	2.22e-29	3.58e-27
LRRC2	-4.02465	0.746646	5.03e-29	8.02e-27
PM20D1	-3.80764	0.52013	6.04e-29	9.55e-27
ASXL3	-3.77958	1.12046	6.5e-29	1.02e-26
ADH4	-4.40728	-0.206382	6.57e-29	1.02e-26
ADAM28	-3.5723	5.02898	8.29e-29	1.28e-26
FXYD4	-6.11639	0.886152	1.34e-28	2.04e-26
TMEM82	-5.56657	-1.43471	1.62e-28	2.45e-26
AC091043.1	-6.61776	-2.19478	1.67e-28	2.5e-26
LINC01342	-4.69176	-1.292	1.86e-28	2.76e-26
OTC	-5.00405	-2.02991	1.91e-28	2.79e-26
LIFR	-3.58383	6.28838	2.28e-28	3.3e-26
GPD1	-3.62049	1.18329	2.83e-28	4.07e-26
AC004982.2	-3.41139	1.78375	3e-28	4.27e-26
FAM107B	-2.70501	6.45796	3.03e-28	4.27e-26
UNC5CL	-3.41178	2.46737	3.77e-28	5.28e-26
CA1	-4.6022	-0.981458	7.16e-28	9.87e-26
RAP1GAP	-3.27723	6.32394	8.9e-28	1.22e-25
AC139491.2	-4.61787	0.843801	1.6e-27	2.15e-25
DKFZP434K028	-4.10932	-2.36526	3.8e-27	5.08e-25
TPH1	-3.35693	1.05752	4.81e-27	6.38e-25
VSTM2A	-5.03837	-1.44708	5.12e-27	6.74e-25
KCNJ3	-4.85038	0.814028	5.9e-27	7.7e-25
ADH6	-3.65138	1.77607	7.58e-27	9.82e-25
AC103746.1	-3.18717	-1.53753	1.12e-26	1.44e-24
USH1C	-5.18598	3.12383	1.65e-26	2.11e-24
RFLNA	-4.53417	4.14099	1.74e-26	2.2e-24
NCMAP	-4.4264	1.84632	4.34e-26	5.46e-24
ACACB	-3.01404	5.46122	5.45e-26	6.8e-24
ITLN1	-5.82707	1.78188	5.55e-26	6.88e-24
AC011379.1	-3.15925	-0.616671	8.15e-26	1e-23
PLEKHA6	-3.53358	5.417	8.99e-26	1.1e-23
LEPR	-3.14121	5.69786	9.72e-26	1.18e-23
CADPS	-3.55805	0.966619	9.8e-26	1.18e-23
TMC5	-4.40888	5.09045	1.14e-25	1.37e-23
FABP1	-8.16257	2.4808	1.16e-25	1.38e-23
AC124067.4	-5.46803	-0.669911	1.4e-25	1.65e-23
GSTM5	-3.11434	1.88602	1.44e-25	1.69e-23
APLP1	-4.05493	4.72417	1.46e-25	1.7e-23
C8orf49	-5.35228	-0.134781	1.75e-25	2.03e-23
RORC	-4.46397	3.68673	1.84e-25	2.11e-23
AC064807.2	-3.59339	-1.74865	1.89e-25	2.16e-23
ITGA8	-4.19355	5.48115	2.17e-25	2.46e-23
ALDH6A1	-2.19531	5.93411	2.34e-25	2.63e-23
FER1L4	-3.33849	4.30257	2.63e-25	2.94e-23
MLPH	-3.97796	5.43578	4.43e-25	4.92e-23
MECOM	-2.88797	6.32898	1.12e-24	1.24e-22
RAB17	-3.78051	3.39413	1.8e-24	1.98e-22
FAM47E	-3.08567	0.720003	1.94e-24	2.11e-22
AC012409.1	-3.95329	-2.08493	2.89e-24	3.13e-22
PP7080	-2.52168	6.37188	6.58e-24	7.06e-22
LINC02411	-6.98118	-1.63187	6.6e-24	7.06e-22
NECTIN3	-3.28592	4.49126	7.42e-24	7.89e-22
AC027612.2	-6.86483	-0.0135326	1.1e-23	1.16e-21
SEMA4G	-2.76013	3.7401	1.21e-23	1.27e-21
TMPRSS2	-4.4216	6.1641	1.39e-23	1.45e-21
ARHGAP18	-2.1788	5.31404	1.66e-23	1.73e-21
SYTL2	-2.97485	5.1204	1.78e-23	1.84e-21
NEUROD1	-5.38959	-0.484148	1.87e-23	1.92e-21
KLF15	-3.97024	3.36757	2.16e-23	2.2e-21
SLC12A2	-2.53298	7.01108	3.68e-23	3.73e-21
PIGR	-6.02826	8.63034	4.4e-23	4.44e-21
C3orf86	-3.78205	-1.80381	9.02e-23	9.03e-21
KBTBD12	-4.25182	1.32238	1.27e-22	1.25e-20
TMEM100	-3.76114	0.894117	1.29e-22	1.27e-20
CYP3A5	-3.658	5.00112	1.67e-22	1.64e-20
PNLIPRP2	-6.42903	-0.304017	1.97e-22	1.92e-20
SH3GL2	-5.04422	1.81104	2.23e-22	2.16e-20
GMDS	-2.23455	5.72864	3.65e-22	3.51e-20
GCNT1	-2.80686	4.66728	3.84e-22	3.67e-20
ADGRD1	-3.85921	4.03734	4.5e-22	4.28e-20
LINC02038	-4.68924	-0.716096	4.94e-22	4.68e-20
SLC6A20	-3.97583	2.10451	5.62e-22	5.29e-20
NSG2	-4.27088	-0.674535	7.59e-22	7.1e-20
MUC1	-3.21933	7.89737	1.23e-21	1.15e-19
SERPINA1	-3.38904	6.56863	1.29e-21	1.19e-19
CREB3L1	-3.17983	6.94451	1.29e-21	1.19e-19
CACNA2D2	-2.79742	2.4615	1.3e-21	1.19e-19
AC020656.2	-4.39734	0.333008	1.45e-21	1.32e-19
LINC02532	-4.81202	0.752237	1.59e-21	1.44e-19
GBGT1	-2.98221	3.64603	2.22e-21	1.99e-19
AC007637.1	-3.20948	-0.300143	3.9e-21	3.47e-19
CLMN	-2.45379	5.27383	4.6e-21	4.06e-19
SCUBE2	-3.27316	4.01249	5.98e-21	5.25e-19
GALNTL6	-3.80623	-0.675402	6.3e-21	5.51e-19
SNTB1	-2.62559	5.07561	6.61e-21	5.75e-19
AC012485.2	-4.16782	-2.4432	7.53e-21	6.52e-19
AL139246.3	-3.29428	-1.52271	8.09e-21	6.93e-19
LINC01768	-5.03675	-2.92322	8.82e-21	7.52e-19
ABCC6P1	-4.28804	-1.09327	1.12e-20	9.49e-19
FAM174B	-2.55201	4.26263	1.12e-20	9.49e-19
KLHL41	-3.48319	-0.00241844	1.17e-20	9.82e-19
HIST2H2BA	-3.86373	-0.893159	1.44e-20	1.2e-18
ALB	-4.23159	0.432676	1.47e-20	1.22e-18
AC012409.3	-3.82374	-2.32985	1.51e-20	1.24e-18
LINC01978	-3.0693	-1.34359	2.12e-20	1.74e-18
ARSD	-2.02117	6.16433	2.19e-20	1.79e-18
PTPRJ	-2.14406	5.55472	3.52e-20	2.86e-18
PLEKHB1	-3.07688	3.00495	3.81e-20	3.08e-18
ADH1A	-3.77854	-0.697922	4.97e-20	3.98e-18
ADCY6	-2.04519	5.45269	6.8e-20	5.4e-18
COL2A1	-4.76145	4.38782	6.9e-20	5.45e-18
FMOD	-2.80749	6.96451	7.14e-20	5.62e-18
PGAM1P5	-2.66278	-1.0472	1.14e-19	8.94e-18
RBM47	-2.02903	7.70585	1.52e-19	1.19e-17
BX284668.2	-3.8018	-0.0929405	1.74e-19	1.35e-17
HIST2H2BB	-3.73324	-0.598469	1.77e-19	1.37e-17
BCL2L14	-3.40153	2.35191	1.88e-19	1.45e-17
LINC00365	-4.24635	1.30158	1.93e-19	1.48e-17
LINC00643	-4.48176	-2.36989	2.06e-19	1.57e-17
SLC16A7	-2.99644	5.74232	2.59e-19	1.97e-17
ANKRD40CL	-4.10999	-0.885585	3.09e-19	2.33e-17
ITIH3	-3.27028	0.597716	3.2e-19	2.41e-17
AC024337.2	-3.1369	-1.47631	3.36e-19	2.51e-17
FNDC5	-3.48874	2.62066	4.28e-19	3.19e-17
HNF4G	-3.57284	3.07312	4.58e-19	3.39e-17
ZNF385B	-3.96833	2.85559	4.59e-19	3.39e-17
RAB3C	-3.77294	1.20054	5.42e-19	3.99e-17
AC009407.1	-3.37808	-2.63731	7.16e-19	5.25e-17
ATP8B1	-2.11464	7.64527	9.99e-19	7.26e-17
PCAT18	-5.47488	-0.318719	1.17e-18	8.5e-17
PGCP1	-6.23856	-2.04926	1.2e-18	8.68e-17
MIR29B2CHG	-2.90907	3.33909	1.28e-18	9.17e-17
ANG	-2.50944	2.5811	1.31e-18	9.39e-17
AC023794.3	-2.95946	-0.0639749	1.47e-18	1.05e-16
RFX6	-4.62686	-0.661054	1.5e-18	1.06e-16
SELENBP1	-3.2804	5.48395	1.83e-18	1.29e-16
ARSE	-3.08675	1.5322	1.88e-18	1.32e-16
ITIH5	-3.08923	5.33696	2.24e-18	1.56e-16
AL590438.1	-3.21999	-1.40228	2.64e-18	1.83e-16
CFAP221	-3.93114	0.321784	3.15e-18	2.17e-16
AP003037.1	-7.07776	-2.9243	3.44e-18	2.36e-16
HPN	-4.97244	3.27763	4.18e-18	2.86e-16
SHROOM3	-2.77046	7.05127	4.28e-18	2.92e-16
LHFPL3-AS2	-3.92038	0.329568	4.59e-18	3.12e-16
AATK	-2.27095	3.50366	4.96e-18	3.35e-16
ATP7B	-2.32435	3.81697	4.98e-18	3.35e-16
AL139275.2	-5.84909	-2.49293	8.89e-18	5.96e-16
NTN4	-2.37844	5.28212	9.28e-18	6.2e-16
MUSK	-2.84399	0.471248	1.01e-17	6.73e-16
PIK3C2G	-3.98347	4.32364	1.12e-17	7.43e-16
LPIN2	-2.1077	6.06135	1.17e-17	7.72e-16
TMEM220	-2.19127	2.8651	1.28e-17	8.42e-16
SRRM4	-3.46139	-1.34633	1.42e-17	9.32e-16
C6orf201	-2.33234	-0.813959	1.46e-17	9.55e-16
FAM189A2	-3.3319	3.04848	1.49e-17	9.69e-16
GOLM1	-2.37796	7.38188	1.67e-17	1.08e-15
CFTR	-3.97677	2.80991	3.23e-17	2.07e-15
RGL3	-3.56003	2.69827	3.26e-17	2.08e-15
PDE1B	-2.65088	2.4471	4.17e-17	2.65e-15
FAM19A2	-2.61483	1.18814	4.33e-17	2.74e-15
FAM107A	-3.61114	4.01948	4.38e-17	2.77e-15
CAB39L	-2.31711	4.58192	4.65e-17	2.91e-15
VAT1L	-2.58718	1.29361	5.64e-17	3.51e-15
TRIM36	-2.54602	2.51369	6.72e-17	4.15e-15
C6	-5.20285	0.82218	8.5e-17	5.21e-15
GOLT1A	-3.99717	0.452292	8.78e-17	5.36e-15
ZBED3	-2.08312	4.66441	1.2e-16	7.31e-15
BIRC5	2.89368	6.31558	1.53e-16	9.28e-15
CNTN3	-3.80946	1.07237	1.74e-16	1.05e-14
SORBS2	-3.09265	5.28556	1.75e-16	1.05e-14
TRIP13	3.03557	6.14173	1.92e-16	1.15e-14
SP5	-3.67018	1.35077	1.95e-16	1.16e-14
GMPR	-2.80133	3.0275	2.04e-16	1.21e-14
CHRNA7	-3.101	1.16377	2.13e-16	1.26e-14
RETREG1	-2.53225	4.36967	2.3e-16	1.36e-14
ANPEP	-3.4149	6.47078	2.54e-16	1.5e-14
DDAH1	-2.51219	5.72489	2.65e-16	1.55e-14
SLC44A3	-2.51066	3.86707	3.24e-16	1.89e-14
AC023794.2	-3.38933	-1.35523	3.44e-16	2e-14
PKIB	-2.94916	3.08696	3.47e-16	2.01e-14
MAGIX	-2.13291	2.5061	3.64e-16	2.1e-14
AC018926.3	-2.21196	-1.14841	3.95e-16	2.27e-14
SLC16A10	-2.55471	3.44057	4.29e-16	2.46e-14
KCNH7	-3.04625	-1.78716	4.64e-16	2.66e-14
MMP11	6.07734	8.09488	4.7e-16	2.68e-14
AC139749.1	-4.29406	0.696755	5.03e-16	2.86e-14
ARHGAP44	-2.26187	3.52891	5.29e-16	3e-14
CKS1B	2.12291	5.97179	5.94e-16	3.35e-14
DNALI1	-2.8177	2.31233	6.19e-16	3.49e-14
CRYZL2P	-2.19238	4.36989	6.89e-16	3.87e-14
KALRN	-2.23854	5.04552	7.19e-16	4.02e-14
LAMA2	-2.55457	5.59211	7.6e-16	4.22e-14
AZGP1	-4.74209	5.28268	7.61e-16	4.22e-14
LINC02106	-4.86217	-3.3568	8.4e-16	4.64e-14
RHPN2	-2.42784	4.79605	8.5e-16	4.68e-14
PLAU	3.92321	8.31463	8.96e-16	4.92e-14
PLLP	-2.3332	5.3747	9.23e-16	5.05e-14
NRM	2.12654	5.88096	1e-15	5.47e-14
GALNT12	-2.24007	4.94603	1.01e-15	5.5e-14
2019-03-02	-2.2867	3.85805	1.13e-15	6.1e-14
GLYATL1	-3.32003	-0.26842	1.21e-15	6.55e-14
AL034347.1	-3.49801	-2.43474	1.29e-15	6.96e-14
ROR1	-2.70173	4.21555	1.37e-15	7.35e-14
SYT4	-4.94832	-0.967761	1.57e-15	8.38e-14
ST6GALNAC1	-3.39342	5.12156	1.74e-15	9.24e-14
LINC01783	-3.20843	-1.92079	2.75e-15	1.46e-13
NME5	-3.06369	-0.544028	3e-15	1.59e-13
CNDP1	-2.91122	-1.08016	3.13e-15	1.65e-13
AC239798.4	-3.38129	-1.69564	3.25e-15	1.7e-13
KIF23	2.35225	6.18058	3.62e-15	1.89e-13
AC084026.2	-3.68402	-2.59508	3.86e-15	2e-13
LRIG1	-2.15725	7.26454	4.04e-15	2.09e-13
C2orf40	-4.39872	3.2411	4.09e-15	2.11e-13
LCN6	-3.56947	-1.21838	4.14e-15	2.13e-13
TRIM73	-2.18084	0.13345	4.33e-15	2.22e-13
VEGFD	-2.91219	1.14662	4.65e-15	2.37e-13
SYNPR	-3.6829	-1.52441	4.74e-15	2.41e-13
ORM1	-4.71025	-1.00791	6e-15	3.04e-13
ZNF540	-2.47145	0.780291	6.24e-15	3.15e-13
FABP3	-2.4036	2.82284	6.3e-15	3.18e-13
SYNE1	-2.42449	6.16195	6.38e-15	3.2e-13
AL162511.1	-4.05597	-2.6946	6.42e-15	3.22e-13
GPR17	-2.93477	0.652763	6.45e-15	3.22e-13
ARHGAP6	-2.49834	2.69963	7.1e-15	3.54e-13
AC022031.2	4.87909	1.32768	7.83e-15	3.89e-13
NUDT1	2.27799	4.93698	8.06e-15	3.99e-13
GLOD5	-3.39871	-1.89053	8.13e-15	4.01e-13
ORC6	2.3204	4.54421	8.86e-15	4.36e-13
WNK4	-3.33637	3.37674	8.95e-15	4.38e-13
MST1L	-2.67989	1.74269	8.95e-15	4.38e-13
C15orf65	-2.06125	0.71766	9.69e-15	4.73e-13
UBE2S	2.33983	6.62749	1.12e-14	5.43e-13
RECQL4	2.22109	6.14615	1.15e-14	5.58e-13
CYFIP2	-2.70456	5.6954	1.2e-14	5.79e-13
C1QTNF7	-3.07938	1.52035	1.24e-14	5.96e-13
TDO2	3.84052	2.95219	1.7e-14	8.12e-13
KCNJ10	-2.67291	0.333014	1.93e-14	9.2e-13
NUF2	2.68875	5.06195	1.94e-14	9.25e-13
PTPRB	-2.02714	5.06704	2.05e-14	9.73e-13
DNAJC22	-3.04513	2.82308	2.26e-14	1.07e-12
C3orf18	-2.20268	2.36453	2.27e-14	1.07e-12
GATM	-2.64419	5.91313	2.31e-14	1.09e-12
MIR4435-2HG	2.34681	5.11571	2.65e-14	1.24e-12
LINC01980	6.21394	3.1833	2.81e-14	1.31e-12
TRPM3	-3.2609	0.146298	2.9e-14	1.35e-12
SLC18A1	-2.8897	-1.82527	3.31e-14	1.54e-12
MASP1	-3.14326	2.45658	3.82e-14	1.77e-12
KIF2C	2.31062	6.13094	4.11e-14	1.9e-12
CHRM2	-3.65195	0.981976	4.22e-14	1.94e-12
SYBU	-3.01441	4.34878	5.04e-14	2.3e-12
DNER	-3.75696	4.19245	5.11e-14	2.33e-12
ABCC12	-4.06275	-2.02483	5.92e-14	2.69e-12
HEPACAM2	-3.92553	0.636362	6.11e-14	2.76e-12
MTBP	2.01956	4.35875	6.95e-14	3.13e-12
AP005717.1	-2.69095	-1.89844	9.3e-14	4.16e-12
ICA1	-2.75547	4.07046	9.45e-14	4.22e-12
TMEM125	-2.62841	3.35108	9.51e-14	4.24e-12
MFAP2	3.62167	5.79849	1.09e-13	4.82e-12
SLC1A1	-2.52587	3.71992	1.12e-13	4.95e-12
AC007405.1	-3.39538	-0.528618	1.13e-13	4.97e-12
FRMD3	-2.31951	2.22145	1.17e-13	5.17e-12
ABCC6	-2.14191	2.8293	1.47e-13	6.44e-12
ZBTB16	-3.88341	4.42082	1.47e-13	6.44e-12
AC007849.1	-2.77304	-0.0467293	1.48e-13	6.44e-12
FRMD1	-5.11123	3.3764	1.52e-13	6.61e-12
ERBB4	-3.83702	0.880736	1.78e-13	7.73e-12
MMEL1	-2.63032	-0.0292553	1.8e-13	7.81e-12
AC005920.1	-3.45191	-2.62247	1.85e-13	7.97e-12
AC127526.2	-3.39496	-1.40555	1.94e-13	8.37e-12
LINC01996	-3.76289	-2.39002	2.01e-13	8.63e-12
GPR160	-2.36114	4.5019	2.3e-13	9.82e-12
PTPRH	-3.06448	4.45492	2.42e-13	1.03e-11
VWA5B1	-3.47651	-1.44056	2.54e-13	1.08e-11
AL590426.2	-5.61283	-3.60049	2.67e-13	1.13e-11
AC084262.1	-4.33926	-2.83945	3.17e-13	1.34e-11
HNMT	-2.04074	4.1643	3.4e-13	1.43e-11
HGD	-4.16151	2.79361	3.51e-13	1.47e-11
AC022031.1	6.88237	-1.55072	3.7e-13	1.54e-11
PKMYT1	2.73075	6.19651	3.72e-13	1.54e-11
ABCC8	-4.44317	1.15992	3.91e-13	1.61e-11
KCNJ11	-3.09048	2.18391	3.95e-13	1.63e-11
PRKN	-2.21756	2.10941	4.01e-13	1.65e-11
ATOH8	-2.79664	2.43391	4.12e-13	1.69e-11
FAM221A	-2.2834	3.43923	4.14e-13	1.7e-11
AC134312.5	5.06686	0.609469	4.38e-13	1.79e-11
FAM149A	-2.59527	3.04937	4.42e-13	1.79e-11
RGS5	-2.28156	7.64183	4.42e-13	1.79e-11
SLC40A1	-2.34116	7.01521	4.61e-13	1.86e-11
AL354872.2	-2.60739	-1.87411	4.68e-13	1.89e-11
GDF9	-2.12189	0.449351	4.78e-13	1.93e-11
AC024337.1	-5.03783	-3.32625	4.86e-13	1.95e-11
KAZALD1	-2.02417	2.83547	5.1e-13	2.04e-11
PARD3B	-2.18997	4.37787	5.49e-13	2.19e-11
NR3C2	-2.91648	3.56881	6.07e-13	2.41e-11
CFAP99	-2.25968	-1.87894	6.44e-13	2.55e-11
GPRC5B	-2.19008	5.02821	6.67e-13	2.63e-11
PIFO	-2.79908	1.37171	6.9e-13	2.71e-11
ADAM12	4.64865	6.5268	7.83e-13	3.07e-11
MT1JP	-3.33244	-2.42286	8e-13	3.14e-11
MT1F	-2.42165	4.49518	8.53e-13	3.33e-11
AC130456.2	-4.32837	-1.49605	8.89e-13	3.47e-11
AC239798.2	-3.25419	-1.07758	1e-12	3.9e-11
LAMP3	3.76494	6.49213	1.03e-12	4e-11
CENPA	2.63279	4.4482	1.06e-12	4.1e-11
CLEC3B	-2.95286	2.42209	1.1e-12	4.24e-11
CDK1	2.14543	6.62253	1.13e-12	4.35e-11
CDC45	2.64986	5.09851	1.14e-12	4.35e-11
SLC5A9	-2.83136	0.333695	1.15e-12	4.39e-11
KRT89P	-2.83027	-2.44082	1.19e-12	4.53e-11
STMN1	2.25764	8.18853	1.22e-12	4.65e-11
U62317.4	4.16851	-0.928198	1.3e-12	4.92e-11
LINC00930	-3.08879	-2.05356	1.33e-12	5e-11
ADAM33	-2.43118	3.31179	1.41e-12	5.28e-11
CDKN3	2.54971	4.86334	1.44e-12	5.4e-11
AC244453.1	-3.23238	-2.94878	1.45e-12	5.42e-11
CDC20	2.51717	6.80241	1.56e-12	5.81e-11
CDH24	2.1779	5.31044	1.75e-12	6.49e-11
AR	-2.49851	2.73082	1.8e-12	6.64e-11
CYMP	-3.99741	-2.77332	1.88e-12	6.94e-11
LONRF3	-2.59209	2.18446	1.97e-12	7.27e-11
AGR2	-3.67235	7.89885	1.99e-12	7.31e-11
AOX1	-3.0843	3.65308	2.01e-12	7.37e-11
RERGL	-2.84974	-0.213851	2.03e-12	7.41e-11
RNF126P1	-2.43537	-0.99382	2.16e-12	7.86e-11
AC021491.4	-2.49747	-1.72485	2.17e-12	7.88e-11
AC129492.2	-4.61549	-1.85796	2.21e-12	7.99e-11
AC008808.2	-4.50994	-2.8853	2.31e-12	8.3e-11
NEK2	2.41324	5.15289	2.66e-12	9.52e-11
SNX29P2	-3.00128	-3.01253	2.94e-12	1.05e-10
AC016735.1	-3.12754	-2.49884	3.09e-12	1.1e-10
B3GNT7	-2.2818	5.00673	3.17e-12	1.13e-10
PRC1	2.00264	6.84585	3.52e-12	1.25e-10
UBE2C	2.49627	6.58235	3.62e-12	1.28e-10
AC005186.1	-4.52462	-2.5251	3.65e-12	1.29e-10
ANO5	-3.13088	2.89533	4.1e-12	1.44e-10
DEPDC1B	2.20994	4.7411	4.96e-12	1.74e-10
WDR72	3.33025	6.56471	5.22e-12	1.82e-10
SMPDL3B	-2.88913	3.26486	5.46e-12	1.9e-10
AC015908.2	-3.47968	-2.6819	5.71e-12	1.98e-10
LY6E	2.54755	9.20254	5.74e-12	1.99e-10
SGSM1	-2.62141	2.1703	5.77e-12	1.99e-10
AC091057.3	-2.27384	-2.63225	6.06e-12	2.09e-10
ERVE-1	-2.70835	0.917897	6.08e-12	2.09e-10
GCNT3	-3.18401	4.80039	6.11e-12	2.1e-10
NUSAP1	2.20591	6.75868	6.15e-12	2.11e-10
RAD54L	2.25052	4.34167	6.25e-12	2.13e-10
KIAA1324	-3.42728	7.12257	6.56e-12	2.23e-10
KIF4A	2.31803	5.80232	6.93e-12	2.35e-10
OGN	-3.10509	4.52277	6.99e-12	2.37e-10
EXO1	2.51006	5.04946	7.29e-12	2.45e-10
TJP3	-2.95089	5.04957	7.37e-12	2.48e-10
CYMP-AS1	-3.99993	-2.69645	7.43e-12	2.49e-10
AC087269.1	-3.53203	-2.6119	7.47e-12	2.5e-10
MIR2052HG	3.85013	0.331703	7.63e-12	2.55e-10
DTL	2.33962	5.99449	8.14e-12	2.7e-10
CENPE	2.14192	6.01464	8.73e-12	2.89e-10
AC016395.1	-3.75458	-2.91729	8.97e-12	2.97e-10
CKAP2L	2.52641	5.51131	1.04e-11	3.42e-10
ANXA13	-2.74997	0.191389	1.05e-11	3.42e-10
AL139383.1	-2.31356	-1.38219	1.05e-11	3.42e-10
CYTOR	2.25603	4.15188	1.13e-11	3.67e-10
CHRFAM7A	-2.38509	-0.596346	1.21e-11	3.94e-10
AC091544.4	-2.97294	-0.908904	1.24e-11	4.01e-10
NTF4	2.89515	2.30806	1.27e-11	4.1e-10
GINS1	2.17169	5.46428	1.3e-11	4.18e-10
GABRA3	4.57854	3.49246	1.45e-11	4.64e-10
LINC02157	-3.62533	-3.33618	1.46e-11	4.69e-10
RASSF6	-2.61316	5.48096	1.49e-11	4.76e-10
U62317.1	4.47665	2.61753	1.64e-11	5.21e-10
LINC01124	-3.24843	-0.296592	1.93e-11	6.08e-10
GRAMD1B	-2.94908	4.31319	1.94e-11	6.1e-10
GAU1	-2.83937	-1.64703	2.31e-11	7.24e-10
CDHR3	-2.43758	2.98492	2.51e-11	7.87e-10
SEMA3B	-2.40009	5.13542	2.55e-11	7.96e-10
COL14A1	-2.49947	6.2876	2.72e-11	8.48e-10
ANLN	2.54927	7.71176	2.75e-11	8.56e-10
CENPF	2.35644	7.97514	2.84e-11	8.82e-10
XRCC2	2.30362	4.44929	3.39e-11	1.04e-09
PROM1	-3.70418	4.82045	3.56e-11	1.09e-09
TTLL6	-3.39804	-0.383323	3.61e-11	1.1e-09
SLAIN1	-2.54586	2.44148	3.77e-11	1.15e-09
SPP1	6.02734	9.14169	3.79e-11	1.16e-09
CIP2A	2.30696	5.05402	3.83e-11	1.17e-09
ENPP1	-2.22521	3.68394	3.84e-11	1.17e-09
SNX10	2.49768	5.51865	3.88e-11	1.18e-09
BUB1B	2.15684	5.93928	4.01e-11	1.22e-09
CUX2	-3.76442	2.12278	4.25e-11	1.28e-09
SLC9A2	-3.08241	4.94207	4.64e-11	1.39e-09
GALR1	-3.25312	-1.46593	4.89e-11	1.46e-09
TSSC2	-2.41689	1.14767	5.27e-11	1.57e-09
SMIM11A	-2.40198	-2.84765	5.39e-11	1.6e-09
INPP5J	-2.06183	3.39363	5.44e-11	1.61e-09
AC124312.2	-2.55756	-1.33965	5.87e-11	1.73e-09
CD300LG	-3.22923	-0.692499	5.91e-11	1.74e-09
ARX	-3.38566	-0.946067	6.14e-11	1.8e-09
LINC01597	-2.5854	-0.888505	6.33e-11	1.86e-09
TMEM56	-2.33513	4.21511	6.37e-11	1.86e-09
LINC02435	-3.41993	-2.61682	6.63e-11	1.93e-09
PVT1	2.19717	5.18955	6.83e-11	1.98e-09
C9orf106	-2.56746	-0.865356	7.44e-11	2.15e-09
AC087477.5	-2.52551	-3.37194	7.49e-11	2.16e-09
PTTG1	2.27925	6.15093	7.52e-11	2.17e-09
AC130456.1	-3.72003	-2.39242	7.59e-11	2.18e-09
SHCBP1	2.09253	5.04068	7.61e-11	2.18e-09
SYPL2	-2.26513	0.801703	7.76e-11	2.22e-09
CDCA3	2.03144	5.22288	7.77e-11	2.22e-09
CPED1	-2.47451	4.3737	8.68e-11	2.47e-09
ADAMTS12	4.00612	5.92746	9.69e-11	2.75e-09
LINC00967	-3.88569	-3.73995	1.02e-10	2.88e-09
PROCA1	-2.1225	2.30242	1.02e-10	2.88e-09
CGNL1	-2.67022	5.37631	1.03e-10	2.89e-09
BUB1	2.2008	6.15168	1.13e-10	3.17e-09
ABI3BP	-2.95584	5.86291	1.21e-10	3.4e-09
AC124312.3	-2.76266	-0.876126	1.25e-10	3.5e-09
MCM2	2.38728	7.61396	1.45e-10	4.05e-09
ARSEP1	-3.19648	-2.66961	1.46e-10	4.07e-09
AC012236.1	-2.33675	0.618714	1.54e-10	4.27e-09
AC104041.1	3.03463	1.5407	1.6e-10	4.43e-09
NMUR2	-3.57515	0.23986	1.64e-10	4.53e-09
HOXD10	4.44292	4.8194	1.71e-10	4.7e-09
SLC7A14	-3.36931	-0.606325	1.81e-10	4.96e-09
PDE2A	-2.08419	3.76803	1.81e-10	4.96e-09
AL365356.5	5.24323	1.77512	1.85e-10	5.04e-09
THRB-IT1	-2.33576	-0.85541	1.86e-10	5.06e-09
FOXM1	2.45629	7.67123	1.96e-10	5.32e-09
SLC4A1	-2.81799	-0.881429	2.01e-10	5.46e-09
COL11A1	6.87672	6.75524	2.07e-10	5.62e-09
PACSIN1	-2.61499	1.33164	2.14e-10	5.78e-09
DUXAP10	3.66747	2.52726	2.17e-10	5.85e-09
HSD3B2	-3.53759	-2.80817	2.45e-10	6.57e-09
CEP55	2.32073	6.52838	2.45e-10	6.58e-09
ADRA1A	-3.11382	-0.718187	2.48e-10	6.65e-09
CARTPT	-4.08332	-0.710345	2.61e-10	6.95e-09
LINC01943	2.46634	0.176213	2.62e-10	6.97e-09
EN1	6.15249	4.8259	2.64e-10	7e-09
AL135999.3	-4.04186	-2.67423	2.75e-10	7.28e-09
AC009093.6	-2.18154	-2.10644	2.89e-10	7.6e-09
HOXD11	4.63767	3.59432	3.11e-10	8.17e-09
CADM2	-3.4431	2.30799	3.11e-10	8.17e-09
NPR1	-2.18197	3.39659	3.13e-10	8.2e-09
AC241377.2	-2.94109	-3.62235	3.35e-10	8.7e-09
DDIAS	2.50023	4.9114	3.67e-10	9.52e-09
MACROD2	-2.1502	1.72505	3.75e-10	9.71e-09
AL121895.2	-2.45597	-0.69122	3.8e-10	9.81e-09
AL049838.1	-2.12094	0.616589	4.24e-10	1.09e-08
PCDH11Y	-3.22482	-2.24959	4.58e-10	1.17e-08
AC010329.1	-3.47237	0.113177	4.61e-10	1.18e-08
ESM1	3.50551	2.84504	4.76e-10	1.22e-08
COBL	-2.67112	5.61064	4.91e-10	1.25e-08
HIF3A	-3.01029	4.15193	4.96e-10	1.26e-08
MYO5C	-2.05953	5.57109	5.01e-10	1.27e-08
COL7A1	3.0209	9.25832	5.05e-10	1.28e-08
MELK	2.28952	5.86627	5.37e-10	1.35e-08
AKR1C7P	5.95336	1.50932	5.68e-10	1.42e-08
LINC01633	3.85645	-0.909756	5.87e-10	1.46e-08
SIX1	3.44765	4.22253	5.97e-10	1.49e-08
DUSP9	3.93064	3.58197	6.27e-10	1.56e-08
MUC2	-4.49173	5.16543	6.29e-10	1.56e-08
AC078906.1	-2.89979	-1.1959	7.06e-10	1.73e-08
AMPD1	-2.8449	-1.16398	7.37e-10	1.81e-08
CDH3	3.19421	9.29148	7.77e-10	1.9e-08
COL4A3	-2.7508	2.42567	7.92e-10	1.93e-08
AC004147.4	-3.14778	-2.54358	8.07e-10	1.96e-08
TMPRSS3	-2.83139	2.59184	8.43e-10	2.04e-08
AC002546.1	-2.93873	-2.57492	8.43e-10	2.04e-08
MYOSLID	4.27793	2.76209	8.68e-10	2.1e-08
PKDCC	-2.6396	4.67399	9.25e-10	2.23e-08
ALOX12P2	2.7371	4.31667	9.43e-10	2.27e-08
PLCZ1	-2.83918	-0.610383	9.78e-10	2.35e-08
AP003117.1	-2.23197	-2.8269	1.08e-09	2.56e-08
AC025280.1	-2.5077	-2.45906	1.08e-09	2.57e-08
AC006305.1	3.45292	1.80301	1.09e-09	2.59e-08
NXPH4	3.76908	5.87849	1.17e-09	2.77e-08
B4GALNT1	3.98114	5.48732	1.2e-09	2.84e-08
AC091179.1	-4.36787	-1.84123	1.38e-09	3.22e-08
DLX4	2.98111	2.6353	1.41e-09	3.3e-08
FBXL13	-2.33044	2.08834	1.44e-09	3.37e-08
POLQ	2.19403	5.53878	1.47e-09	3.42e-08
CPM	-2.00078	5.74396	1.49e-09	3.45e-08
CDC25B	2.11242	7.75774	1.52e-09	3.53e-08
SIGLEC15	-2.18919	0.736827	1.53e-09	3.54e-08
PRLR	-2.71591	4.24067	1.68e-09	3.86e-08
WNT3	2.56424	2.99864	1.81e-09	4.13e-08
ITM2A	-2.05505	3.86952	2e-09	4.55e-08
LGI1	-3.08803	-0.927745	2.03e-09	4.6e-08
STC2	3.35556	5.48934	2.14e-09	4.84e-08
LINC01503	2.48771	4.10326	2.16e-09	4.86e-08
RD3	-2.64231	-2.46316	2.18e-09	4.9e-08
AL445686.2	-3.63607	-3.52733	2.34e-09	5.25e-08
GRIN2B	-2.58542	-0.343816	2.35e-09	5.26e-08
AFF3	-2.6335	3.18105	2.46e-09	5.49e-08
AC008687.3	2.87076	-0.507823	2.66e-09	5.89e-08
AC135012.3	-3.09327	-0.342336	2.7e-09	5.96e-08
DUXAP9	3.66542	1.33094	2.78e-09	6.14e-08
AP003548.1	-2.73444	-3.04092	2.84e-09	6.25e-08
FAM3B	-3.28061	4.3879	2.98e-09	6.51e-08
FCGBP	-2.48835	6.25068	2.99e-09	6.52e-08
PWAR6	-2.4172	2.23637	3.04e-09	6.62e-08
LINC02428	4.11964	1.3956	3.08e-09	6.7e-08
PCLAF	2.00597	5.9272	3.12e-09	6.78e-08
LINC01479	-3.76066	-2.92586	3.13e-09	6.79e-08
GAS2	-2.81899	0.932346	3.21e-09	6.96e-08
MMP14	2.01015	9.4741	3.39e-09	7.34e-08
AL450468.2	-3.66073	-3.74675	3.4e-09	7.35e-08
KLHDC8A	-2.46726	2.22834	3.43e-09	7.4e-08
DOK7	-2.22668	1.59979	3.47e-09	7.47e-08
TRIM40	-3.65325	-1.57806	3.56e-09	7.64e-08
C1QTNF6	3.04724	5.91436	3.59e-09	7.69e-08
AC007207.2	-3.98338	-2.65438	3.62e-09	7.74e-08
MAPK12	2.4183	4.70322	3.79e-09	8.09e-08
PSORS1C3	-2.67985	0.670994	3.83e-09	8.14e-08
LNCTAM34A	2.0316	1.35118	3.91e-09	8.31e-08
ST6GALNAC2	2.20235	6.68148	3.93e-09	8.33e-08
PDE1C	-2.24914	2.69059	3.97e-09	8.4e-08
ACTN2	-2.89081	1.30841	4.04e-09	8.54e-08
AL355877.1	-2.6094	-1.34283	4.11e-09	8.68e-08
LYVE1	-2.70818	3.68048	4.26e-09	8.93e-08
FAM135B	-3.14208	-0.628413	4.3e-09	9.01e-08
AKAP12	-2.32982	6.37972	4.42e-09	9.24e-08
HJURP	2.15807	5.23787	4.9e-09	1.02e-07
DLX6	4.86952	3.11648	4.9e-09	1.02e-07
RPLP0P2	2.55629	4.11155	4.96e-09	1.03e-07
GGT1	-2.16693	4.12687	5.01e-09	1.04e-07
FHL1	-2.52678	7.38263	5.17e-09	1.07e-07
LINC00891	-2.51332	-2.82218	5.85e-09	1.2e-07
LINC01415	2.74325	1.07497	5.86e-09	1.2e-07
COL27A1	2.23681	7.25097	6.13e-09	1.26e-07
TRIM31	-2.79777	2.37393	6.21e-09	1.27e-07
PAK3	-2.9065	2.19484	6.26e-09	1.28e-07
ENPP3	-2.42727	-0.254867	6.49e-09	1.32e-07
TCTEX1D2	2.18116	3.52985	6.96e-09	1.41e-07
LINC01593	-4.08674	-3.11033	7.74e-09	1.56e-07
CYP17A1	-2.16958	-0.922662	7.79e-09	1.57e-07
PI16	-3.76648	4.24567	7.82e-09	1.57e-07
AL355076.2	-2.54119	-2.00115	7.96e-09	1.59e-07
RUNX3	2.27388	6.19981	7.96e-09	1.59e-07
CLEC5A	3.05171	2.62923	8.03e-09	1.6e-07
ACSL5	-2.15262	5.54621	8.06e-09	1.61e-07
CRISPLD2	-2.02484	7.32185	8.1e-09	1.61e-07
ABCA9	-2.36706	2.52897	8.14e-09	1.62e-07
LINC01504	-2.22297	0.458528	8.5e-09	1.69e-07
WSCD1	-2.28809	1.53325	8.71e-09	1.72e-07
PCDH9	-2.88209	3.77432	9.59e-09	1.89e-07
PLPP4	4.24678	2.44522	1e-08	1.97e-07
TSPAN1	-2.56785	6.1259	1e-08	1.97e-07
PRSS2	-3.89396	1.05175	1.03e-08	2.01e-07
CDX2	-3.4768	2.45779	1.05e-08	2.04e-07
ZMAT1	-2.30955	2.87442	1.05e-08	2.04e-07
EVA1A	3.87458	3.40987	1.06e-08	2.05e-07
FAM72B	2.29519	2.02345	1.08e-08	2.09e-07
GFRA2	-2.19607	0.657654	1.09e-08	2.1e-07
KCNS3	2.86538	5.36616	1.09e-08	2.1e-07
AC025271.4	-3.464	-1.84093	1.1e-08	2.12e-07
RETNLB	-2.6533	-0.979059	1.11e-08	2.13e-07
ERVMER34-1	2.95173	4.90821	1.14e-08	2.19e-07
HAGLROS	3.24216	1.40799	1.17e-08	2.24e-07
WDR66	2.88984	6.09106	1.24e-08	2.36e-07
DPP10	-3.2781	0.412651	1.26e-08	2.39e-07
RAD51AP1	2.32115	5.16064	1.44e-08	2.71e-07
MMP17	2.48329	3.55034	1.44e-08	2.72e-07
IL1RAP	2.18739	7.20631	1.53e-08	2.87e-07
COL24A1	2.91038	2.92519	1.64e-08	3.07e-07
AL161630.1	-3.9365	-2.35724	1.66e-08	3.09e-07
MAPT	-2.17597	3.20318	1.7e-08	3.16e-07
LINC01082	-2.63796	-1.35573	1.81e-08	3.34e-07
TGFBR3	-2.21278	6.07751	1.81e-08	3.35e-07
BEND6	2.35933	2.98027	1.84e-08	3.39e-07
LINC01614	4.8938	1.22635	1.9e-08	3.49e-07
AC024581.1	3.78905	-0.818688	2.12e-08	3.86e-07
CDCA2	2.03192	4.88106	2.15e-08	3.91e-07
TMEFF2	-2.53932	-0.844878	2.18e-08	3.95e-07
SBSPON	-2.29538	4.26813	2.18e-08	3.95e-07
ST18	-2.2727	0.0358855	2.3e-08	4.17e-07
PCSK9	3.4666	5.87991	2.47e-08	4.45e-07
NDNF	-2.12747	2.07146	2.72e-08	4.87e-07
CHST1	3.77575	5.12305	2.75e-08	4.92e-07
RRM2	2.03417	7.47427	2.83e-08	5.06e-07
GPR176	3.0021	5.11664	2.83e-08	5.07e-07
AC091544.2	-2.90828	-2.0824	3.01e-08	5.34e-07
ICAM5	3.09928	2.89285	3.14e-08	5.55e-07
AC110048.2	-2.25972	-1.22215	3.16e-08	5.6e-07
PUDPP2	-3.02212	-0.965089	3.17e-08	5.6e-07
INSC	-2.31544	-0.795684	3.26e-08	5.74e-07
PTPN5	-2.35873	-0.44709	3.32e-08	5.84e-07
PODN	-2.17475	5.43326	3.35e-08	5.89e-07
CLEC19A	-3.41363	-2.77908	3.39e-08	5.95e-07
GRIN2A	-2.93022	2.75855	3.42e-08	5.98e-07
AC008080.4	-2.3313	-2.84273	3.48e-08	6.08e-07
GNAO1	-2.13198	4.3173	3.58e-08	6.22e-07
CPNE6	-2.55658	-1.34779	3.7e-08	6.4e-07
SLC13A3	-2.01023	3.0405	3.77e-08	6.51e-07
AL683887.1	4.10276	-0.514779	3.79e-08	6.53e-07
ADGRG5	-2.08466	3.00724	3.81e-08	6.56e-07
LINC02343	-3.84116	-3.5194	3.93e-08	6.75e-07
AL137793.1	-3.47286	-2.64755	3.94e-08	6.75e-07
AL161431.1	5.35757	6.86071	4.39e-08	7.47e-07
AP005230.1	3.31442	1.0787	4.53e-08	7.68e-07
CTNNA2	-2.84937	-1.22214	4.65e-08	7.88e-07
TNNT1	4.07484	4.54264	4.85e-08	8.2e-07
CYP4F62P	-3.35205	-3.3674	4.93e-08	8.32e-07
LINC01331	-3.55016	-3.74816	4.94e-08	8.33e-07
FAM83E	-2.21314	4.46508	4.95e-08	8.33e-07
AP000894.2	-2.61076	-1.67599	4.96e-08	8.34e-07
CDH13	2.71908	6.88228	5.08e-08	8.53e-07
LINC00491	3.84515	1.94917	5.11e-08	8.54e-07
SMOC2	-2.3314	5.93708	5.11e-08	8.54e-07
GRIA2	-2.83465	-0.617314	5.3e-08	8.87e-07
AL358176.4	-3.23749	-3.02864	5.4e-08	9.02e-07
KCNB1	-3.06433	2.82102	5.89e-08	9.81e-07
GABRE	3.08319	7.31219	6.53e-08	1.08e-06
LINC02561	5.2895	1.23627	6.94e-08	1.15e-06
G6PC2	-3.7675	-2.64935	6.96e-08	1.15e-06
AL031768.1	-2.02741	-2.12587	7.08e-08	1.17e-06
TFRC	2.35241	9.59835	7.25e-08	1.19e-06
AC117498.2	-2.67418	-2.23673	7.41e-08	1.22e-06
TMCC2	2.27818	3.97075	7.41e-08	1.22e-06
LINC01819	-2.94175	0.0947351	7.63e-08	1.25e-06
TMEM139	-2.44343	0.954997	7.66e-08	1.25e-06
TCEAL2	-2.79443	1.83412	7.71e-08	1.26e-06
CAPN13	-3.0261	4.0306	7.73e-08	1.26e-06
C12orf54	3.40681	2.39149	8.02e-08	1.3e-06
DRAIC	-2.86072	0.463126	8.09e-08	1.31e-06
AC000124.1	-2.84589	-3.13379	8.17e-08	1.33e-06
MAATS1	-2.58857	1.46811	8.33e-08	1.35e-06
GABRB3	-2.89572	3.21133	8.59e-08	1.39e-06
AC063919.1	-2.38921	-3.42132	8.83e-08	1.42e-06
GNAZ	-2.05905	3.64722	9.89e-08	1.58e-06
AC092691.1	-3.48386	-3.64988	1e-07	1.6e-06
DEFB126	5.02664	-0.761961	1.01e-07	1.61e-06
AC026782.2	3.76542	-1.14863	1.02e-07	1.63e-06
PRR5L	2.60011	4.57727	1.06e-07	1.69e-06
CA9	-2.78454	6.01116	1.06e-07	1.69e-06
AC131157.1	5.43028	0.054978	1.08e-07	1.72e-06
AC022898.2	-2.22413	-3.02219	1.12e-07	1.77e-06
CIB4	-2.7386	-3.14867	1.15e-07	1.81e-06
FJX1	2.06357	5.25339	1.15e-07	1.81e-06
UMOD	-3.56247	-2.68129	1.15e-07	1.81e-06
LINC02541	2.30959	2.18055	1.16e-07	1.82e-06
IDH2-DT	-2.65246	-2.35258	1.17e-07	1.83e-06
LINC01905	3.5325	-0.32892	1.17e-07	1.83e-06
FSIP2	-2.28443	3.37974	1.21e-07	1.9e-06
MAGEA10-MAGEA5	5.28355	-1.58902	1.3e-07	2.03e-06
AL355073.1	-2.17839	-2.74068	1.34e-07	2.07e-06
LINC01748	2.89966	2.57269	1.35e-07	2.09e-06
LINC01698	3.80063	-1.08325	1.36e-07	2.09e-06
CELA2A	-2.4423	-2.26509	1.39e-07	2.14e-06
FENDRR	-2.38042	4.13302	1.41e-07	2.16e-06
HS6ST2	3.59632	5.38058	1.43e-07	2.2e-06
RBFOX3	-2.25379	0.483736	1.45e-07	2.22e-06
AC012409.2	-2.63434	-3.31486	1.49e-07	2.26e-06
AL353764.1	3.05484	-1.28866	1.53e-07	2.33e-06
ABCA6	-2.01003	2.87455	1.59e-07	2.4e-06
AC131532.1	4.03853	0.173572	1.59e-07	2.4e-06
PHOX2B	-3.36538	-2.19481	1.62e-07	2.45e-06
LINC01814	-2.16644	-0.239116	1.65e-07	2.49e-06
TNC	3.40464	11.0603	1.66e-07	2.5e-06
AL513318.2	3.15499	3.469	1.7e-07	2.54e-06
GP2	-4.35548	3.76279	1.7e-07	2.55e-06
C7	-3.40909	6.09023	1.74e-07	2.6e-06
AC027698.1	-2.86301	-2.77454	1.81e-07	2.69e-06
GJB7	2.84505	1.89401	1.9e-07	2.82e-06
GPC1	2.18816	9.90371	2.12e-07	3.12e-06
ANK2	-2.32777	4.60584	2.39e-07	3.49e-06
CLDN16	3.04415	1.9533	2.42e-07	3.52e-06
LINC02321	3.26368	-1.39912	2.66e-07	3.83e-06
SUGCT	2.28214	3.24262	2.66e-07	3.83e-06
ONECUT2	-2.1461	3.48468	2.67e-07	3.83e-06
HOXC9	2.52372	2.44307	2.7e-07	3.87e-06
SLC4A10	-2.34496	-1.36545	2.75e-07	3.93e-06
BLACAT1	3.07389	3.34809	2.76e-07	3.95e-06
LAMC2	3.23207	10.4382	2.83e-07	4.03e-06
AL117329.1	2.92453	1.41277	2.89e-07	4.11e-06
AL359764.1	-3.32522	-3.10837	2.91e-07	4.13e-06
AC138512.1	-2.52506	-3.37929	2.94e-07	4.17e-06
TMEM45A	3.30027	7.03849	2.94e-07	4.17e-06
AC245041.2	3.02511	4.48034	2.99e-07	4.23e-06
TGFBI	3.0755	9.72681	3.1e-07	4.38e-06
C12orf56	2.85347	3.55169	3.11e-07	4.39e-06
LINC00519	3.86099	2.64748	3.32e-07	4.63e-06
TYMSOS	2.12408	1.7456	3.42e-07	4.77e-06
LY6E-DT	2.2936	1.58476	3.47e-07	4.82e-06
GPC2	2.28712	1.53741	3.5e-07	4.86e-06
AC113398.2	-2.5706	-3.68664	3.71e-07	5.14e-06
LINC00640	2.79252	1.47335	3.76e-07	5.2e-06
AC007950.1	-3.44235	-3.60164	3.9e-07	5.35e-06
TMEM26	2.62134	1.757	3.91e-07	5.36e-06
AC106798.1	3.03305	0.342383	3.97e-07	5.42e-06
AC010998.3	-3.44542	-0.458646	4.01e-07	5.48e-06
AC015845.2	-2.41011	-2.66951	4.02e-07	5.49e-06
AC018716.2	5.09718	-0.0886773	4.15e-07	5.66e-06
AC090970.2	2.20988	0.681966	4.22e-07	5.74e-06
STON2	2.0214	6.65664	4.26e-07	5.78e-06
LINC01393	3.02892	-0.638333	4.38e-07	5.94e-06
PPFIA2	-2.08467	0.0332602	4.38e-07	5.94e-06
ISL1	-3.20134	1.08764	4.41e-07	5.98e-06
KC877982.1	7.67116	0.115606	4.56e-07	6.15e-06
GASAL1	2.56103	2.02629	4.58e-07	6.18e-06
TUSC8	-4.00781	-1.23759	4.73e-07	6.34e-06
AL121580.1	3.26081	-2.38225	4.78e-07	6.4e-06
LINC01266	-2.43719	-1.1888	4.8e-07	6.41e-06
LINC01410	2.0164	2.62916	4.84e-07	6.45e-06
PODNL1	2.38279	4.71706	4.91e-07	6.55e-06
GALNT15	-2.05514	3.58301	4.96e-07	6.59e-06
GBP1P1	2.15	4.54226	4.96e-07	6.59e-06
AL445426.1	-2.46649	-2.61027	4.97e-07	6.59e-06
AL358334.2	3.17411	2.09805	4.99e-07	6.61e-06
ERP27	-2.09936	2.38353	5.1e-07	6.73e-06
CD86	2.01357	3.95206	5.2e-07	6.85e-06
AL078590.2	5.00867	2.91882	5.44e-07	7.14e-06
LINC01050	4.89329	-2.01594	5.6e-07	7.32e-06
MKRN3	2.92857	3.04431	5.63e-07	7.36e-06
Z82198.1	-2.71872	-3.60236	5.66e-07	7.4e-06
INHBA	3.24038	7.73815	6.34e-07	8.23e-06
Z94160.1	-3.13044	-3.4311	6.4e-07	8.29e-06
IL33	-2.31464	4.87315	6.72e-07	8.66e-06
SORBS1	-2.39207	7.82944	6.96e-07	8.95e-06
CARMN	-2.21361	4.33068	7.15e-07	9.18e-06
AC090044.1	-2.65219	-2.45624	7.24e-07	9.29e-06
CTSC	2.03152	9.15119	7.29e-07	9.35e-06
AL021408.1	-2.50619	-2.93779	7.32e-07	9.37e-06
PTPRN	-2.33019	1.89983	7.48e-07	9.56e-06
AC009262.1	3.54855	-1.71571	7.69e-07	9.79e-06
DAPK1-IT1	-2.159	-3.1485	7.88e-07	1e-05
AL118508.1	4.49308	2.13774	8.03e-07	1.01e-05
AC009271.1	3.07117	0.973592	8.04e-07	1.01e-05
HHIP	-2.56133	3.21889	8.46e-07	1.06e-05
ENPP5	-2.24855	3.61021	8.65e-07	1.08e-05
CXCL6	3.70634	4.11247	8.87e-07	1.11e-05
AL139081.1	-2.40762	-3.19804	9.3e-07	1.16e-05
AC096751.1	-2.32632	-2.15141	9.37e-07	1.17e-05
SLC47A1	3.16075	3.64568	9.4e-07	1.17e-05
AC011247.2	-2.86319	-2.73353	9.66e-07	1.2e-05
AP003059.2	-2.47789	-3.42048	1.04e-06	1.28e-05
ALDH1A1	-2.54468	8.35167	1.04e-06	1.28e-05
GALNT16	-2.19759	1.96983	1.05e-06	1.3e-05
NEGR1	-2.18213	4.11957	1.08e-06	1.33e-05
AC005165.1	-2.22838	-0.00353852	1.08e-06	1.33e-05
AC106799.2	4.19393	0.243337	1.13e-06	1.39e-05
AC106799.1	4.29429	-0.285996	1.14e-06	1.39e-05
IQCA1	3.1263	3.80434	1.14e-06	1.39e-05
LINC00460	4.52559	1.24171	1.15e-06	1.41e-05
DUXAP8	2.73196	4.02437	1.29e-06	1.56e-05
AL136162.1	2.04138	0.318364	1.32e-06	1.58e-05
AC079160.1	2.85328	1.33789	1.33e-06	1.6e-05
ZP3	2.00449	3.53295	1.33e-06	1.6e-05
LOXL2	2.20084	7.02724	1.37e-06	1.64e-05
CCDC33	-2.57797	-1.92352	1.4e-06	1.67e-05
EPHA10	-2.26468	1.60181	1.45e-06	1.73e-05
IQCM	3.91693	-0.94843	1.47e-06	1.75e-05
AC005920.4	-2.8612	-1.71888	1.53e-06	1.81e-05
SEMA3E	-2.56847	3.1502	1.58e-06	1.86e-05
AC135586.2	-2.10391	-3.64236	1.61e-06	1.9e-05
AC023034.2	2.88355	-1.17425	1.63e-06	1.91e-05
RGS7BP	-2.43474	0.473461	1.65e-06	1.94e-05
CASQ2	-2.54762	3.54807	1.7e-06	1.99e-05
LINC01625	-2.63668	-2.91044	1.72e-06	2.01e-05
NCAM1	-2.3593	4.32681	1.73e-06	2.02e-05
GABRD	2.25227	0.666828	1.76e-06	2.04e-05
TENM2	3.24858	8.33687	1.79e-06	2.07e-05
AC126768.2	2.54329	1.48836	1.79e-06	2.07e-05
AC135782.1	-2.2225	-2.33354	1.79e-06	2.08e-05
CILP2	2.94462	2.73579	1.91e-06	2.21e-05
AC099487.1	3.1459	-0.944199	1.96e-06	2.26e-05
AL359513.1	2.15199	0.437241	1.98e-06	2.27e-05
PLA2G2C	-2.27358	-2.83032	2.03e-06	2.33e-05
MYO18B	-2.55754	1.97654	2.1e-06	2.4e-05
AC113346.1	5.55538	-1.42698	2.12e-06	2.42e-05
CAGE1	2.45012	0.22188	2.13e-06	2.42e-05
AC122710.2	4.11866	-1.57595	2.14e-06	2.44e-05
VSNL1	2.26864	6.90329	2.19e-06	2.48e-05
SLC2A9	2.06545	4.72165	2.19e-06	2.49e-05
AC109454.3	4.84403	1.36987	2.24e-06	2.53e-05
LNCAROD	5.07307	2.08017	2.29e-06	2.57e-05
MIR2117HG	4.11005	0.565958	2.29e-06	2.58e-05
AL356417.1	-2.52067	-2.81596	2.29e-06	2.58e-05
AC007638.1	-3.08604	-2.72525	2.3e-06	2.58e-05
MEX3A	2.72632	4.92622	2.33e-06	2.62e-05
COL12A1	2.24833	9.34389	2.35e-06	2.63e-05
LINC01927	-2.58316	-3.27115	2.36e-06	2.65e-05
LINC01829	-2.12146	-1.62673	2.37e-06	2.65e-05
LINC01554	-2.1623	-0.623269	2.4e-06	2.67e-05
AQP7	-2.18444	-0.0532596	2.42e-06	2.69e-05
DEGS2	-2.0409	4.59724	2.44e-06	2.71e-05
BARX1-DT	-2.45289	-1.57737	2.46e-06	2.73e-05
DLX5	3.62798	5.25007	2.52e-06	2.78e-05
FCGR3A	2.53791	5.55717	2.6e-06	2.85e-05
AL160408.5	3.55257	-1.65284	2.62e-06	2.88e-05
LGALS1	2.09091	8.49999	2.66e-06	2.92e-05
LINC01010	3.43085	1.63489	2.75e-06	3e-05
PMEPA1	2.09358	8.06543	2.75e-06	3.01e-05
AC004817.3	4.04311	-0.560662	2.76e-06	3.02e-05
LINC02154	7.1824	2.70192	2.8e-06	3.06e-05
SCAT1	3.73473	0.92435	2.8e-06	3.06e-05
SRRM3	2.10499	4.77991	2.81e-06	3.06e-05
FAT3	-2.36051	2.88145	2.94e-06	3.18e-05
AC004947.1	-2.1666	-2.65221	2.95e-06	3.19e-05
LINC02577	4.22603	2.74612	2.99e-06	3.22e-05
NCF2	2.10351	4.97288	3.03e-06	3.26e-05
AL583808.1	3.88984	0.452903	3.04e-06	3.27e-05
AP000251.1	2.47593	0.336316	3.06e-06	3.28e-05
AC106799.3	4.15337	0.78822	3.06e-06	3.28e-05
FAR2P1	5.10591	3.15277	3.14e-06	3.36e-05
WNT7A	4.12093	3.20055	3.27e-06	3.48e-05
HCN1	-2.51902	-1.75106	3.35e-06	3.56e-05
C2orf48	2.32355	1.26522	3.41e-06	3.62e-05
MSC	3.01785	5.42839	3.57e-06	3.76e-05
GBA3	-2.55945	-1.86236	3.7e-06	3.89e-05
AL356234.2	3.83044	-0.230807	3.8e-06	3.98e-05
TFAP2A	2.06829	7.55461	3.87e-06	4.06e-05
LINC01981	3.12157	-1.24033	3.96e-06	4.14e-05
DGCR5	2.59667	1.98753	4.11e-06	4.3e-05
DPP6	-2.50054	1.12332	4.28e-06	4.45e-05
LINC01929	4.14764	0.885273	4.32e-06	4.49e-05
LINC02331	-2.87999	-3.82462	4.41e-06	4.57e-05
ADCY5	-2.33675	5.52728	4.42e-06	4.57e-05
POU6F2	3.29561	3.50369	4.45e-06	4.6e-05
LINC01592	4.02689	-1.2451	4.49e-06	4.63e-05
LINC01615	4.1513	2.54997	4.53e-06	4.68e-05
STRA6	3.60604	5.43465	4.55e-06	4.69e-05
CLEC12A-AS1	3.95517	0.76302	4.56e-06	4.7e-05
HOXB7	2.08004	4.39288	4.62e-06	4.75e-05
TPO	-2.01765	1.0844	4.66e-06	4.79e-05
ABCA13	3.84018	6.80292	4.71e-06	4.82e-05
MROH2A	-2.42214	1.09353	4.72e-06	4.84e-05
PTGES	2.79166	5.83963	4.76e-06	4.87e-05
DLL3	2.86986	0.518856	4.89e-06	4.99e-05
HEY1	2.70313	5.36491	4.91e-06	5e-05
CPS1	-2.18005	3.6991	5.15e-06	5.21e-05
SPATA8	-2.58931	-3.25882	5.25e-06	5.3e-05
CSAG3	6.59541	1.22821	5.27e-06	5.32e-05
AC078788.1	3.61491	-1.73986	5.3e-06	5.34e-05
AC025524.2	-3.09507	-2.66543	5.34e-06	5.37e-05
GBP1	2.20875	7.43416	5.44e-06	5.45e-05
PRAME	4.57308	5.29853	5.47e-06	5.48e-05
AP002784.1	3.29262	-0.600313	5.56e-06	5.55e-05
VXN	-2.09419	0.396923	5.66e-06	5.64e-05
BGN	2.35204	9.88199	5.8e-06	5.76e-05
TTC6	-2.28939	2.00209	5.88e-06	5.84e-05
AP000907.2	-2.07339	-3.58797	6.07e-06	6.01e-05
VSTM2A-OT1	-2.93287	-3.78114	6.08e-06	6.02e-05
PYY2	4.57162	3.12139	6.13e-06	6.05e-05
AP000526.1	3.2778	-1.07311	6.13e-06	6.05e-05
LINC00628	-2.24535	-2.98425	6.16e-06	6.07e-05
OR9K1P	5.48306	-1.49094	6.2e-06	6.09e-05
LINC00314	-2.63522	-3.80593	6.51e-06	6.38e-05
GBP5	3.40056	6.29687	6.52e-06	6.38e-05
S100P	-2.32918	6.3878	6.67e-06	6.5e-05
PGBD5	2.8087	5.17723	6.74e-06	6.56e-05
LINC00898	3.52783	0.378685	6.78e-06	6.59e-05
AC005180.2	-2.18067	-0.634674	6.88e-06	6.67e-05
IGF2BP3	3.35867	5.30699	7.08e-06	6.84e-05
AL135818.2	2.9136	0.395188	7.16e-06	6.91e-05
KC6	3.45185	2.42132	7.3e-06	7.02e-05
AC124067.3	-3.07019	-3.43873	7.31e-06	7.04e-05
CASC15	2.046	3.43768	7.32e-06	7.04e-05
IL12RB2	3.23188	3.73605	7.33e-06	7.04e-05
DMC1	2.02158	1.56427	7.47e-06	7.16e-05
ADAMTSL3	-2.16452	3.70496	7.62e-06	7.29e-05
AC019257.1	-2.43906	-3.18814	7.65e-06	7.32e-05
TSPAN10	2.15431	2.90341	7.67e-06	7.33e-05
BMS1P22	3.38042	-0.861886	7.68e-06	7.33e-05
CCDC196	-2.31741	-2.39598	8.11e-06	7.71e-05
LINC02454	4.04456	0.00594705	8.26e-06	7.84e-05
ANOS1	2.06166	4.92729	8.55e-06	8.07e-05
ZDHHC19	2.47676	-0.821582	8.59e-06	8.09e-05
KBTBD11-OT1	-2.54902	-3.50535	8.61e-06	8.11e-05
TNIP3	2.87239	2.45254	8.69e-06	8.18e-05
LINC01954	-2.71958	-2.91036	8.76e-06	8.22e-05
MUCL1	6.52287	4.10806	8.81e-06	8.26e-05
LINC00392	7.95897	2.76271	9.07e-06	8.48e-05
AL358332.1	2.54831	-0.873346	9.12e-06	8.51e-05
CNKSR2	-2.40272	2.10152	9.23e-06	8.61e-05
AC093627.6	-2.34493	-1.95707	9.64e-06	8.96e-05
CHIAP2	-3.52997	-3.38756	9.77e-06	9.06e-05
CXCL1	3.93645	7.01836	9.96e-06	9.21e-05
FMO1	2.31109	3.06972	1.04e-05	9.56e-05
AL139327.2	4.83323	-0.617442	1.04e-05	9.57e-05
FAP	2.63395	5.05213	1.04e-05	9.62e-05
AC024940.1	3.58487	2.63078	1.05e-05	9.69e-05
CSAG2	5.59357	-0.0422277	1.07e-05	9.86e-05
C5orf46	3.71475	0.729115	1.08e-05	9.9e-05
RYR2	-2.15538	4.54091	1.08e-05	9.9e-05
C19orf81	3.55677	0.325713	1.11e-05	0.000101312
MAMDC2	-2.14634	4.50579	1.13e-05	0.000102673
LINC01711	3.48358	-0.72849	1.13e-05	0.00010276
PLAC8	-2.04962	4.88547	1.14e-05	0.000103787
LINC01806	2.17466	3.43957	1.15e-05	0.000104253
LINC00942	6.41144	4.64557	1.2e-05	0.000108144
AC133041.1	-2.5526	-3.75588	1.2e-05	0.000108302
AC124312.4	-2.09285	-2.41089	1.21e-05	0.000109387
PTGIS	-2.28872	5.41475	1.23e-05	0.000110805
KCNMA1	-2.20446	6.87739	1.25e-05	0.000112868
LINC01873	2.46349	-1.06613	1.29e-05	0.000115605
GNLY	2.9047	4.08725	1.31e-05	0.000117274
AOC1	-2.29585	4.12626	1.34e-05	0.000119188
LINC01338	3.38651	-1.65387	1.36e-05	0.000120817
AL133353.1	2.16026	-0.191652	1.36e-05	0.000121061
LINC00184	2.94196	-0.138528	1.5e-05	0.000132715
DDC	-2.38938	1.9589	1.51e-05	0.000133132
LINC01116	2.44594	2.49375	1.52e-05	0.000134238
AL355601.1	4.03735	-1.79717	1.53e-05	0.000134534
DIRC1	3.66743	-1.93555	1.56e-05	0.000136805
CHMP1B2P	-2.50721	1.16466	1.61e-05	0.000140795
DLX1	3.06103	2.08487	1.61e-05	0.000141041
RPSAP52	3.06437	1.43486	1.64e-05	0.000142855
CABYR	3.26241	4.57667	1.64e-05	0.000142855
SLCO1B3	4.64371	3.04536	1.72e-05	0.000149876
SMKR1	2.75842	1.22262	1.84e-05	0.000158481
LINC00645	3.25466	-1.48325	2.02e-05	0.000172254
LINC01985	-2.06596	-2.86244	2.05e-05	0.000174335
AL359771.1	4.28801	0.506645	2.07e-05	0.000175757
CYP4A11	-2.12825	-2.15959	2.12e-05	0.000179331
EGFL6	2.17835	4.83682	2.14e-05	0.000180662
BX322234.2	4.53928	-1.34273	2.14e-05	0.000180662
LINC01975	-3.08765	-3.60127	2.23e-05	0.000187296
LINC01807	4.51988	0.97345	2.29e-05	0.000191383
FAR2P4	4.88998	1.6561	2.33e-05	0.000194727
ATP1A2	-2.64694	4.4202	2.33e-05	0.000194831
COX6B2	2.76445	2.40035	2.35e-05	0.000195864
AC034213.1	4.29729	-0.561307	2.37e-05	0.000197468
AGTR1	-2.02325	1.08246	2.42e-05	0.000200838
FOXD1	2.46463	4.26035	2.48e-05	0.000205486
AL391152.1	2.03314	-0.891806	2.54e-05	0.000209975
LINC00457	-2.9098	-3.81153	2.55e-05	0.000209975
AC069148.1	2.5305	-0.609313	2.58e-05	0.000212055
CA8	-2.34104	2.78453	2.78e-05	0.000227163
AC010595.1	3.28647	0.541601	2.86e-05	0.000232636
CREG2	3.16501	3.63633	2.95e-05	0.000238822
AC127526.1	-2.28357	-3.18044	3e-05	0.000242832
LINC02450	3.47272	-0.571607	3.03e-05	0.000244667
AIM2	3.43051	4.50166	3.11e-05	0.000250418
TESC-AS1	-2.1578	-3.01176	3.16e-05	0.000253793
AC120498.2	-2.13706	-2.81456	3.19e-05	0.000256118
AC022075.2	-2.32215	-2.24829	3.3e-05	0.000263505
AL160408.4	3.83679	-1.52897	3.31e-05	0.000264073
LINC02408	2.81446	-1.68833	3.4e-05	0.000270201
LINC02407	2.55809	-1.3141	3.43e-05	0.000272173
MYT1L	-2.17099	-2.12961	3.58e-05	0.00028268
AL161457.1	-2.81555	-3.06581	3.6e-05	0.000284202
ABCC6P2	-2.10025	-1.76862	3.6e-05	0.000284202
PGM5	-2.36604	5.28353	3.6e-05	0.000284202
APOBEC4	-2.36158	-2.92454	3.61e-05	0.000284625
AC124657.1	-2.31724	-3.55152	3.62e-05	0.000284928
LINC00885	2.86637	2.99566	3.64e-05	0.00028616
AL137246.1	-2.04521	-3.43561	3.65e-05	0.000286599
AC016205.1	2.25338	1.76247	3.68e-05	0.000288608
AC006116.10	-2.03069	-2.75402	3.69e-05	0.000289298
LINC02518	4.78609	-0.751116	3.79e-05	0.000296516
CNTN5	3.71724	2.09989	3.82e-05	0.000298083
AP003059.1	-2.04325	-2.74081	3.85e-05	0.000300316
ANO1	2.89195	9.77462	3.95e-05	0.00030714
LINC01932	2.65722	0.146488	4e-05	0.000310704
TREML3P	4.79889	1.09711	4.11e-05	0.000318258
C17orf99	2.24699	0.100034	4.16e-05	0.000321318
SLITRK6	3.18188	5.33968	4.24e-05	0.00032711
LINC01508	5.10242	0.629282	4.28e-05	0.00032977
RIPPLY3	2.76104	1.90389	4.3e-05	0.000331212
RAET1K	2.11832	-0.333571	4.41e-05	0.000338347
ZNF536	-2.00926	0.893102	4.44e-05	0.000340446
AC015908.4	-2.87027	-3.58906	4.48e-05	0.00034297
HKDC1	-2.36804	2.81514	4.52e-05	0.00034572
RSAD2	2.55027	5.96795	4.57e-05	0.000348648
DOC2A	2.53486	1.78892	4.58e-05	0.000348746
LINC02043	2.1706	-0.310252	4.58e-05	0.000348834
AC015660.1	3.12384	0.0214373	4.59e-05	0.000349279
AC004585.1	2.38508	-0.0737706	4.62e-05	0.000351603
SORCS1	-2.17106	1.43593	4.77e-05	0.00036183
DCSTAMP	3.44707	-0.22412	4.82e-05	0.000365439
CHRNA1	2.71489	0.488171	4.9e-05	0.000370087
AC105150.1	-2.46727	-3.78362	4.99e-05	0.000376377
AC005180.1	-2.11929	-0.79963	5.1e-05	0.000383426
AC026462.3	-3.36369	-3.35985	5.11e-05	0.000384118
AC082651.3	2.44986	1.30337	5.14e-05	0.000385938
IL24	2.47318	2.97223	5.16e-05	0.000386903
AL645608.7	2.12163	2.47741	5.2e-05	0.000389369
AL136369.2	-2.64187	-3.84117	5.22e-05	0.000391059
GTF2IRD2P1	2.43288	2.99578	5.25e-05	0.000392493
GCLM	2.42486	7.91278	5.33e-05	0.00039764
LINC02574	3.23725	-2.70017	5.46e-05	0.000405685
GCOM1	-2.01149	1.4902	5.63e-05	0.0004176
AL023755.1	2.21893	-0.34782	5.81e-05	0.000429106
C17orf82	2.09758	0.122168	5.93e-05	0.000436665
LINC00689	-2.44727	-0.477196	6.05e-05	0.000445032
LINC02344	-2.06112	-3.14406	6.08e-05	0.000446859
P2RX3	-2.07502	-2.49247	6.24e-05	0.000457213
LINC00543	-2.09594	-0.676129	6.3e-05	0.000460575
TNNI3	3.21158	0.588504	6.4e-05	0.000467514
SMYD1	-2.49691	-0.707794	6.41e-05	0.000467838
NRSN1	-2.43339	-2.10148	6.5e-05	0.000473309
KRT42P	3.84418	4.16924	6.85e-05	0.000494663
AC114400.1	-3.10238	-3.41713	6.85e-05	0.000494663
LINC01234	4.44039	2.36516	6.94e-05	0.000500621
LINC02242	2.49984	-2.0145	6.95e-05	0.000500794
SULF1	2.21834	8.2369	7.16e-05	0.000513323
PRUNE2	-2.30566	6.88556	7.24e-05	0.000518871
LINC02137	3.05366	0.505051	7.29e-05	0.000521598
IGFL2	3.98914	3.41765	7.55e-05	0.000538397
SCNN1B	-2.0552	5.72449	7.61e-05	0.000542333
KLHDC7B	3.92245	6.45695	7.62e-05	0.000542501
LINC00332	-3.08939	-3.01635	7.65e-05	0.000543764
PLA2G2A	-2.63798	5.64588	7.98e-05	0.000563962
GRIN3B	3.00608	2.6672	8.08e-05	0.000570082
TUBBP5	2.09727	3.00581	8.19e-05	0.000576081
AL162574.2	4.79652	-1.44919	8.23e-05	0.000578551
CARD17	3.17038	1.24652	8.34e-05	0.000584684
AC113189.4	2.13945	-1.23008	8.36e-05	0.000585725
PTH2R	4.16998	2.62303	8.38e-05	0.000586568
EPHA5-AS1	-2.89124	-2.59312	8.63e-05	0.000601459
MIR7-3HG	-2.20524	-2.95893	8.67e-05	0.000603945
ADAMTS9-AS1	-2.29886	1.76139	8.8e-05	0.000611763
LINC02389	-2.16396	-1.68459	8.9e-05	0.000617298
RMST	-2.47654	-1.57012	9.22e-05	0.000636755
RDH16	2.25591	2.84776	9.33e-05	0.000643481
AC010280.1	5.14428	-0.301625	9.44e-05	0.000650028
COCH	3.88485	4.58599	9.44e-05	0.000650028
LINC02156	2.18167	-1.45681	9.53e-05	0.000655584
AP002957.1	2.96652	-1.65539	9.97e-05	0.00068094
AL133387.1	-2.54971	-3.82308	9.98e-05	0.000681411
FBN2	3.24523	6.33353	0.000100215	0.000683148
SMPD4P1	3.22303	1.71433	0.000101552	0.000691144
AC116337.3	-2.21217	-2.76401	0.000101588	0.000691144
AL162408.1	-2.45243	-3.49702	0.000102418	0.000695965
LINC01471	-2.70912	-3.29189	0.000104025	0.000704665
AC128709.2	3.60596	-0.222334	0.000105142	0.000710833
ADGRG7	-2.78713	1.13952	0.000105488	0.000712679
LINP1	3.72638	1.94313	0.000106536	0.000718846
MIR663AHG	2.38969	-1.5882	0.000106724	0.000719553
SLCO6A1	2.93154	-0.488839	0.000107263	0.000722903
MAT1A	2.89868	0.846798	0.000107555	0.000724589
AL078601.2	-2.2795	-3.80433	0.000107741	0.000725275
SLC47A2	2.7043	3.83766	0.000108909	0.000731421
UCHL1	3.60739	7.677	0.000109531	0.000735026
LINC00844	-2.89372	-3.59854	0.0001118	0.000748507
AC084211.1	3.91169	-3.09672	0.000113137	0.000756278
AC096751.2	-2.03883	-3.00633	0.00011358	0.000758358
AC006206.2	2.32161	2.09135	0.000115395	0.000767507
GRM4	2.68266	1.66088	0.000116303	0.000772946
LINC00592	2.22422	-0.2852	0.000117198	0.000777398
RGS20	2.41396	3.54744	0.000117549	0.000778825
LINC00393	4.53185	0.0531556	0.000117703	0.000779545
SH2D5	3.05195	3.8413	0.000118239	0.000782797
GABRB2	-2.13932	1.29685	0.000119156	0.00078757
MLIP-IT1	2.1679	-1.12502	0.000119189	0.00078757
AC104211.1	-2.51395	-3.33852	0.000119703	0.000790362
LINC00707	3.92803	3.7053	0.000120861	0.000796481
LINC00710	-2.32946	-2.19519	0.000121397	0.000798253
CYP27B1	2.01241	3.39245	0.000121454	0.000798253
AC093382.1	2.16477	-1.88368	0.000124215	0.0008133
LINC01561	2.62559	-0.880525	0.000125054	0.00081787
LINC02582	5.4781	2.68777	0.000126933	0.000827632
KRT17P2	2.27297	2.1183	0.000127375	0.000829886
GYG2P1	-2.7604	-0.290874	0.000128041	0.000832964
HERC2P5	3.14741	-1.87675	0.000128954	0.000838589
AC007495.1	-2.09832	-2.0324	0.000129428	0.000840751
LINC01844	-2.06632	-2.50708	0.000129481	0.000840751
LINC02015	3.65365	0.832782	0.00013021	0.00084421
MIR205HG	2.33676	7.94253	0.000130288	0.000844399
TTTY14	-2.10633	0.983687	0.000136856	0.000882161
LINC02457	3.10059	-0.170051	0.000136883	0.000882161
NPTX1	-2.04173	2.79637	0.000138007	0.000888077
MUC16	3.56723	4.8009	0.000138553	0.000891023
AL034374.1	2.21249	-2.50796	0.000138982	0.00089335
AC068473.4	3.27044	-1.64327	0.00014016	0.000898696
CECR2	2.665	4.27975	0.000140262	0.000898899
PSG5	4.67526	0.213627	0.000140661	0.000901038
AC025271.2	-2.39989	-3.45799	0.000144247	0.00092067
AL512625.2	2.11662	-0.148017	0.000144602	0.000922072
TAAR3P	-2.8971	-2.90861	0.000147806	0.000939559
AC005722.2	2.92182	1.49046	0.00014824	0.00094197
SEMA5B	2.3274	2.96326	0.00014936	0.000947339
LINC00626	4.07397	-0.617131	0.00014958	0.000948383
SLC38A11	-2.02198	2.85458	0.000150615	0.000954249
GBX2	2.75115	0.0350263	0.000152076	0.000962089
AC022079.1	2.06473	-0.324105	0.000152154	0.000962228
AC069360.1	2.35582	-0.401261	0.000152378	0.000962936
AC015818.2	2.75705	-2.33119	0.000152563	0.000963753
MFSD2A	2.11094	5.99932	0.000153799	0.00097085
AP005328.1	3.00695	-0.788365	0.000155709	0.000980748
AL355607.2	3.97344	-0.858367	0.000159233	0.000999655
LINC02438	3.53915	-1.70813	0.000161667	0.00101236
LINC01117	2.12205	-0.249032	0.000165925	0.00103377
AL390334.1	2.77047	0.256002	0.000168361	0.00104667
TESMIN	2.94569	5.07332	0.000170549	0.0010582
TRHDE	-2.18472	0.697964	0.000175648	0.00108493
AC114296.1	2.54653	-1.24966	0.000176046	0.0010866
COL5A1	2.13632	9.84226	0.000178265	0.00109833
AC025244.1	2.99384	-1.33359	0.000178656	0.00110035
EFCAB1	2.35705	1.96733	0.000179141	0.00110275
LINC02443	2.70279	-2.11887	0.000180496	0.0011097
AL357146.1	-3.06032	-3.13531	0.000181165	0.00111342
KCNA2	-2.29179	0.307992	0.000187815	0.001151
IGFBP3	2.08383	8.7561	0.000191185	0.00116833
DMRT2	3.49599	3.67669	0.000191817	0.00117136
GOLGA7B	2.40054	5.00287	0.000192939	0.00117696
CASC9	2.37813	4.24094	0.000193322	0.00117888
AC009878.1	-2.16996	-2.84738	0.000194845	0.00118523
LINC00958	2.32779	5.60273	0.000197735	0.0012007
AL157904.1	2.1196	-1.37831	0.000197986	0.00120179
ADAM8	2.02744	5.77691	0.000198127	0.00120222
AC126768.1	2.3759	-0.675979	0.000201368	0.00121889
UGT2B7	-2.25477	-1.42453	0.00020468	0.00123503
LINC00454	-2.03684	-3.80412	0.000208524	0.00125691
KRT17P6	2.10009	1.70269	0.000212496	0.00127638
AL118511.2	-2.5093	-3.68708	0.00021659	0.00129893
BCAT1	2.24581	7.04158	0.000227593	0.00135713
LINC02544	2.12562	-1.5467	0.000238779	0.00141356
AC126768.3	2.79081	-0.981993	0.000238877	0.00141366
AL035258.1	4.66999	-0.634937	0.000239088	0.00141442
KRT17P1	2.19447	2.28095	0.000248438	0.0014637
AC116049.2	2.57638	-0.500546	0.000248858	0.00146517
ANKRD18B	2.38555	3.71997	0.000251556	0.00147854
AC112721.2	2.59961	-1.87408	0.000258169	0.00151071
SLC13A5	3.88803	4.05888	0.000264473	0.0015434
IGFL2-AS1	3.53259	4.12991	0.00026736	0.00155761
FNDC1	2.34456	5.53211	0.00026751	0.00155796
AL353803.5	-2.00403	-3.64095	0.000267897	0.00155969
IL13RA2	3.20961	1.7814	0.000268066	0.00156014
ADAMDEC1	2.18309	3.09932	0.000268731	0.00156349
LINC00656	2.7762	-2.23093	0.000269296	0.00156625
AC107308.1	3.18528	-0.971407	0.000270002	0.00156947
PHF24	2.80029	2.88037	0.000270032	0.00156947
GTSF1	4.38878	3.87139	0.000275379	0.00159838
AL355483.1	2.82811	-2.8495	0.000278015	0.00161097
UMODL1-AS1	-2.08338	-3.33747	0.00028355	0.00163864
SOX2-OT	2.83731	3.79555	0.000285393	0.00164763
AC100823.1	-2.41928	-2.18681	0.000285884	0.00164991
ANKUB1	2.26368	0.265007	0.000286788	0.00165402
FNDC1-IT1	3.26005	-3.47851	0.000287256	0.00165561
C9	3.32929	0.339855	0.000287854	0.0016585
AC018716.1	3.63346	-1.12891	0.000289583	0.00166791
SLC47A1P2	2.96209	0.342124	0.000293426	0.00168329
ODC1	2.1162	9.49262	0.000296928	0.00170099
SDK2	2.12712	6.04224	0.000300296	0.00171756
AC023310.4	4.70404	0.240473	0.000301795	0.00172498
SLC6A10P	3.79639	1.5612	0.000306029	0.00174514
LINC01967	2.5387	0.696444	0.000307091	0.00174945
EGR2	2.14178	5.18377	0.000307445	0.00175089
AC063952.1	2.09327	-1.43632	0.000321474	0.00182416
AL049649.1	3.50818	-1.26369	0.00032231	0.00182649
LINC01385	4.02902	-3.02274	0.000322724	0.00182764
ARPP21	-2.51736	-2.45262	0.000323074	0.00182842
IRX6	3.13087	2.85799	0.000324469	0.00183475
MAGED4B	2.17595	-1.64466	0.000328861	0.00185265
AL160408.1	2.17045	-0.187848	0.000329594	0.00185557
SCUBE1	-2.09873	4.4157	0.000331334	0.00186232
TG	2.61338	2.4199	0.000333206	0.0018704
TPRG1-AS1	2.01142	0.359203	0.000337728	0.00189086
LINC00251	-2.96563	-3.61347	0.000340475	0.0019013
AL513123.1	2.23375	0.0743504	0.000342648	0.00191157
GATA3	2.06174	3.52789	0.000344943	0.00192314
NKAIN1	2.01943	1.1984	0.000351036	0.00195016
KLK4	2.63258	-0.161432	0.000352877	0.0019585
AC004801.5	-2.1666	-3.49708	0.000359802	0.00199308
AL445250.1	2.99263	-1.19797	0.000370137	0.00204512
AC122694.1	4.55399	-1.26775	0.000373709	0.00206216
LINC01451	2.35928	2.1906	0.000382546	0.00210352
AL365356.3	3.73511	1.03459	0.000387705	0.00212848
RGR	-2.35122	-2.84719	0.000394123	0.00216028
LINC00906	-2.87213	-2.71251	0.000397662	0.00217691
AC096888.1	3.91261	-3.61536	0.000400551	0.00219064
CLCA2	2.39865	9.80865	0.000402981	0.00220043
AC079062.1	5.8669	2.56763	0.000404625	0.00220801
LINC01179	4.3869	-1.05111	0.000407454	0.00222064
CCL3L1	2.08223	1.05999	0.000414589	0.00225524
AC096759.2	3.19755	-1.50486	0.000415449	0.00225921
AL033384.1	2.06902	3.35858	0.000416207	0.00226262
TGFBR3L	2.35561	1.60502	0.000416786	0.00226505
AC026355.1	2.67514	-0.177364	0.000419486	0.00227829
UBE2U	-2.45678	-0.760298	0.000421667	0.00228764
TEX41	2.72876	2.22408	0.000421739	0.00228764
AC100801.1	5.22956	1.52156	0.000430983	0.00232826
AC004801.3	-2.68857	-3.66126	0.000434375	0.00234437
LINC01640	-2.34668	-3.58156	0.000440294	0.00237301
TCAM1P	3.11597	0.58012	0.000444349	0.00238848
INHBE	2.04491	0.183128	0.000448168	0.00240367
LINC01305	2.5837	0.0772344	0.000448253	0.00240367
LINC01460	2.60427	-0.584083	0.00044843	0.00240367
AC008109.1	6.53807	-1.0664	0.000459219	0.00245463
AC131254.1	2.33174	-2.34223	0.000460211	0.00245764
LINC01249	4.84581	0.237012	0.00046425	0.00247461
FAM83A	2.8499	8.62352	0.000468685	0.00249286
AC091170.1	3.92897	0.614971	0.000470471	0.00250004
BMS1P17	2.67918	-1.83388	0.000475352	0.00252131
LINC01206	6.05764	6.22452	0.000504297	0.00265279
SLC28A3	2.22789	5.00147	0.000510449	0.00268106
LINC01914	2.2298	-1.32954	0.000514501	0.00269741
CYP4F30P	-2.28428	-3.29543	0.000519115	0.0027183
AC116021.1	2.29419	-2.46568	0.000525693	0.00274773
LINC01456	3.47355	-1.42968	0.000535525	0.00279573
INHA	3.04791	2.09559	0.000541413	0.00281964
ESRG	4.63514	3.94303	0.000544619	0.00283376
AC005993.1	2.33966	-0.0958779	0.00055316	0.00287213
TTLL11-IT1	2.78584	-1.10261	0.000555946	0.00288325
AC051619.8	-2.41514	-3.36782	0.000555971	0.00288325
DNAH17	2.09652	6.5433	0.000560574	0.00290194
TMEM155	3.55373	0.650695	0.000563953	0.002915
AC090735.1	4.47824	-1.88052	0.000567622	0.00292961
LINC00973	3.9923	-2.13981	0.000578817	0.00297576
AC027449.1	-2.01578	-3.60296	0.000582099	0.00298996
AC012501.1	2.55521	-1.29762	0.000585923	0.00300565
NKAIN3-IT1	-2.12435	-0.426283	0.000586314	0.00300565
LINC01959	4.08924	-2.90282	0.000591272	0.00302535
LINC01901	3.94771	-0.679673	0.000601316	0.00306982
AL021877.2	3.53233	1.21714	0.000603949	0.00307833
AC012213.4	2.57032	-0.845556	0.000608845	0.00309871
AC019211.1	2.25339	-2.2941	0.000613113	0.00311583
PLUT	-2.34741	-3.25543	0.000614021	0.00311952
LRAT	3.23229	4.56301	0.000618929	0.00313983
AL137803.1	2.34112	-0.523862	0.000624037	0.00316148
TMEM105	2.22113	1.0392	0.00062537	0.00316598
NIPAL4	2.31097	6.26602	0.000633168	0.00320264
AC007848.1	2.23961	-0.013517	0.000652681	0.00328883
OFCC1	2.50608	0.449875	0.000662731	0.00332872
LINC01510	-2.04948	-3.23126	0.000667143	0.00334601
AL391704.1	3.26452	-2.1345	0.000671241	0.00336069
AC079949.2	2.21246	2.34512	0.000671439	0.0033607
CASC16	-2.60523	-3.05713	0.000671756	0.00336132
LINC01546	2.72592	-1.97674	0.00069204	0.0034478
LINC01416	2.34803	-1.92166	0.000697972	0.00346933
HES2	2.14897	6.91802	0.000724458	0.00358855
ELDR	2.47537	-1.4077	0.000744005	0.00367482
FOXCUT	2.65572	-2.42188	0.000746989	0.00368533
PAX3	4.0418	0.724135	0.000753269	0.00371313
AL118508.2	2.71677	-1.66468	0.000759574	0.00373951
LINC00839	2.14641	2.92581	0.000766046	0.00376641
AC087855.2	-3.10699	-3.32075	0.000790425	0.00387411
TP53TG3D	2.67385	-0.893302	0.000796818	0.00390212
CHRNA9	4.41843	1.5941	0.000798476	0.00390802
TCN1	-2.08883	4.52493	0.000812465	0.00396298
HRG	2.56955	-0.462896	0.000816256	0.00397922
AC099518.6	2.02194	0.015581	0.000821467	0.00399783
COL22A1	2.68146	4.12514	0.000829497	0.00403236
AC104564.2	2.47268	-1.95344	0.000844357	0.00409536
PANTR1	-2.65771	-2.58154	0.000846299	0.00410131
TPRXL	2.05228	5.08851	0.000864746	0.00417544
LINC00601	4.33554	-1.98294	0.000866401	0.00417992
LINC00113	-2.25784	-3.38612	0.000866833	0.00418084
FAM238B	-2.17686	-2.6991	0.000872196	0.00420318
SPACA3	-2.05367	-3.2915	0.000884412	0.0042549
FAM19A5	2.09673	3.21682	0.000888116	0.00426806
LINC01518	4.2729	-0.243985	0.000904375	0.00433588
AC123912.4	-2.16363	-1.56884	0.000910258	0.00435372
Z99774.1	2.38414	-3.21171	0.000920176	0.00439507
AP000525.1	2.05051	-0.351173	0.000924134	0.00441153
AC092167.1	2.90739	-2.61823	0.000924528	0.00441218
AC128709.3	3.15875	-0.48575	0.000931387	0.00444122
AC064802.1	2.41714	-2.37283	0.00093194	0.00444263
LEMD1	2.12056	2.36441	0.000967317	0.00458717
AL606970.3	-2.03335	-3.13385	0.000981231	0.00464166
LINC02607	2.64883	-1.43859	0.00098554	0.00465788
AC092130.1	3.52495	-3.78606	0.000989118	0.00466734
BLACE	2.20891	-2.38877	0.000997819	0.00470463
LINC01524	2.39177	-1.67526	0.00101676	0.00477768
ADGRD2	2.07289	0.525058	0.00103293	0.0048397
LINC01096	2.38886	-0.524013	0.00104177	0.00487798
AP000879.2	2.78034	-0.609067	0.00104303	0.00488175
ZNF114-AS1	2.25245	-2.45133	0.00104779	0.0048987
AC005330.1	2.09754	-0.434241	0.00105487	0.00492642
C12orf80	2.52901	-2.95388	0.00105634	0.00493195
AC091588.2	-2.0694	-3.67619	0.0010581	0.00493753
AC108174.1	3.66242	-0.915622	0.00106331	0.00495913
ZPLD1	2.04411	-0.606187	0.00106979	0.00498665
AC007785.1	2.62447	0.501176	0.00107672	0.00501216
LINC00615	4.68303	-2.45934	0.00108198	0.00503259
AL359382.1	-2.01008	-3.05084	0.00110638	0.00512629
LINC01419	3.78909	-2.09412	0.00110688	0.00512629
CDH26	2.23789	3.93668	0.00110938	0.00513399
KHDC1L	3.41318	1.55689	0.00112167	0.00518083
ENTHD1	2.47935	-0.0226768	0.0011262	0.00519701
Z82196.2	4.08285	-3.53136	0.00113345	0.00522456
HOXC10	2.05841	4.26458	0.00114741	0.00527852
AJAP1	2.75758	3.47985	0.0011659	0.00534646
VNN3	2.81104	2.00385	0.00117465	0.00537944
ZIC1	3.6451	3.01794	0.00117826	0.00539308
AC024084.1	2.61498	-2.5189	0.00118051	0.00540053
CCDC144NL	4.36268	0.171524	0.0012077	0.00550446
TBX4	2.3741	1.09289	0.00120876	0.00550636
AC037441.2	-2.37812	-3.71503	0.00122638	0.0055775
AL355974.2	3.15988	-0.304404	0.00122809	0.00557968
AL590644.1	2.76411	-0.55248	0.00124335	0.00564158
AC091182.2	2.17553	1.60416	0.00128584	0.00580075
MAFA	2.01144	0.54054	0.00128831	0.00580887
RHAG	-2.31275	-3.03002	0.00129657	0.00584151
AC008443.3	2.96396	-0.654086	0.00131416	0.00590755
AC109462.2	3.50661	-2.67027	0.00131955	0.00592924
LINC01060	2.04323	-0.80564	0.00132074	0.00593179
AC013762.1	3.23701	-2.91196	0.00134553	0.00601806
ANKRD20A19P	5.46955	1.4818	0.00134928	0.0060301
GLDC	2.5651	3.64396	0.001351	0.00603626
LINC00355	3.5734	0.916796	0.00140857	0.00626744
AP001547.1	4.48175	-0.951388	0.00140951	0.00627005
TMEM52B	2.74376	2.14963	0.00141568	0.00629097
AC105460.1	4.44846	4.38194	0.00142834	0.00633905
LINC00665	2.04652	5.21318	0.00143063	0.00634617
AC004704.1	3.70113	-2.19038	0.00146541	0.00648022
AC034223.2	3.95809	-0.181584	0.00150228	0.00661443
AC128709.1	2.50706	-0.500143	0.00150436	0.00662021
RPL30P11	3.01335	-0.394677	0.00151267	0.00665335
LINC02031	2.8621	0.364721	0.00153135	0.0067218
AC093843.1	2.51533	-3.55428	0.0015427	0.00676298
AC108865.1	4.05035	-0.336134	0.00154922	0.006786
LINC02006	2.20685	1.91614	0.00154952	0.006786
LINC01691	2.13219	-2.48294	0.00156163	0.0068373
CHIT1	3.04992	3.29395	0.0015723	0.0068805
LY6K	2.0986	4.74361	0.0015753	0.00688839
AC026785.3	3.47017	-1.05414	0.00159956	0.00698209
LINC02257	2.08188	-1.4907	0.00162436	0.00707007
LINC01839	-2.21771	-3.73911	0.00171198	0.00740154
ADD2	2.29018	4.56438	0.00173436	0.0074889
AC011131.1	3.20328	-3.1963	0.00175779	0.0075787
AC239799.2	2.48977	-2.66157	0.00179049	0.00769654
AC008663.1	3.95487	-0.797995	0.00179777	0.00772207
LINC00964	2.13542	1.69975	0.00183176	0.00783293
AC025575.2	2.3692	1.51772	0.00183984	0.0078636
AC245187.1	-2.44498	-3.7574	0.00184115	0.00786724
AC022915.3	3.11683	-3.53547	0.00184509	0.00788213
AC078845.1	2.52859	-0.886863	0.00185047	0.00789921
MANCR	2.06905	1.09855	0.00187432	0.00799311
AL133467.2	3.81314	-2.80987	0.00189335	0.00805235
MEGF10	2.10751	2.14891	0.00189689	0.00806341
PNLDC1	3.13147	2.43482	0.00190838	0.00810627
LINC02434	4.46793	-0.976584	0.00191092	0.00811306
GS1-24F4.2	2.30005	-1.75152	0.00192905	0.00817593
PARAL1	3.10107	-2.09231	0.00196349	0.00830351
AC007128.2	2.16311	-0.605808	0.00197095	0.0083228
AC073062.1	-2.42091	-3.52276	0.0019929	0.00840519
SLCO1A2	2.31855	3.59897	0.0019982	0.00842343
LINC01139	2.87491	2.69836	0.00200413	0.00844431
KCNG1	2.19231	4.32765	0.00211786	0.00885206
MESP2	2.45577	0.965722	0.00214752	0.00896517
AC068473.3	2.4962	1.89247	0.0021686	0.00903128
LINC02292	-2.22326	-3.82634	0.00219247	0.00911529
LINC01647	3.02088	-3.30787	0.00220989	0.0091687
SERPINA9	3.59172	-0.345649	0.00223185	0.00924776
MAEL	3.95743	2.19309	0.00234312	0.00966234
AC093159.1	2.81083	-0.125095	0.00236772	0.00974981
CASC20	3.01241	0.449179	0.00236963	0.00975533
LGALS17A	2.96601	0.18362	0.00238482	0.00980851
AC002401.4	2.71342	-0.384785	0.00244097	0.0100036
C20orf197	2.83235	1.601	0.00246722	0.010092
AC007731.2	3.50702	-3.79245	0.0024708	0.0101043
AC093496.1	3.68203	-2.78421	0.00251745	0.0102561
AC100826.1	-2.33677	-3.34667	0.00252861	0.0102942
LINC00540	2.97679	1.0792	0.00255911	0.0103963
LINC02345	2.09131	0.452778	0.00258972	0.0104959
AC090282.1	2.32678	-1.5637	0.00260276	0.0105414
AP005436.3	2.94511	-3.62423	0.00261785	0.0105925
LINC00941	2.14498	2.10532	0.00264875	0.0107024
AC015712.6	2.23179	1.00687	0.0026824	0.0107979
LINC01287	4.11212	1.37834	0.00270277	0.0108697
ADGRE1	2.23477	1.54939	0.00271937	0.0109212
MLIP	2.07465	2.41235	0.0027763	0.0111058
AC013451.1	2.12527	-3.11198	0.00278146	0.0111213
PHF2P2	4.11037	-0.127085	0.00279606	0.0111745
IGFL4	2.40379	1.75159	0.00287679	0.0114467
LUZP2	2.17055	1.81182	0.00291146	0.011552
AC112493.1	3.00859	-2.48308	0.00293064	0.0116127
SFTA1P	2.27105	-1.51001	0.00295599	0.0116957
AP003555.2	3.08361	2.43235	0.00297558	0.0117611
LINC01956	2.70364	-0.906946	0.00301242	0.011878
LINC00504	2.05677	2.93489	0.00302947	0.0119303
AC024230.1	3.01345	-1.43102	0.00308571	0.0120964
LINC00237	3.20386	-2.93093	0.00309485	0.012124
AL365271.1	-2.01503	-3.60727	0.00310582	0.0121587
AC010255.3	2.17527	-2.64427	0.00311534	0.0121904
AC009081.1	4.20145	-2.87094	0.00311972	0.012202
LINC01160	2.22101	1.72246	0.00313612	0.0122495
AC093515.1	4.72789	-2.16149	0.00319068	0.0124204
AC022164.1	3.00935	-3.00203	0.00325802	0.0126539
LINC01644	-2.02074	-0.560043	0.0033582	0.0129728
AC090192.2	2.56181	-1.60818	0.00341492	0.0131743
AL355607.1	2.41345	-2.0678	0.00341561	0.0131743
AC005355.1	2.08126	-1.20311	0.00341571	0.0131743
AC108676.1	2.45397	2.50198	0.00346425	0.0133178
IRX4	2.05123	6.15375	0.00349211	0.013409
AC093833.1	3.70718	-3.70915	0.00350763	0.0134536
LINC01068	2.47386	-0.991748	0.0035595	0.0136323
ELFN2	2.4247	0.818511	0.00362067	0.0138164
NETO1	2.28924	1.27476	0.00362515	0.0138243
OTP	2.39758	-1.93776	0.00369808	0.014062
FAM237A	3.16936	-2.7935	0.00370407	0.0140786
MED15P9	3.34126	-1.11226	0.00376434	0.0142824
AC011595.2	2.00542	-3.18362	0.00380693	0.0144091
AC099518.1	2.00309	-0.715106	0.00385611	0.0145506
AC079467.1	-2.00165	-2.48461	0.00390418	0.0147029
AC025271.3	-2.01237	-3.51648	0.00397248	0.0149211
AL589182.1	3.89275	-2.78076	0.00406321	0.0151923
TKTL1	5.41607	3.16535	0.00410866	0.0153423
AC005357.2	-2.05541	-3.6135	0.00411692	0.0153631
ADGRD1-AS1	3.58298	0.92548	0.00413673	0.0154158
FLJ42969	2.0808	-0.242746	0.00413694	0.0154158
AL138881.1	3.08053	-0.71959	0.00417437	0.0155405
AC106712.1	2.75244	-2.583	0.00421033	0.0156473
GATA3-AS1	2.21297	-2.38219	0.00428352	0.0158851
AL161640.1	3.60647	-3.29377	0.00428767	0.015897
RPS3AP23	2.14196	-2.66239	0.00433027	0.0160205
AC055758.2	4.75147	0.0370675	0.00439684	0.016232
RNF17	3.07557	-0.0473196	0.00444985	0.0163925
AC109439.2	4.71369	-2.18292	0.00445435	0.0163986
FLJ36000	5.6158	-1.36325	0.00448392	0.0164934
AC004009.1	-2.502	-3.5736	0.00449424	0.0165207
AC083967.1	6.93579	0.483567	0.00456249	0.0167253
AC129926.1	2.09172	-2.19211	0.00458171	0.016785
PICSAR	3.36116	1.36156	0.00460647	0.016861
APCDD1L-DT	2.24449	1.66827	0.0046123	0.0168748
AL157373.2	2.89511	0.0421478	0.00467028	0.0170623
UGT2A1	3.28732	-1.0139	0.00467931	0.0170844
AC138904.1	2.04365	-0.255214	0.00471376	0.0171993
AC012038.2	3.42827	-3.82235	0.0047176	0.0172097
HERC2P4	2.25592	0.212494	0.00475812	0.0173281
LINC01446	5.1025	-0.0228434	0.00477343	0.0173729
ABCA4	3.27852	5.06145	0.00481663	0.017519
AL445072.1	2.5402	-2.5754	0.00491809	0.0178466
AC044839.3	4.93283	-2.00395	0.00494475	0.0179166
AC080129.1	3.00699	-1.90147	0.005025	0.0181466
LINC01142	2.09841	-3.29975	0.00505412	0.0182289
NMRAL2P	2.49177	6.44646	0.00506761	0.0182587
AL162411.1	2.2319	-1.39583	0.00509286	0.0183374
CCDC194	2.12637	-1.1439	0.00513504	0.0184551
NEFM	2.87327	3.87839	0.00516521	0.0185326
LINC01995	3.41269	-1.93932	0.00518739	0.0185928
FAM178B	2.36439	2.6968	0.00521882	0.0186899
MAL	-2.14474	8.36538	0.00535001	0.0190804
AC090125.1	3.14903	-2.49321	0.00538305	0.0191705
C10orf90	2.39927	-0.485337	0.00545514	0.0193872
LINC00470	2.73502	1.39617	0.00547317	0.0194272
LINC02029	2.45072	-2.79861	0.00549163	0.0194767
LINC01391	2.51068	-0.366269	0.00550631	0.0195167
LINC00911	3.31622	-2.77659	0.00551216	0.0195323
LINC01322	2.49429	1.73182	0.00554081	0.0196206
AL109954.2	2.06975	-3.0888	0.0055664	0.0196892
LINC01539	2.03581	-2.06553	0.0056081	0.0198164
ASB5	-2.06906	2.62125	0.00576705	0.020297
LINC01992	-2.21676	-1.42215	0.00579161	0.0203687
SPINK7	-2.12505	5.73753	0.00583387	0.0204964
LINC02128	3.11305	-2.20379	0.00603015	0.0210487
LINC01228	4.73409	-2.05973	0.00604468	0.0210815
GLRA3	2.04621	0.239828	0.00604687	0.0210815
AC124861.1	2.27053	-3.00829	0.00607769	0.0211718
AC087667.1	2.42583	-1.92687	0.00608847	0.02119
LINC02466	2.4978	-0.301232	0.0061135	0.0212536
AC111149.2	5.65781	0.775192	0.00620629	0.0215371
AC116609.1	2.63664	-2.83352	0.00627397	0.0217369
AC019117.1	2.68655	0.85529	0.00635408	0.0219791
RFTN1P1	4.10411	-2.86377	0.00636646	0.0220175
AC034154.1	2.67983	-2.25618	0.00649288	0.0223469
LINC02109	2.61221	-0.830577	0.00652356	0.0224214
AL121904.1	4.23178	-3.45797	0.00656396	0.0225422
LINC02539	2.00585	-3.12582	0.00661689	0.0227104
AC092484.1	7.92729	1.73592	0.0066693	0.022872
LINC01667	4.39613	0.725463	0.00672831	0.0230423
AP005057.1	5.34136	-2.7741	0.00675295	0.0231155
AC108865.2	4.06721	-1.10058	0.00677657	0.02318
LINC02417	2.30796	-3.22694	0.00681075	0.023283
AP000439.3	3.42922	-1.94073	0.00687574	0.0234958
AF015262.1	2.62058	-2.93142	0.00699635	0.0238701
AC022140.1	3.77426	-2.75779	0.00703275	0.0239706
LINC02470	3.25941	-2.0179	0.00704862	0.0240105
BRDT	3.57009	2.46545	0.00710918	0.0241616
AL591501.1	2.77191	-1.37368	0.0071935	0.0243751
AC019155.3	2.70151	-0.507732	0.00730104	0.02468
MIR548XHG	4.4616	0.0561522	0.00742274	0.0250178
AC104071.1	4.68337	-2.63066	0.00748982	0.0252041
FABP4	3.33555	7.04182	0.00756281	0.0254005
SLC6A14	2.38703	5.35408	0.00756884	0.0254108
LINC01351	3.2029	-2.95739	0.00758913	0.0254591
LINC01100	-2.12763	-2.99128	0.00761944	0.0255459
AC104695.1	2.68607	-3.42205	0.00772433	0.0258372
MYO3A	2.3826	2.80175	0.00775119	0.0258895
SNHG27	3.89748	-2.20447	0.00776392	0.0259244
AC003092.1	2.30364	-2.23735	0.00811718	0.0268748
AC004921.1	2.33677	-0.560286	0.00823527	0.0271875
DNAJB3	2.45254	-1.00007	0.00824858	0.0272209
ANO4	2.23749	0.552196	0.00837114	0.0275673
AC021785.1	2.74168	-2.68255	0.0084543	0.0278252
AL357558.2	3.74788	-3.68902	0.00862038	0.0282835
AC055758.1	4.79639	-0.482009	0.00870181	0.0284821
AP001180.2	3.23697	-3.89341	0.00871833	0.0285199
AC006372.3	2.67892	-1.79308	0.00873729	0.0285711
DCC	3.13797	3.29747	0.00874543	0.0285869
LINC00557	2.24342	-3.34763	0.00886943	0.0289264
AP005229.2	4.44332	-2.58886	0.00892338	0.0290803
AC021683.3	2.20144	-1.00716	0.00892745	0.0290881
LINC01705	2.03654	0.133107	0.00893751	0.0291043
LINC02241	3.60455	0.1224	0.00903329	0.0293386
AC034223.1	2.9277	-0.94629	0.00907241	0.0294379
AC093865.1	2.22261	-1.96222	0.0091022	0.0295235
IL1RAPL2	2.32284	-1.04754	0.00926286	0.0299656
AC006482.1	4.00911	-3.56826	0.00934596	0.0301722
AL355303.1	2.12295	-2.19443	0.00952414	0.0306155
LINC02377	4.0694	-0.584869	0.00985589	0.0315641
AC124254.1	2.67639	-1.99977	0.00991791	0.0317156
LINC01925	3.64313	-1.92161	0.0100995	0.0322244
GAL	2.25618	4.19627	0.0102065	0.0325059
AC096711.1	4.14156	-2.99084	0.0102279	0.0325639
LINC01746	-2.32876	-3.82499	0.0102285	0.0325639
MYL7	4.6906	0.256598	0.0103214	0.032782
LINC-ROR	2.00665	-3.56388	0.0103237	0.032782
AC008708.1	3.64558	-1.49085	0.0103738	0.0328927
AL133467.4	3.82381	-3.09502	0.0103788	0.0329024
AC107419.1	2.52946	-1.43646	0.0105206	0.0332418
DISP3	2.16232	1.07348	0.0105808	0.0334077
AC073359.1	3.59797	-3.75347	0.0106449	0.033573
ZIC4	2.76317	1.62409	0.0109021	0.034264
CCNYL2	2.64118	0.714388	0.0110381	0.0346169
LHFPL1	2.29212	-0.701316	0.0110937	0.0347658
GLYATL2	2.34699	1.47551	0.0110978	0.0347723
AC093599.1	2.17138	-1.5963	0.0111555	0.0349216
AL133372.2	2.64368	-2.33078	0.0112669	0.0352317
AC093627.1	2.72116	-2.42701	0.0113493	0.035406
AC106771.1	4.24876	-2.05296	0.0114846	0.0357534
MMP20	2.74856	-1.42881	0.011488	0.0357545
CFAP47	2.08706	0.942638	0.0115085	0.0357989
AP000561.1	3.71775	-3.23366	0.0116012	0.0360224
AL121656.1	2.60128	-2.92231	0.0116012	0.0360224
LINC00607	2.61178	0.975287	0.0117531	0.0364216
AC027338.2	2.29402	-3.28115	0.0118459	0.0366698
AC022639.1	2.73863	-1.17282	0.0119231	0.0368622
AC244502.3	2.68325	-3.13799	0.0121712	0.0374823
LINC00308	3.35155	-3.10528	0.0121872	0.037524
AL445647.1	4.18111	-1.0925	0.0122345	0.0376293
VGLL1	2.07132	1.37269	0.0123213	0.0378221
AL357143.1	2.81445	-1.22234	0.0123682	0.0379434
AC130710.1	-2.05485	-3.4295	0.0124372	0.0380964
AC010343.3	2.61965	0.865848	0.0126339	0.0385825
CEACAMP10	2.67529	-2.23682	0.0127464	0.0388777
AC078842.1	3.04906	-3.29192	0.0128644	0.0391543
AC002351.1	2.88394	-2.44482	0.0128739	0.0391626
REG1CP	-2.21082	-3.49492	0.0129489	0.0393699
AC023824.3	3.93838	-1.38281	0.0129806	0.0394454
CSAG4	4.03258	-2.20224	0.0130104	0.039515
AC090503.2	2.76279	-2.98017	0.0130636	0.0396555
KCNIP4-IT1	2.41701	-2.16844	0.0131034	0.0397276
LINC01033	3.3745	-0.619375	0.0131306	0.0397696
AC110741.1	2.41504	-3.63158	0.0131783	0.0398913
AC006372.1	3.00372	-2.40977	0.0133226	0.0402362
AL513304.1	3.89895	-0.701229	0.0137055	0.0411905
AC112178.1	3.0259	-1.99833	0.0137231	0.041233
NAA11	4.16046	0.237626	0.0137595	0.0413083
AC008163.1	5.84678	-0.273399	0.0137614	0.0413083
FGB	-2.41076	2.85544	0.0138957	0.0416387
LINC01193	5.35238	-1.68941	0.0142087	0.0424145
LYZL4	-2.03294	-3.64232	0.0142571	0.0425441
AC099344.1	-2.03253	-3.84782	0.01434	0.0427175
CU639417.4	3.17622	-3.25581	0.0144129	0.0428754
AC008517.1	4.27839	-2.00309	0.0148784	0.0439993
CNTNAP2	2.11713	5.48092	0.0149635	0.044193
FAM71F1	2.30032	-0.583861	0.0150007	0.0442748
LINC01151	2.57527	-3.11039	0.0150964	0.0445244
LINC00200	4.90106	-1.68222	0.0154085	0.0453502
FGF4	4.39941	1.47067	0.0154106	0.0453502
AL139275.1	-2.36789	-3.6571	0.0155333	0.0456257
AP001476.3	2.51416	-3.58004	0.0159432	0.0465913
AL136131.2	2.17011	-2.89003	0.0159857	0.0466682
AC012462.1	3.75862	-3.68594	0.016171	0.047112
LINC01602	3.69059	-1.89524	0.0164793	0.0478658
LINC01727	2.32605	-3.43277	0.0165583	0.0480791
AL360181.4	2.17271	-3.67266	0.0166806	0.0483772
AC087612.1	2.72491	1.03767	0.0168297	0.0487276
AC097374.1	3.26398	0.0133248	0.0168707	0.0487971
RHOXF1P1	3.33146	-2.8106	0.0168878	0.0488219
C4orf51	2.36081	-1.18675	0.0171253	0.0493347
LINC01854	4.27079	-0.840487	0.0171825	0.0494416
AC004920.1	2.04315	-2.66293	0.0171955	0.0494709
AC005863.1	2.30505	-0.676227	0.0174057	0.0499516

## Sheet: miRNA
The list of Differentially expressed miRNA
miRNA	logFC	logCPM	PValue	FDR
hsa-miR-194-5p	-6.23055	10.54	2.21471e-135	1.55472e-132
hsa-miR-215-5p	-7.93693	7.16396	4.11748e-134	1.44524e-131
hsa-miR-192-5p	-6.3394	11.6661	7.12118e-133	1.66636e-130
hsa-miR-194-3p	-6.56601	4.01301	1.27991e-113	2.24625e-111
hsa-miR-192-3p	-6.12799	3.28394	3.81581e-91	5.3574e-89
hsa-miR-148a-3p	-3.07482	14.9829	2.27885e-46	2.66626e-44
hsa-miR-375-3p	-5.77427	13.2836	4.07187e-36	4.0835e-34
hsa-miR-338-3p	-2.31355	9.23733	4.55425e-34	3.99636e-32
hsa-miR-153-5p	-3.3245	3.44163	6.90565e-31	5.3864e-29
hsa-miR-215-3p	-6.9592	0.466739	2.98753e-28	2.09725e-26
hsa-miR-29b-2-5p	-2.31111	4.5469	6.84464e-27	4.36812e-25
hsa-miR-338-5p	-2.342	2.23351	7.25456e-23	4.24392e-21
hsa-miR-204-5p	-4.11193	3.19511	9.59895e-23	5.18344e-21
hsa-miR-153-3p	-3.15048	1.23463	7.2113e-22	3.61595e-20
hsa-miR-139-5p	-2.29714	5.81855	1.90809e-21	8.92986e-20
hsa-miR-378c	-2.03319	3.28533	2.95644e-20	1.29714e-18
hsa-miR-1468-5p	-2.44143	2.28917	4.67097e-19	1.92883e-17
hsa-miR-202-5p	-3.64413	-0.131358	2.34743e-18	9.15499e-17
hsa-miR-205-3p	4.11631	2.6735	1.23604e-16	4.1319e-15
hsa-miR-148a-5p	-2.01816	4.94392	2.43215e-16	7.76078e-15
hsa-miR-224-5p	4.01408	7.68002	3.2685e-15	9.97602e-14
hsa-miR-4652-5p	4.25151	2.23022	2.96751e-14	8.67996e-13
hsa-miR-135a-5p	-3.70964	1.29359	3.53827e-14	9.93547e-13
hsa-miR-129-2-3p	-2.86063	-0.263947	2.25378e-13	6.08522e-12
hsa-miR-452-3p	3.38346	3.59115	1.84816e-12	4.47383e-11
hsa-miR-708-5p	2.44415	6.68958	1.88858e-11	3.5832e-10
hsa-miR-205-5p	3.61716	13.5878	5.99306e-11	1.05178e-09
hsa-miR-490-3p	-3.78085	2.89553	1.78644e-10	3.05874e-09
hsa-miR-452-5p	2.70183	7.81183	4.42474e-10	7.22365e-09
hsa-miR-6499-3p	3.88253	1.50555	3.09681e-09	4.34792e-08
hsa-miR-944	3.86628	7.87639	3.93732e-09	5.4196e-08
hsa-miR-767-5p	7.72375	5.90175	1.2379e-08	1.5518e-07
hsa-miR-133a-3p	-2.57996	6.49296	1.60847e-08	1.88192e-07
hsa-miR-105-5p	6.8009	6.09517	1.06106e-07	1.12859e-06
hsa-miR-210-3p	2.08112	9.66667	1.6983e-07	1.67916e-06
hsa-miR-224-3p	2.43284	2.28566	3.65261e-07	3.41884e-06
hsa-miR-4664-3p	4.16503	-0.0464957	6.12041e-07	5.23967e-06
hsa-miR-552-5p	-2.89053	-0.266962	9.67896e-07	7.90074e-06
hsa-miR-431-5p	2.72256	1.16981	1.51479e-06	1.18154e-05
hsa-miR-937-3p	2.60651	1.65102	2.04269e-06	1.53989e-05
hsa-miR-1910-5p	3.4681	0.298562	2.06196e-06	1.53989e-05
hsa-miR-34c-5p	3.40978	4.82313	2.39658e-06	1.73443e-05
hsa-miR-1293	3.22825	1.68879	8.11053e-06	5.22348e-05
hsa-miR-767-3p	5.01455	0.447841	9.10623e-06	5.70766e-05
hsa-miR-636	3.40748	-0.377559	4.06878e-05	0.000230346
hsa-miR-6499-5p	2.27022	1.9499	4.24295e-05	0.000238284
hsa-miR-1304-3p	4.4462	0.568628	4.42954e-05	0.000246789
hsa-miR-3690	2.38915	0.196869	4.48371e-05	0.00024784
hsa-miR-6728-5p	3.39737	-0.389707	5.41804e-05	0.000292619
hsa-miR-1269a	4.75743	7.17551	8.44161e-05	0.000438964
hsa-miR-2277-3p	2.59126	-0.377869	8.65266e-05	0.00044663
hsa-miR-483-5p	2.04998	0.630875	0.000109014	0.000556165
hsa-miR-133a-5p	-2.09434	0.141658	0.000113016	0.000570769
hsa-miR-34b-3p	2.73281	2.27207	0.000120474	0.000599807
hsa-miR-34c-3p	2.38299	3.56728	0.000161349	0.000786576
hsa-miR-301b-3p	2.00998	0.894745	0.000198129	0.000915043
hsa-miR-548d-3p	2.72022	-0.343441	0.00030988	0.00133458
hsa-miR-675-3p	2.99134	5.78257	0.000369025	0.00155123
hsa-miR-296-3p	2.63266	0.592777	0.000448096	0.00176721
hsa-miR-516a-5p	3.76947	0.975026	0.000459643	0.00180262
hsa-miR-548f-3p	4.14019	0.969993	0.000469561	0.00183129
hsa-miR-508-3p	3.76236	5.68578	0.000549169	0.00208388
hsa-miR-6891-5p	3.32329	-0.416913	0.000733617	0.00266839
hsa-miR-301b-5p	3.14817	-0.137791	0.000758801	0.00274576
hsa-miR-383-5p	-2.09611	0.181045	0.000916239	0.00318416
hsa-miR-129-1-3p	-2.12968	-0.259615	0.000937898	0.00324337
hsa-miR-519a-5p	3.43223	0.258657	0.00114942	0.00383048
hsa-miR-4449	3.57144	1.15915	0.00146686	0.00472355
hsa-miR-514a-3p	3.74596	4.70553	0.00213592	0.0066346
hsa-miR-1911-5p	4.42609	2.0368	0.00223404	0.00683431
hsa-miR-509-3p	3.66233	4.30978	0.00237534	0.0072027
hsa-miR-34b-5p	2.15784	1.49371	0.00252231	0.00747114
hsa-miR-573	2.59356	-0.172648	0.00273079	0.00792154
hsa-miR-5579-3p	2.36349	0.545181	0.00287446	0.00825063
hsa-miR-4778-3p	3.30753	-0.420176	0.00403459	0.0110636
hsa-miR-6777-5p	2.11181	-0.375697	0.00412236	0.0112603
hsa-miR-4517	2.34121	-0.30348	0.00414982	0.0112914
hsa-miR-5699-3p	2.12748	-0.367422	0.00460625	0.0124849
hsa-miR-508-5p	4.03731	1.10026	0.006821	0.0176042

## Sheet: mRNA
The list of Differentially expressed mRNA
mRNA	logFC	logCPM	PValue	FDR
KCNE2	-9.83947	4.08259	9.13e-159	1.71e-154
GHRL	-8.34667	4.2502	1.21e-147	1.13e-143
ALDOB	-9.67753	4.20757	9.8e-135	6.13e-131
FMO5	-5.74725	4.04171	1.23e-126	5.75e-123
TMED6	-5.77629	1.88701	2.02e-120	7.57e-117
SULT1C2	-8.08514	4.18553	2.83e-112	8.85e-109
VSIG1	-7.10501	5.2929	8.88e-112	2.38e-108
TRIM50	-9.15253	2.42949	3.4e-106	7.96e-103
CYSTM1	-4.66793	6.59866	2.42e-102	5.04e-99
NR0B2	-8.85626	1.82528	5.52e-97	1.04e-93
SMIM24	-7.16898	2.81241	1.25e-90	2.14e-87
C16orf89	-7.7866	3.36789	8.88e-89	1.39e-85
CLDN18	-8.47527	7.05107	1.45e-83	2.09e-80
PBLD	-3.886	3.5406	1.9e-82	2.55e-79
MYRF	-5.56212	5.63983	1.74e-80	2.17e-77
MFSD4A	-6.86111	6.16595	4.51e-76	5.29e-73
AKR7A3	-6.48969	4.57831	2.42e-74	2.67e-71
B3GAT1	-7.2701	3.62221	1.03e-71	1.08e-68
SIGLEC11	-6.42405	1.49155	2.22e-71	2.17e-68
SPINK1	-7.87719	4.71392	2.32e-71	2.17e-68
MYO1A	-6.3857	1.69415	2.75e-69	2.45e-66
SMIM6	-5.51423	-0.0275962	4.55e-68	3.88e-65
ASB11	-8.38543	1.06543	4.42e-67	3.6e-64
IGFALS	-5.84635	1.56124	2.23e-66	1.74e-63
ATP4A	-12.7181	8.91802	7.13e-66	5.35e-63
VSIG2	-7.17589	4.88797	4.53e-64	3.27e-61
IHH	-7.35543	1.49985	5.95e-64	4.13e-61
CDHR5	-5.51338	2.79422	6.73e-64	4.51e-61
LGALS4	-6.57703	4.34377	1.87e-63	1.21e-60
TESC	-5.13728	2.46571	4.07e-63	2.54e-60
NOSTRIN	-3.82506	2.61369	4.79e-63	2.9e-60
KCNQ1	-5.08575	5.51883	1.36e-61	7.94e-59
CDHR2	-5.12135	2.58095	2.5e-61	1.42e-58
C6orf222	-7.15417	1.59329	4.14e-61	2.28e-58
HNF1B	-6.95611	1.7276	4.86e-61	2.6e-58
IYD	-6.71056	1.99127	1.33e-60	6.9e-58
DGKD	-3.29246	5.73186	1.92e-60	9.73e-58
BTNL8	-5.8541	0.14565	2.96e-60	1.46e-57
SLC1A2	-5.52754	2.54952	7.98e-59	3.84e-56
FOXA3	-6.19144	2.39826	1.07e-58	5.01e-56
PTPRN2	-5.00597	3.84732	2.05e-58	9.37e-56
GRIA4	-6.49442	0.987842	1.01e-56	4.53e-54
GPER1	-4.30969	3.2524	2.65e-56	1.16e-53
SLC4A4	-5.67496	3.31478	1.09e-55	4.65e-53
CKMT2	-4.64641	1.68785	1.67e-55	6.97e-53
HNF4A	-6.31908	3.47072	2.48e-55	1.01e-52
SST	-9.06962	2.23551	5.34e-55	2.13e-52
KCNJ13	-4.109	0.219674	6.64e-55	2.59e-52
GPR35	-4.05733	2.05412	6.83e-55	2.61e-52
PTGDR2	-3.91833	-0.0592184	9.73e-55	3.65e-52
SLC5A5	-7.35266	3.72976	1.93e-54	7.08e-52
CAPN9	-6.65915	2.09355	3.58e-54	1.29e-51
ESRRG	-7.02258	4.05951	8.79e-54	3.11e-51
CCKBR	-8.7266	2.80364	1.69e-53	5.87e-51
ACSM3	-4.51843	2.52012	2.31e-53	7.88e-51
APOBEC2	-4.78498	0.421716	2.47e-53	8.25e-51
GATA6	-4.57747	4.50191	3.47e-53	1.14e-50
LRRC66	-4.76659	-0.0393791	1.52e-52	4.91e-50
VILL	-3.96354	3.87022	6.86e-51	2.18e-48
SUCLG2	-2.37037	5.36757	9.99e-51	3.12e-48
SLC26A7	-6.29382	1.93176	1.66e-50	5.1e-48
SERPINA5	-6.03827	2.08988	1.95e-50	5.9e-48
BCL2L15	-5.27796	1.74676	4.14e-50	1.23e-47
MYRIP	-5.59099	2.4812	5.07e-50	1.49e-47
GPA33	-6.03998	1.40636	5.02e-49	1.45e-46
TSPAN8	-6.92811	5.39536	6.01e-49	1.71e-46
FUT9	-8.78846	2.99686	6.31e-49	1.76e-46
A1CF	-5.66745	-0.491594	1.93e-48	5.31e-46
SLC28A2	-6.90482	2.42032	7.93e-48	2.15e-45
MYBPC3	-4.5989	-0.597453	8.07e-48	2.16e-45
PDILT	-10.2592	2.30833	3.11e-47	8.22e-45
SSTR1	-7.31676	2.91943	5.04e-47	1.31e-44
HABP2	-5.45407	0.564038	8.26e-47	2.12e-44
ASAH2	-4.15983	1.56966	1.5e-46	3.79e-44
PLCXD3	-6.75095	2.21124	3.73e-46	9.32e-44
PHGR1	-7.98662	2.28968	6.15e-46	1.52e-43
LEFTY1	-5.52265	-0.540803	7.5e-46	1.83e-43
CNTD1	-3.32292	1.36503	1.03e-45	2.49e-43
CHST5	-5.36132	-0.525113	3.13e-45	7.42e-43
C14orf180	-6.92032	-2.98853	4.15e-45	9.72e-43
TM4SF20	-7.59576	1.71535	5.97e-45	1.38e-42
ESRRB	-5.39069	1.05215	8.11e-45	1.85e-42
GIF	-12.4187	8.39264	1.49e-44	3.37e-42
CHGA	-7.32331	4.13375	2.47e-44	5.51e-42
CLIC6	-5.74933	5.90301	3.01e-44	6.63e-42
CTSE	-8.69954	6.45059	5.32e-44	1.16e-41
SIK2	-2.35268	6.16701	5.52e-44	1.19e-41
GPR155	-3.99965	6.09261	7.76e-44	1.65e-41
HNF1A	-6.09367	1.06439	9.88e-44	2.08e-41
ANGPTL3	-4.6757	0.756917	1.2e-43	2.5e-41
GUCA2B	-9.32897	0.385146	2.61e-43	5.38e-41
CPA2	-8.62495	4.08468	3.59e-43	7.32e-41
BHLHA15	-4.79004	1.03453	2.08e-42	4.19e-40
GKN2	-11.3617	5.74887	3.49e-42	6.96e-40
TFF2	-9.85976	5.95706	3.86e-42	7.61e-40
EPS8L3	-6.90232	2.65848	5.03e-42	9.82e-40
NPC1L1	-4.96343	1.9014	7.03e-42	1.36e-39
FBP2	-5.30342	0.720213	9.02e-42	1.73e-39
CELF3	-4.95237	-1.64545	1e-41	1.9e-39
ATP4B	-12.6114	8.009	1.69e-41	3.16e-39
SULT2A1	-7.62895	0.71378	2.79e-41	5.18e-39
SLC6A19	-7.50937	1.38201	3.21e-41	5.89e-39
PSCA	-7.02811	7.9803	3.93e-41	7.16e-39
NR1I2	-6.05428	0.493932	4.37e-41	7.88e-39
TM4SF5	-6.55787	-0.0971984	5.94e-41	1.06e-38
IQGAP2	-3.86783	4.87497	6.09e-41	1.08e-38
AQP4	-8.43118	3.42736	8.59e-41	1.5e-38
SOWAHA	-4.84286	1.66821	1.13e-40	1.96e-38
PGC	-12.9852	13.1229	1.21e-40	2.08e-38
ARHGDIG	-5.63866	0.748047	1.39e-40	2.37e-38
TMEM229A	-7.27109	-1.08631	1.82e-40	3.07e-38
ACER2	-3.26508	2.95488	2.19e-40	3.66e-38
SLC41A2	-3.67743	3.82248	2.94e-40	4.88e-38
SMPD3	-3.87557	3.42003	4.66e-40	7.66e-38
SULT1B1	-5.99682	4.75165	5.06e-40	8.26e-38
CKM	-6.16536	2.48312	7.13e-40	1.15e-37
CMTM4	-2.62475	5.98199	1.58e-39	2.53e-37
CDH17	-5.50474	3.21805	2.28e-39	3.63e-37
GC	-9.45958	1.59766	3.02e-39	4.75e-37
HDC	-4.57847	1.61724	3.4e-39	5.31e-37
MUC5AC	-8.47464	7.968	3.76e-39	5.82e-37
CHIA	-13.3071	6.2859	6.48e-39	9.95e-37
PDGFD	-3.65851	3.27685	9.79e-39	1.49e-36
JADE1	-2.5584	4.96119	1e-38	1.52e-36
CYP2C8	-5.09006	0.525923	1.2e-38	1.8e-36
NBPF12	-2.75734	4.12379	1.45e-38	2.15e-36
DEPTOR	-3.65594	3.63241	1.5e-38	2.22e-36
PNPLA7	-3.44459	2.91029	1.57e-38	2.3e-36
C2orf72	-4.81137	2.01944	1.62e-38	2.36e-36
RHOU	-3.33782	4.00348	2.13e-38	3.07e-36
NKX6-2	-6.6135	-0.609113	4.84e-38	6.92e-36
TNNC1	-4.31519	-1.28748	5.45e-38	7.74e-36
SLC44A4	-5.67055	5.02819	9.59e-38	1.35e-35
GKN1	-12.2272	9.20358	1.63e-37	2.28e-35
KL	-4.00922	1.47841	1.75e-37	2.43e-35
GPRC5C	-3.68938	5.71616	1.96e-37	2.7e-35
PEBP4	-5.42596	-0.184249	2.5e-37	3.42e-35
RGN	-4.35891	0.821436	3.74e-37	5.08e-35
MT1G	-5.15974	5.7015	4.26e-37	5.74e-35
PTGER3	-4.34796	4.17565	7.53e-37	1.01e-34
ARHGEF38	-3.88456	1.0415	1.04e-36	1.38e-34
C9orf152	-5.48337	3.19414	1.05e-36	1.38e-34
PRDM16	-4.53156	3.19088	1.25e-36	1.64e-34
REG1A	-9.39933	6.54516	1.64e-36	2.13e-34
UGT2B15	-7.70461	1.89716	2.53e-36	3.27e-34
ANKS4B	-5.53953	0.167034	3.58e-36	4.6e-34
HMGCS2	-7.37869	4.02395	5.87e-36	7.48e-34
MYO7B	-4.87833	3.19655	6.12e-36	7.76e-34
SERPINA4	-7.77507	1.6439	6.47e-36	8.14e-34
P2RY14	-3.90375	2.17878	8.13e-36	1.02e-33
PTGER2	-4.225	2.38507	1.09e-35	1.35e-33
ERO1B	-3.53417	4.84947	1.46e-35	1.8e-33
GRIP2	-4.04898	2.10077	2.35e-35	2.88e-33
RAB11FIP2	-2.16144	4.7637	5.76e-35	7.02e-33
PGA5	-12.7468	9.50453	8.4e-35	1.02e-32
MAGI1	-2.5093	5.23453	2.04e-34	2.45e-32
GJB1	-6.30102	1.56041	2.38e-34	2.84e-32
HID1	-3.63963	4.96785	2.5e-34	2.97e-32
CLCNKA	-5.44505	0.417224	4.55e-34	5.37e-32
ST8SIA3	-5.01897	-2.89474	1e-33	1.17e-31
AC009163.2	-6.01444	-3.694	1.08e-33	1.26e-31
DCAF12L1	-7.72305	-1.40836	1.28e-33	1.49e-31
FGD4	-2.77135	5.46713	1.45e-33	1.67e-31
PRR26	-3.7878	1.14694	1.7e-33	1.94e-31
PLIN5	-4.55352	1.65768	2.51e-33	2.85e-31
GPT	-3.25581	1.76773	2.63e-33	2.97e-31
SLC39A5	-5.0055	0.329642	3e-33	3.37e-31
MUC13	-6.10094	4.54873	3.74e-33	4.17e-31
CFC1	-7.24312	-2.71311	5.4e-33	5.99e-31
PALM3	-4.92337	1.80962	6.08e-33	6.71e-31
REPS2	-3.46897	3.97729	6.42e-33	7.03e-31
CA4	-5.49267	-0.994322	6.93e-33	7.56e-31
LRRC31	-6.16539	1.01699	7.02e-33	7.61e-31
SIDT2	-2.09568	5.8314	8.94e-33	9.63e-31
PRR15L	-4.67392	3.68571	1.09e-32	1.17e-30
PDIA2	-6.66752	4.19621	2.56e-32	2.73e-30
LIPF	-13.2067	12.919	2.8e-32	2.97e-30
SLC43A1	-3.44878	3.39038	2.87e-32	3.02e-30
VIL1	-5.19223	2.01277	3.96e-32	4.15e-30
ME3	-3.45397	2.56561	5.35e-32	5.58e-30
GATA5	-6.00866	0.882141	5.72e-32	5.92e-30
F10	-3.10369	0.614276	7.54e-32	7.77e-30
KRT20	-7.13732	3.02345	7.93e-32	8.13e-30
CLCA1	-6.82126	-0.522099	8.74e-32	8.91e-30
TMEM238L	-5.50578	1.14078	1.57e-31	1.59e-29
CAPN8	-5.86016	3.53809	1.85e-31	1.86e-29
AGR3	-5.80992	1.90555	2.86e-31	2.87e-29
GAL3ST1	-4.36397	0.235068	3.16e-31	3.15e-29
CARNS1	-2.88053	1.69874	3.79e-31	3.76e-29
ORM2	-6.06752	-0.821211	3.99e-31	3.94e-29
C4BPB	-5.09949	0.120014	4.23e-31	4.15e-29
DUSP19	-2.72633	2.8727	5.58e-31	5.45e-29
AHCYL2	-2.23725	5.34041	6.98e-31	6.78e-29
HTR1E	-6.72716	-1.61894	7.13e-31	6.89e-29
ZNF69	-3.59521	1.20232	7.33e-31	7.05e-29
PIP5K1B	-4.1655	2.80065	8.59e-31	8.22e-29
CLRN3	-5.53007	-0.801521	4.08e-30	3.85e-28
HHLA2	-4.84452	0.613981	5.42e-30	5.08e-28
GNMT	-3.68196	0.268561	5.5e-30	5.13e-28
KCNA5	-5.06602	0.508586	7.3e-30	6.77e-28
ASXL3	-3.87703	0.351671	8.39e-30	7.71e-28
PPP1R36	-3.54032	0.169171	1.13e-29	1.04e-27
CELA3B	-6.5677	-1.17633	1.19e-29	1.08e-27
LIFR	-3.66941	5.51597	1.48e-29	1.34e-27
ADAM28	-3.64963	4.26256	1.58e-29	1.42e-27
LRRC2	-4.10127	-0.0299963	1.63e-29	1.46e-27
PDZD3	-3.92395	-1.21517	1.83e-29	1.62e-27
PGA4	-13.6752	5.37834	1.83e-29	1.62e-27
RAP1GAP	-3.37018	5.54583	2.01e-29	1.78e-27
ENAM	-5.04352	-0.275724	2.05e-29	1.8e-27
AVPR1B	-5.07071	-2.89785	2.28e-29	2e-27
FAM107B	-2.78138	5.67381	2.87e-29	2.5e-27
SLC3A1	-4.10009	-0.0119533	2.96e-29	2.56e-27
PM20D1	-3.88743	-0.243983	5.35e-29	4.62e-27
NR2F2	-2.50932	5.71176	6.39e-29	5.49e-27
FXYD4	-6.20033	0.140451	7.37e-29	6.31e-27
PPP1R14D	-4.55602	-0.64381	7.82e-29	6.66e-27
SCTR	-4.45297	0.165096	1.02e-28	8.67e-27
ADH4	-4.4692	-0.970804	1.03e-28	8.71e-27
PLIN1	-3.00152	-0.806743	1.11e-28	9.32e-27
GUCY2C	-3.80271	2.34678	1.12e-28	9.41e-27
OTC	-5.08393	-2.79656	1.54e-28	1.29e-26
UNC5CL	-3.48285	1.68688	1.79e-28	1.48e-26
AC011498.4	-4.40938	-1.37377	1.89e-28	1.56e-26
MUC17	-6.93343	4.20874	2.29e-28	1.89e-26
CCKAR	-7.72121	1.66907	2.97e-28	2.43e-26
MEP1A	-4.86773	-0.0826864	2.98e-28	2.43e-26
BTNL3	-5.61207	-0.899882	3.23e-28	2.62e-26
ANO7	-2.91082	1.89083	5.55e-28	4.49e-26
MUCL3	-7.6732	6.67633	5.8e-28	4.66e-26
TMEM82	-5.60902	-2.19507	1.17e-27	9.4e-26
GPD1	-3.65093	0.395051	1.6e-27	1.28e-25
CA1	-4.66074	-1.74144	2.35e-27	1.86e-25
FA2H	-3.84982	4.04208	2.56e-27	2.03e-25
ACACB	-3.08096	4.66738	2.68e-27	2.11e-25
RFLNA	-4.61206	3.38105	3.16e-27	2.48e-25
LEPR	-3.22358	4.91431	3.93e-27	3.07e-25
KCNJ3	-4.91617	0.0441185	4.49e-27	3.49e-25
VIP	-5.55325	1.57192	5.67e-27	4.39e-25
CIDEC	-4.81685	-1.50937	8.78e-27	6.77e-25
APLP1	-4.14191	3.95913	1.13e-26	8.7e-25
PLEKHA6	-3.59704	4.63125	1.23e-26	9.38e-25
NCMAP	-4.50435	1.08251	1.36e-26	1.04e-24
ADH6	-3.68867	0.98874	1.68e-26	1.28e-24
USH1C	-5.22993	2.35879	1.7e-26	1.28e-24
CKB	-3.5046	7.13308	1.89e-26	1.43e-24
VSTM2A	-5.08694	-2.2145	1.95e-26	1.46e-24
GSTM5	-3.16803	1.07995	3.49e-26	2.6e-24
CHAD	-4.18699	1.83486	3.51e-26	2.61e-24
ITLN1	-5.89304	1.03571	3.76e-26	2.78e-24
SGK2	-4.45872	2.45126	3.97e-26	2.93e-24
RORC	-4.53129	2.9128	4.34e-26	3.18e-24
SI	-6.89732	1.10194	4.34e-26	3.18e-24
ITGA8	-4.22893	4.66944	4.39e-26	3.21e-24
PLA2G1B	-4.74695	-2.10883	4.52e-26	3.28e-24
TMC5	-4.45925	4.31766	4.77e-26	3.45e-24
TPH1	-3.40786	0.290085	5.05e-26	3.64e-24
FABP1	-8.23349	1.73069	6.31e-26	4.53e-24
ALDH6A1	-2.25813	5.14083	9.54e-26	6.83e-24
ONECUT3	-4.73418	1.88695	9.69e-26	6.91e-24
MECOM	-2.95854	5.54209	1.09e-25	7.74e-24
MLPH	-4.039	4.66517	1.18e-25	8.36e-24
CADPS	-3.60191	0.175759	1.4e-25	9.85e-24
ETNPPL	-7.49857	2.08784	1.64e-25	1.15e-23
BCAS1	-4.56522	3.92206	2.07e-25	1.45e-23
TSPAN12	-3.08447	2.61009	2.36e-25	1.64e-23
ARRB1	-2.70213	3.86316	2.7e-25	1.87e-23
RAB17	-3.86117	2.6244	2.92e-25	2.02e-23
SLC18A2	-2.69659	0.0748309	5.86e-25	4.03e-23
SPINK4	-4.69227	-1.4237	6.38e-25	4.36e-23
ERN2	-5.20183	3.7828	6.95e-25	4.74e-23
ATP8A1	-3.56371	4.33682	7.22e-25	4.9e-23
SEMA4G	-2.83136	2.9436	8.11e-25	5.49e-23
TMPRSS2	-4.51112	5.39587	1.47e-24	9.92e-23
PTF1A	-5.53165	-3.37195	1.48e-24	9.92e-23
ARHGAP18	-2.25591	4.52207	1.84e-24	1.23e-22
NECTIN3	-3.33536	3.69492	1.89e-24	1.26e-22
SLC9A4	-5.60433	3.97806	1.91e-24	1.27e-22
APOA1	-4.43751	-0.106066	2.37e-24	1.57e-22
TFF1	-7.52711	6.14913	2.7e-24	1.78e-22
FAM47E	-3.15095	-0.0602778	3.01e-24	1.98e-22
KLF15	-4.04384	2.58502	3.06e-24	2.01e-22
ADIPOQ	-5.74352	-1.91584	3.21e-24	2.1e-22
UBL3	-2.20207	6.00802	3.4e-24	2.21e-22
SLC12A2	-2.59859	6.21527	3.61e-24	2.34e-22
SCG3	-4.4318	-0.943899	3.71e-24	2.4e-22
HRH2	-3.69641	2.01211	4.22e-24	2.72e-22
REP15	-3.04703	-1.13866	4.29e-24	2.76e-22
STS	-2.1377	3.92349	4.6e-24	2.94e-22
GLYCTK	-2.1764	1.59378	5.54e-24	3.54e-22
PRSS1	-6.69505	0.980393	5.97e-24	3.8e-22
PIGR	-6.13419	7.87923	6.57e-24	4.16e-22
CLDN23	-2.56843	2.65876	7.53e-24	4.74e-22
SLC9A3	-4.1725	5.11688	7.53e-24	4.74e-22
SYTL2	-3.03931	4.34637	7.59e-24	4.76e-22
ENTPD8	-4.26764	0.490924	8.04e-24	5.02e-22
GCNT1	-2.8874	3.87102	9.94e-24	6.19e-22
ODAM	-6.20219	2.19015	1.26e-23	7.8e-22
PDK4	-4.75095	6.22201	1.27e-23	7.83e-22
TMEM100	-3.83886	0.0939192	1.41e-23	8.67e-22
RCAN2	-3.3014	4.28159	1.51e-23	9.28e-22
CYP3A5	-3.74253	4.23157	1.63e-23	9.96e-22
GCKR	-3.75866	-0.132941	1.77e-23	1.07e-21
DCDC2	-4.30615	-0.172165	2.11e-23	1.28e-21
CLDN2	-4.23523	1.4052	2.49e-23	1.5e-21
ADGRD1	-3.94767	3.25232	2.5e-23	1.5e-21
REG3A	-9.21451	4.22347	3.09e-23	1.86e-21
SH3GL2	-5.14653	1.04907	3.34e-23	2e-21
GMDS	-2.28599	4.92105	3.39e-23	2.02e-21
JCHAIN	-4.1572	6.47772	4.8e-23	2.86e-21
ATP2A3	-2.58291	5.38865	4.98e-23	2.95e-21
CREB3L1	-3.26048	6.14831	5.1e-23	3.02e-21
SAMD13	-3.25857	0.0930701	6.96e-23	4.1e-21
GBGT1	-3.08489	2.86271	7.84e-23	4.59e-21
CTXND1	-5.09133	1.47383	8.15e-23	4.76e-21
VIPR2	-4.31147	0.565198	9.09e-23	5.29e-21
NEUROD1	-5.43252	-1.23298	9.74e-23	5.65e-21
PGA3	-11.8399	9.46604	1.15e-22	6.63e-21
ACSM1	-2.9692	-0.567945	1.28e-22	7.36e-21
SLC6A20	-4.03562	1.30732	1.35e-22	7.76e-21
KBTBD12	-4.29238	0.53637	1.35e-22	7.76e-21
MUC1	-3.29661	7.11254	1.43e-22	8.15e-21
CELA3A	-6.86549	-1.00387	1.44e-22	8.22e-21
SNTB1	-2.70665	4.28011	1.96e-22	1.11e-20
SCGN	-5.44616	-1.99932	2.49e-22	1.41e-20
CLMN	-2.52671	4.47835	2.65e-22	1.49e-20
RNASE4	-2.82017	0.293833	2.85e-22	1.6e-20
CACNA2D2	-2.87658	1.67592	3.23e-22	1.81e-20
SCUBE2	-3.36352	3.22871	3.44e-22	1.92e-20
SERPINA1	-3.4445	5.78591	3.79e-22	2.11e-20
SYT13	-4.49014	2.91674	3.91e-22	2.17e-20
ADRA2A	-3.97554	3.21722	4.32e-22	2.38e-20
KIAA1958	-2.13511	4.25824	5.63e-22	3.09e-20
FAM177B	-3.14978	1.44939	6.57e-22	3.59e-20
TDGF1	-4.25268	-1.45784	7.54e-22	4.11e-20
FAM174B	-2.62142	3.46632	8.67e-22	4.71e-20
PTPRJ	-2.22862	4.75646	9.28e-22	5.03e-20
NSG2	-4.32301	-1.45143	1.06e-21	5.73e-20
GATA4	-4.93327	4.00552	1.38e-21	7.46e-20
REG4	-6.74688	4.36146	2.13e-21	1.14e-19
MT-ND6	-2.43174	9.45212	2.22e-21	1.18e-19
TTR	-5.89143	-0.526448	2.32e-21	1.23e-19
TMEM151A	-4.01857	0.45255	2.37e-21	1.26e-19
SLC17A4	-5.81382	-1.90804	2.5e-21	1.32e-19
A4GNT	-4.32657	-0.52112	2.92e-21	1.54e-19
FZD4	-2.32461	4.06413	3.02e-21	1.59e-19
PLEKHB1	-3.16076	2.2125	3.68e-21	1.93e-19
FMOD	-2.88655	6.17189	4.55e-21	2.37e-19
ARSD	-2.08857	5.36805	5.02e-21	2.6e-19
RIMS4	-4.69487	0.903544	5.65e-21	2.92e-19
MTURN	-2.41919	4.99054	5.87e-21	3.02e-19
ADCY6	-2.11197	4.6514	6.11e-21	3.14e-19
INSRR	-3.40689	-1.42326	7.71e-21	3.95e-19
TFR2	-3.15333	2.95532	7.73e-21	3.95e-19
OSBPL7	-2.43925	3.72039	1.13e-20	5.71e-19
GALNTL6	-3.86324	-1.44485	1.18e-20	5.97e-19
ALB	-4.30624	-0.321226	1.27e-20	6.39e-19
ATOH1	-5.78155	-2.54928	1.37e-20	6.88e-19
SV2C	-3.15578	-0.299128	1.4e-20	7.02e-19
COL2A1	-4.84001	3.64158	2.2e-20	1.1e-18
RBM47	-2.09401	6.9018	2.32e-20	1.16e-18
TENT5C	-3.10218	4.02877	2.42e-20	1.2e-18
KLHL41	-3.49557	-0.813133	2.46e-20	1.22e-18
SLC16A7	-3.07336	4.95829	3.37e-20	1.67e-18
TRIM74	-2.99194	-1.30208	3.41e-20	1.68e-18
ARFGEF3	-3.31733	5.19501	3.41e-20	1.68e-18
NEUROG3	-4.62078	-3.39066	3.82e-20	1.88e-18
LCN10	-4.19868	-1.60049	4.67e-20	2.29e-18
MS4A8	-5.53783	-0.351074	4.9e-20	2.39e-18
ADH1A	-3.84469	-1.4641	5.36e-20	2.61e-18
TREH	-3.38832	-0.717131	5.61e-20	2.73e-18
FNDC5	-3.57953	1.84905	6.79e-20	3.29e-18
ZNF385B	-4.05974	2.08763	8.49e-20	4.1e-18
BCL2L14	-3.46616	1.57494	8.66e-20	4.17e-18
MT-ND5	-2.21083	11.3684	9e-20	4.33e-18
LYZ	-3.46045	7.03175	9.59e-20	4.6e-18
ATP8B1	-2.17148	6.834	9.71e-20	4.64e-18
ITIH3	-3.33215	-0.201316	1.1e-19	5.24e-18
PAQR8	-2.91863	4.50488	1.16e-19	5.54e-18
ITIH5	-3.1621	4.52788	1.19e-19	5.66e-18
CRACR2B	-3.00036	3.01017	1.29e-19	6.12e-18
C2CD4B	-3.44458	1.92062	1.41e-19	6.64e-18
HNF4G	-3.63659	2.29279	1.55e-19	7.32e-18
RAB3C	-3.84293	0.411634	1.64e-19	7.71e-18
EPHA5	-4.31745	-0.662547	1.66e-19	7.78e-18
SELENBP1	-3.3597	4.70184	2.11e-19	9.85e-18
PGPEP1	-2.12271	4.07503	3.55e-19	1.65e-17
ANG	-2.5824	1.78872	3.73e-19	1.73e-17
RNF186	-5.15448	-2.23946	3.89e-19	1.8e-17
DPEP1	-3.37164	-0.643036	3.9e-19	1.8e-17
NTN4	-2.46272	4.48816	4.48e-19	2.06e-17
AATK	-2.33326	2.69403	5.02e-19	2.3e-17
RALGAPA2	-2.034	5.80105	6.04e-19	2.76e-17
FUT4	-2.10842	3.10536	6.49e-19	2.96e-17
ANKRD40CL	-4.16036	-1.64251	7.27e-19	3.31e-17
CAPN5	-2.88706	5.22206	7.29e-19	3.31e-17
AC026464.1	-4.76172	-4.28268	7.78e-19	3.51e-17
SHROOM3	-2.82513	6.2527	1.09e-18	4.9e-17
ATP7B	-2.37757	3.0138	1.22e-18	5.49e-17
RGMB	-2.06232	4.59063	1.27e-18	5.7e-17
KIT	-2.98038	3.77439	1.28e-18	5.75e-17
ARSE	-3.14081	0.744281	1.46e-18	6.5e-17
HPN	-5.04741	2.52143	1.54e-18	6.87e-17
PIK3C2G	-4.0682	3.56168	2.69e-18	1.19e-16
TCEAL6	-4.08736	-2.9196	3.25e-18	1.42e-16
FAM107A	-3.69765	3.21395	3.26e-18	1.43e-16
GOLM1	-2.4308	6.57831	3.79e-18	1.65e-16
RFX6	-4.6753	-1.41484	3.97e-18	1.73e-16
MBOAT4	-2.53062	-1.54698	3.99e-18	1.74e-16
LPIN2	-2.16097	5.2619	4.11e-18	1.78e-16
PLA2G10	-3.26971	-0.0280351	4.36e-18	1.89e-16
CAB39L	-2.36482	3.76746	5.13e-18	2.21e-16
SMIM32	-4.09778	-1.4894	5.51e-18	2.37e-16
METTL7A	-2.85178	5.82063	6.26e-18	2.69e-16
FAM189A2	-3.38403	2.25852	6.5e-18	2.79e-16
APOH	-4.88772	-1.44599	6.8e-18	2.91e-16
GREM2	-3.66792	2.64153	7.9e-18	3.38e-16
KCNJ16	-5.63098	3.27283	8.29e-18	3.53e-16
PIRT	-4.34772	-1.8193	8.54e-18	3.63e-16
CFAP221	-3.94943	-0.457007	9.88e-18	4.19e-16
AQP2	-4.65653	-3.01147	1.11e-17	4.72e-16
FAM19A2	-2.70919	0.408829	1.18e-17	4.97e-16
PXMP2	-2.0895	3.34501	1.18e-17	4.97e-16
RGL3	-3.63385	1.93291	1.25e-17	5.25e-16
XK	-2.97818	3.1987	1.36e-17	5.71e-16
SRRM4	-3.52666	-2.12548	1.41e-17	5.9e-16
ADCYAP1R1	-3.7335	0.56471	1.44e-17	5.99e-16
MUSK	-2.88917	-0.320279	1.52e-17	6.31e-16
NAT2	-4.88887	-1.53301	1.53e-17	6.34e-16
VAT1L	-2.64699	0.484867	1.59e-17	6.6e-16
CFTR	-4.0259	2.01468	1.66e-17	6.88e-16
CALY	-3.6659	-2.37199	1.67e-17	6.91e-16
SORBS2	-3.16585	4.48519	1.78e-17	7.32e-16
PDE1B	-2.68183	1.62372	1.89e-17	7.75e-16
C6orf201	-2.39946	-1.60481	1.89e-17	7.75e-16
COQ8A	-2.01625	5.36391	1.9e-17	7.79e-16
TRIM36	-2.62063	1.72203	1.94e-17	7.91e-16
TMEM220	-2.23994	2.07156	2.2e-17	8.97e-16
ZBED3	-2.15279	3.87004	2.23e-17	9.06e-16
MUC6	-6.49666	8.31598	2.38e-17	9.64e-16
KALRN	-2.30686	4.23138	2.7e-17	1.09e-15
FABP2	-4.4141	-2.46782	2.99e-17	1.2e-15
CCDC110	-2.93197	0.456296	3.05e-17	1.23e-15
C6	-5.29341	0.0572185	3.28e-17	1.32e-15
DSCAML1	-2.95414	-0.673708	3.44e-17	1.38e-15
PRAP1	-4.00114	0.897724	3.51e-17	1.4e-15
DDAH1	-2.5779	4.92679	3.67e-17	1.46e-15
SLC44A3	-2.58401	3.06729	3.69e-17	1.46e-15
GMPR	-2.88477	2.24205	4.06e-17	1.61e-15
MYORG	-2.15978	5.3928	4.18e-17	1.65e-15
LAMA2	-2.62727	4.78145	4.36e-17	1.72e-15
CHRNA7	-3.18802	0.378014	4.42e-17	1.74e-15
ABCG8	-4.44968	-1.54881	5.42e-17	2.13e-15
CLCNKB	-3.38557	-1.32349	5.55e-17	2.18e-15
SP5	-3.74568	0.561643	5.64e-17	2.21e-15
RETREG1	-2.59739	3.58137	5.94e-17	2.32e-15
KBTBD11	-2.62274	2.04576	6.23e-17	2.43e-15
RBPJL	-3.84791	-1.28099	6.59e-17	2.56e-15
GALNT12	-2.29897	4.13161	6.95e-17	2.7e-15
DPT	-3.57729	4.02014	8.33e-17	3.22e-15
TRNP1	-2.69656	4.79525	8.4e-17	3.24e-15
SLC25A4	-2.1033	4.88295	8.54e-17	3.29e-15
DNALI1	-2.90569	1.52007	9.23e-17	3.55e-15
CNTN3	-3.86356	0.276907	9.66e-17	3.7e-15
HPGD	-3.49549	5.04815	1e-16	3.83e-15
WIPF3	-2.81833	3.26943	1.01e-16	3.86e-15
CHDH	-2.9816	2.93951	1.04e-16	3.95e-15
GOLT1A	-4.03902	-0.329799	1.05e-16	4.01e-15
PLLP	-2.3998	4.57661	1.25e-16	4.72e-15
ARHGAP44	-2.33369	2.73643	1.3e-16	4.92e-15
KIF19	-3.39586	0.48647	1.4e-16	5.26e-15
ANPEP	-3.46328	5.70205	1.53e-16	5.74e-15
SLC16A10	-2.62854	2.65792	1.56e-16	5.84e-15
AZGP1	-4.83806	4.51684	1.58e-16	5.93e-15
PKIB	-3.01107	2.30398	1.6e-16	5.97e-15
SLC26A9	-4.17118	4.74613	1.65e-16	6.15e-15
RHPN2	-2.48947	4.00194	1.87e-16	6.97e-15
ROR1	-2.77134	3.41531	1.97e-16	7.32e-15
RAI2	-2.53211	3.08396	2.08e-16	7.69e-15
MAGIX	-2.19459	1.70784	2.1e-16	7.77e-15
IFI16	2.19393	8.01163	2.14e-16	7.88e-15
ENPP4	-2.88489	3.73188	2.16e-16	7.95e-15
FGA	-6.40758	2.71875	2.56e-16	9.39e-15
GSTA2	-5.06633	-0.265069	2.71e-16	9.91e-15
TMEM211	-4.22168	-1.46266	2.72e-16	9.93e-15
CREB3L3	-3.66624	-2.09596	2.99e-16	1.09e-14
MYMX	-3.52176	-1.67743	3.05e-16	1.11e-14
GUCA1C	-5.72363	-1.39211	3.34e-16	1.21e-14
SULT1C3	-4.86614	-3.70491	3.35e-16	1.21e-14
LRIG1	-2.2349	6.46242	3.37e-16	1.22e-14
ST6GALNAC1	-3.46172	4.33361	3.77e-16	1.36e-14
BIRC5	2.8571	5.49041	3.94e-16	1.42e-14
FOXA2	-4.21741	2.18117	4e-16	1.44e-14
DMBT1	-5.45866	6.08308	4.09e-16	1.46e-14
SNAI3	-2.15254	0.198038	4.09e-16	1.46e-14
PIWIL4	-2.17129	1.26793	4.42e-16	1.58e-14
DUSP4	-2.7849	4.97317	5.06e-16	1.8e-14
PSAPL1	-4.92532	2.81768	5.07e-16	1.8e-14
TRIP13	2.99876	5.31789	5.37e-16	1.91e-14
NFATC2	-2.29597	4.28576	5.48e-16	1.94e-14
SYNE1	-2.49899	5.35906	5.85e-16	2.07e-14
HPR	-2.66087	-2.9573	5.92e-16	2.09e-14
NRM	2.10567	5.05196	6e-16	2.11e-14
SRL	-2.80171	-0.128434	7.06e-16	2.48e-14
MMP11	6.00383	7.25851	7.26e-16	2.54e-14
GLYATL1	-3.39566	-1.04017	7.81e-16	2.73e-14
PKHD1L1	-3.47476	-0.131261	8.18e-16	2.86e-14
PLAU	3.89894	7.47982	8.22e-16	2.86e-14
AMBP	-3.64046	-1.43276	8.22e-16	2.86e-14
KCNH7	-3.09963	-2.5683	8.45e-16	2.93e-14
LCN6	-3.65227	-2.02447	8.58e-16	2.97e-14
PTPRB	-2.10245	4.25824	9.92e-16	3.43e-14
RAB37	-2.33885	0.329708	1.01e-15	3.48e-14
VEGFD	-2.98337	0.344457	1.14e-15	3.92e-14
CYFIP2	-2.79226	4.90611	1.26e-15	4.33e-14
SERPIND1	-2.51563	-1.02914	1.34e-15	4.59e-14
C2orf40	-4.45571	2.43867	1.52e-15	5.16e-14
KCNK2	-3.7856	1.36568	1.64e-15	5.56e-14
KCNH6	-3.49058	-2.23634	1.67e-15	5.68e-14
FABP3	-2.47668	2.02873	1.75e-15	5.92e-14
SEC14L5	-2.13331	0.698702	1.87e-15	6.32e-14
NME5	-3.13521	-1.32372	2e-15	6.73e-14
TOX3	-4.57217	2.52358	2.17e-15	7.27e-14
KIAA0895	-2.00466	3.79911	2.21e-15	7.4e-14
TRIM73	-2.25704	-0.657777	2.27e-15	7.56e-14
CKS1B	2.08356	5.14852	2.32e-15	7.7e-14
GPR17	-2.99414	-0.153721	2.32e-15	7.7e-14
ARHGAP6	-2.55466	1.89164	2.35e-15	7.79e-14
ZC3H12B	-2.36783	1.20137	2.81e-15	9.3e-14
SYT4	-4.99255	-1.73723	2.96e-15	9.77e-14
C3orf18	-2.28423	1.562	3.2e-15	1.06e-13
CDCA4	2.27077	5.53444	3.32e-15	1.09e-13
ZNF540	-2.53751	-0.0149978	3.39e-15	1.11e-13
TMEM132C	-3.5764	-0.690599	3.96e-15	1.3e-13
AXIN2	-2.21716	2.98297	4.81e-15	1.57e-13
KCNK16	-4.51987	-4.35577	4.9e-15	1.59e-13
ORM1	-4.77883	-1.77729	5.44e-15	1.76e-13
CHKA	-2.01942	4.0892	5.55e-15	1.8e-13
SYNPR	-3.7352	-2.3015	5.69e-15	1.84e-13
C1QTNF7	-3.12812	0.715814	5.88e-15	1.89e-13
C15orf65	-2.13111	-0.0765015	6.67e-15	2.14e-13
SLC19A3	-3.16948	0.523911	6.73e-15	2.16e-13
GLOD5	-3.45824	-2.67537	6.86e-15	2.2e-13
WNK4	-3.35863	2.56857	6.89e-15	2.2e-13
C17orf53	2.54597	3.62349	7.09e-15	2.26e-13
UBE2S	2.31843	5.79913	7.8e-15	2.49e-13
ANXA10	-4.67064	5.12304	8.15e-15	2.6e-13
CNDP1	-2.94266	-1.86456	8.22e-15	2.61e-13
DNAJC22	-3.1105	2.03965	8.67e-15	2.75e-13
CCL15	-3.89502	-3.22234	8.95e-15	2.83e-13
SYBU	-3.08732	3.55545	9.13e-15	2.88e-13
RGS7	-4.06683	-1.96931	9.61e-15	3.03e-13
GATM	-2.68425	5.1097	1.02e-14	3.2e-13
KCNJ10	-2.75291	-0.445484	1.02e-14	3.21e-13
NUDT1	2.25252	4.1106	1.04e-14	3.26e-13
DNER	-3.85013	3.4238	1.12e-14	3.5e-13
GABRG1	-4.90774	-3.11898	1.14e-14	3.58e-13
EME1	2.41108	2.55288	1.25e-14	3.9e-13
SLC26A3	-3.77023	-1.22496	1.26e-14	3.92e-13
F2RL3	-2.12383	2.16041	1.27e-14	3.94e-13
KIF23	2.30873	5.35718	1.35e-14	4.2e-13
TMEM125	-2.70928	2.54928	1.36e-14	4.22e-13
KIF20A	2.66981	5.41624	1.43e-14	4.41e-13
WDHD1	2.22192	4.86245	1.5e-14	4.63e-13
KCNK5	-2.57187	3.0754	1.52e-14	4.68e-13
PAIP2B	-2.28845	3.66648	1.61e-14	4.96e-13
XPNPEP2	-3.78097	1.2541	1.71e-14	5.25e-13
KLHL32	-2.70427	-1.59071	1.92e-14	5.87e-13
MUC3A	-3.57682	3.35367	1.96e-14	5.99e-13
GPT2	-2.17217	6.27926	1.98e-14	6.05e-13
TNXB	-3.78087	5.95768	2.16e-14	6.59e-13
ACSM5	-3.13822	-1.53073	2.17e-14	6.6e-13
TRPM3	-3.32211	-0.628629	2.31e-14	7.01e-13
SLC1A1	-2.58397	2.90703	2.32e-14	7.02e-13
HEPACAM2	-4.01445	-0.130373	2.35e-14	7.11e-13
HSPB6	-3.57499	5.08836	2.63e-14	7.93e-13
CHRM2	-3.70229	0.184575	2.65e-14	7.96e-13
GPR160	-2.44183	3.70356	2.75e-14	8.25e-13
PDE4C	-2.94739	1.24137	2.78e-14	8.33e-13
ZBTB16	-3.96633	3.62091	2.98e-14	8.92e-13
PTPRH	-3.15484	3.66314	2.99e-14	8.95e-13
FRMD3	-2.38861	1.41739	3.05e-14	9.09e-13
GALNT4	-2.0379	0.186378	3.1e-14	9.24e-13
SMIM31	-4.24712	-0.497847	3.14e-14	9.33e-13
ABCA8	-3.51284	2.99103	3.2e-14	9.5e-13
RECQL4	2.1778	5.32063	3.22e-14	9.55e-13
TMEM171	-2.64869	2.90525	3.32e-14	9.83e-13
STMN2	-3.73807	-0.481726	3.44e-14	1.02e-12
PDX1	-3.70271	-0.142603	3.56e-14	1.05e-12
TDO2	3.79143	2.11769	3.59e-14	1.06e-12
ABCG5	-3.09594	-1.03348	4.02e-14	1.18e-12
SLC18A1	-2.93595	-2.61871	4.29e-14	1.26e-12
ABCC6	-2.2207	2.03899	4.45e-14	1.3e-12
MASP1	-3.14678	1.63685	4.65e-14	1.36e-12
ORC6	2.28114	3.72454	4.77e-14	1.39e-12
FAM180B	-3.53643	-3.1131	4.81e-14	1.4e-12
UNC5A	-3.06877	0.530311	5.06e-14	1.47e-12
SYP	-2.10412	0.677069	5.29e-14	1.53e-12
MYL4	-2.50826	-2.61579	5.38e-14	1.56e-12
FAIM2	-3.05035	0.971582	5.57e-14	1.61e-12
GPRC5B	-2.27323	4.22726	5.64e-14	1.63e-12
CGN	-2.30471	4.67412	5.68e-14	1.64e-12
SH3BGRL2	-2.90011	5.51637	5.7e-14	1.64e-12
ATOH8	-2.87623	1.62113	5.83e-14	1.67e-12
LIPH	-2.82495	4.57922	5.93e-14	1.7e-12
ICA1	-2.80027	3.28707	6.38e-14	1.83e-12
PPARG	-2.72348	2.87126	6.41e-14	1.83e-12
GPRIN3	-2.02865	3.61863	6.44e-14	1.83e-12
TK1	2.63642	6.61117	7.63e-14	2.17e-12
HNMT	-2.09699	3.35908	7.75e-14	2.2e-12
MFAP2	3.5856	4.96082	8.65e-14	2.45e-12
KCNJ11	-3.17702	1.39611	8.66e-14	2.45e-12
KIF18A	2.54657	4.11524	8.66e-14	2.45e-12
ABCC12	-4.10446	-2.79155	9.1e-14	2.56e-12
FAM149A	-2.66701	2.24593	9.43e-14	2.64e-12
RGS5	-2.3324	6.82669	9.55e-14	2.67e-12
FRMD1	-5.17495	2.62327	9.66e-14	2.7e-12
PPP1R9A	-3.4022	2.55488	1.02e-13	2.83e-12
FAM110D	-2.36487	0.458393	1.03e-13	2.86e-12
KAZALD1	-2.09601	2.03074	1.07e-13	2.98e-12
MMEL1	-2.68638	-0.829198	1.08e-13	2.98e-12
NUF2	2.64652	4.24594	1.13e-13	3.13e-12
ABCC8	-4.54576	0.389778	1.14e-13	3.14e-12
KIF2C	2.27254	5.3069	1.18e-13	3.26e-12
CLEC3B	-3.04904	1.6142	1.21e-13	3.34e-12
RANBP3L	-3.56798	0.550876	1.24e-13	3.42e-12
PARD3B	-2.2476	3.5755	1.29e-13	3.53e-12
PRKN	-2.27837	1.30171	1.29e-13	3.54e-12
ASPA	-3.17208	0.69217	1.3e-13	3.55e-12
VWA7	-2.04954	2.03689	1.37e-13	3.75e-12
SLC40A1	-2.39526	6.21259	1.38e-13	3.77e-12
ERBB4	-3.89687	0.119602	1.45e-13	3.95e-12
HGD	-4.23433	2.03119	1.55e-13	4.21e-12
P2RX2	-3.1853	-1.78757	1.58e-13	4.29e-12
UBE2T	2.33125	4.38087	1.6e-13	4.34e-12
TPX2	2.47497	6.90224	1.63e-13	4.41e-12
RFC4	2.23905	4.98883	1.67e-13	4.51e-12
PLAC9	-2.45649	1.48045	1.7e-13	4.58e-12
AURKB	2.72344	4.77948	1.87e-13	5.02e-12
KIF13B	-2.02118	5.76752	2.17e-13	5.83e-12
MT1F	-2.49271	3.70943	2.62e-13	7.01e-12
NR3C2	-2.9739	2.78413	2.68e-13	7.15e-12
PIFO	-2.86801	0.582645	2.87e-13	7.65e-12
CCDC154	-2.54327	-0.400386	3.01e-13	8e-12
MT1H	-3.47321	1.72896	3.06e-13	8.13e-12
FAM221A	-2.33898	2.65393	3.14e-13	8.32e-12
PROK1	-3.33464	-3.5963	3.17e-13	8.38e-12
CCNB1	2.26185	5.89489	3.28e-13	8.64e-12
ADAM33	-2.48926	2.49664	3.4e-13	8.95e-12
CFD	-2.69632	4.86833	3.66e-13	9.6e-12
MGAT4A	-2.00811	4.18539	3.89e-13	1.02e-11
CFAP99	-2.3211	-2.68555	4.13e-13	1.08e-11
GDF9	-2.19343	-0.333811	4.14e-13	1.08e-11
EPB41L4B	-2.04093	4.99531	4.41e-13	1.15e-11
KRTAP4-1	6.33908	-0.396644	4.99e-13	1.29e-11
MYOC	-5.14354	3.75478	5.23e-13	1.35e-11
B3GNT7	-2.35436	4.20852	5.91e-13	1.53e-11
WFDC1	-2.43218	2.68082	5.95e-13	1.54e-11
MISP3	-2.259	2.68313	6.45e-13	1.66e-11
PKMYT1	2.69227	5.36922	6.57e-13	1.69e-11
FZD6	2.10334	7.35881	6.57e-13	1.69e-11
LONRF3	-2.66169	1.38841	6.66e-13	1.71e-11
KIF14	2.54647	4.70798	6.68e-13	1.71e-11
AR	-2.55039	1.91883	6.68e-13	1.71e-11
AOX1	-3.13066	2.83388	6.87e-13	1.76e-11
VWA5B1	-3.47476	-2.23246	7.47e-13	1.91e-11
CYP3A4	-2.99736	-1.99538	7.69e-13	1.96e-11
RERGL	-2.92387	-1.00963	7.8e-13	1.98e-11
HOXD9	3.07956	2.59605	7.91e-13	2.01e-11
AL163636.2	-3.13911	-4.19836	8.04e-13	2.04e-11
RGS11	-2.57105	1.37115	8.63e-13	2.19e-11
ALDH3B1	-2.24119	3.97521	8.93e-13	2.26e-11
TROAP	2.37275	4.85125	8.98e-13	2.26e-11
AMER3	-3.41118	-2.36217	9.81e-13	2.47e-11
GPHA2	-3.43166	-2.99744	1.04e-12	2.61e-11
ADAM12	4.55061	5.67833	1.08e-12	2.71e-11
GLP1R	-3.23342	-2.16015	1.09e-12	2.72e-11
NMRK2	-3.66606	-2.96756	1.31e-12	3.27e-11
CDC45	2.61756	4.26893	1.38e-12	3.41e-11
RASEF	-2.41759	4.66209	1.4e-12	3.45e-11
PTGFR	-2.97092	1.458	1.43e-12	3.52e-11
CDH24	2.15316	4.47977	1.47e-12	3.63e-11
DDI1	-3.59323	-3.34587	1.52e-12	3.75e-11
AGR2	-3.71209	7.1266	1.53e-12	3.77e-11
MT1M	-3.28399	2.36547	1.54e-12	3.78e-11
GCNT3	-3.25963	4.00606	1.55e-12	3.8e-11
SMPDL3B	-2.96229	2.47563	1.59e-12	3.9e-11
SLC5A9	-2.87447	-0.440107	1.66e-12	4.05e-11
ANO5	-3.19018	2.10307	1.82e-12	4.44e-11
CDC20	2.48837	5.9747	1.83e-12	4.46e-11
HMGB3	2.34728	6.05481	1.84e-12	4.47e-11
MTRNR2L1	-2.22532	0.949959	1.91e-12	4.63e-11
RPL39L	3.00814	3.97386	1.91e-12	4.63e-11
RSPO2	-3.63539	0.715196	1.92e-12	4.63e-11
GNGT1	3.92939	2.4975	1.95e-12	4.7e-11
SCARA5	-3.7286	3.44505	2.02e-12	4.87e-11
TEDC2	2.47451	2.88933	2.04e-12	4.9e-11
ACADL	-3.5917	0.251387	2.08e-12	4.99e-11
OGN	-3.16322	3.71316	2.09e-12	5.03e-11
LAMP3	3.7292	5.67498	2.11e-12	5.05e-11
CAPZA3	-3.41322	-3.00705	2.13e-12	5.11e-11
TJP3	-3.00931	4.24762	2.2e-12	5.25e-11
CABP1	-2.22119	-0.234958	2.21e-12	5.27e-11
PRLHR	-3.34628	-3.77144	2.24e-12	5.35e-11
CYP2B6	-4.13643	-0.905057	2.27e-12	5.4e-11
CENPA	2.59423	3.62452	2.45e-12	5.81e-11
CDKN3	2.51734	4.03825	2.52e-12	5.97e-11
KIAA1324	-3.49749	6.34378	2.61e-12	6.16e-11
CDK1	2.0985	5.7972	2.66e-12	6.29e-11
E2F7	2.85208	4.59916	2.91e-12	6.84e-11
KIF18B	2.33552	5.32736	2.92e-12	6.86e-11
DLGAP5	2.46405	5.05007	3.12e-12	7.31e-11
SGSM1	-2.67976	1.38246	3.27e-12	7.65e-11
SNAI2	2.72955	6.20118	3.3e-12	7.7e-11
RSPH1	-2.49034	-0.622232	3.31e-12	7.72e-11
MFSD6L	-2.93154	-0.199942	3.57e-12	8.33e-11
FRMD5	-2.33193	1.18826	3.6e-12	8.38e-11
TRARG1	-3.26944	-3.05794	3.79e-12	8.79e-11
LIPJ	-2.91804	-2.28785	4.02e-12	9.27e-11
C10orf55	3.46973	1.4839	4.21e-12	9.67e-11
C20orf85	-4.15589	-4.10183	4.39e-12	1e-10
CDHR3	-2.52546	2.18714	4.59e-12	1.05e-10
CDH2	-2.93819	3.37249	5.01e-12	1.14e-10
SNAPC1	2.01858	4.05916	5.14e-12	1.17e-10
FBP1	-2.6677	3.82045	5.36e-12	1.22e-10
C1orf210	-2.11266	2.8204	5.57e-12	1.26e-10
TYMP	3.19508	8.11654	5.67e-12	1.28e-10
TMEM72	-3.42843	-2.50434	6.11e-12	1.37e-10
CHRFAM7A	-2.45916	-1.38808	6.17e-12	1.39e-10
COL10A1	6.39346	5.53928	6.9e-12	1.55e-10
DEPDC1	2.37808	4.79247	7.06e-12	1.58e-10
INPP5J	-2.14651	2.58652	7.15e-12	1.6e-10
LY6E	2.53417	8.37335	7.18e-12	1.61e-10
COL14A1	-2.5493	5.47072	7.3e-12	1.63e-10
ANXA13	-2.79218	-0.608875	7.95e-12	1.77e-10
NEK2	2.37379	4.33245	8.14e-12	1.81e-10
RNASEH2A	2.02352	4.73717	8.3e-12	1.85e-10
APOBEC1	-4.21351	-2.32176	8.62e-12	1.91e-10
STMN1	2.22304	7.37211	8.79e-12	1.95e-10
CGB7	3.01028	0.677677	8.97e-12	1.98e-10
KCNK3	-2.74657	1.64048	9.52e-12	2.09e-10
CSRP3	-3.1549	-3.69433	9.6e-12	2.11e-10
CFAP46	-3.46824	1.18147	9.92e-12	2.18e-10
NCAPH	2.34726	4.67279	1.01e-11	2.22e-10
OMP	-2.85431	-3.58942	1.03e-11	2.25e-10
FSCN1	3.07469	9.63559	1.04e-11	2.28e-10
GABRA3	4.59557	2.66274	1.12e-11	2.44e-10
SEMA3B	-2.45484	4.34583	1.13e-11	2.46e-10
RASSF6	-2.66083	4.71444	1.16e-11	2.52e-10
CDC6	2.32296	4.99323	1.18e-11	2.55e-10
MCM10	2.54074	4.0478	1.21e-11	2.61e-10
TAC3	-2.96562	-2.71054	1.22e-11	2.64e-10
CUX2	-3.86615	1.35474	1.22e-11	2.64e-10
SLC9A2	-3.15905	4.14649	1.26e-11	2.71e-10
WDR72	3.26353	5.74153	1.29e-11	2.78e-10
UGT2A3	-4.57965	-1.73188	1.29e-11	2.78e-10
ADAMTS8	-3.27347	2.34921	1.32e-11	2.84e-10
OLFM4	-4.65443	5.73757	1.36e-11	2.92e-10
UBE2C	2.44596	5.76357	1.38e-11	2.95e-10
TM4SF4	-4.34939	0.0810271	1.38e-11	2.95e-10
CDCA5	2.44999	4.92164	1.4e-11	2.98e-10
SLAIN1	-2.61337	1.64527	1.4e-11	2.98e-10
CKAP2L	2.48161	4.67999	1.45e-11	3.09e-10
EXO1	2.46913	4.22524	1.54e-11	3.28e-10
NUSAP1	2.16282	5.93501	1.55e-11	3.28e-10
RAD54L	2.21348	3.51734	1.59e-11	3.36e-10
SLC13A2	-3.25844	-1.34788	1.59e-11	3.38e-10
MSLN	-3.97354	5.08011	1.7e-11	3.6e-10
KIF4A	2.27491	4.97759	1.77e-11	3.73e-10
TMEM56	-2.40892	3.42547	1.79e-11	3.76e-10
DEPDC1B	2.15741	3.91698	1.81e-11	3.8e-10
MAD2L1	2.11345	5.18215	1.83e-11	3.84e-10
ARX	-3.48713	-1.73738	1.84e-11	3.86e-10
NDST3	-3.12305	-0.947699	1.88e-11	3.93e-10
ULBP2	3.89091	3.59684	1.92e-11	4.02e-10
KLF9	-2.08795	6.02305	1.95e-11	4.06e-10
DTL	2.30165	5.17055	2.04e-11	4.25e-10
NTF4	2.90894	1.48709	2.05e-11	4.27e-10
SYPL2	-2.33585	-0.0129626	2.11e-11	4.39e-10
CBX2	3.33479	5.10057	2.18e-11	4.52e-10
CD300LG	-3.31277	-1.49449	2.18e-11	4.52e-10
ENPP1	-2.27072	2.88214	2.22e-11	4.58e-10
SLC1A7	-2.59891	-0.71088	2.92e-11	5.98e-10
GCNT4	-2.28807	2.95802	2.92e-11	5.99e-10
PROM1	-3.72081	4.02651	3.17e-11	6.47e-10
GALR1	-3.30757	-2.26372	3.19e-11	6.5e-10
CCBE1	-2.71707	1.78967	3.2e-11	6.52e-10
GINS1	2.13584	4.642	3.28e-11	6.67e-10
DNMT3B	2.47504	3.90521	3.31e-11	6.72e-10
CPED1	-2.51795	3.5624	3.34e-11	6.77e-10
TNFRSF11A	-2.08379	3.1053	3.34e-11	6.77e-10
PDE2A	-2.14762	2.94993	3.43e-11	6.93e-10
TTLL6	-3.45614	-1.14545	3.45e-11	6.97e-10
PRRG3	-2.50785	2.18844	3.56e-11	7.18e-10
B3GNT3	-2.647	4.64365	3.63e-11	7.31e-10
SMIM11A	-2.4781	-3.65321	3.74e-11	7.51e-10
TNFRSF18	3.89917	3.66753	4.07e-11	8.13e-10
ACSM6	-2.78227	-2.05729	4.13e-11	8.25e-10
GRAMD1B	-2.94858	3.54844	4.2e-11	8.37e-10
MADCAM1	-2.07974	-0.33922	4.22e-11	8.42e-10
PROCA1	-2.20569	1.51814	4.23e-11	8.42e-10
CGNL1	-2.71762	4.57554	4.34e-11	8.62e-10
CMA1	-3.14069	-1.34126	4.47e-11	8.88e-10
PACSIN1	-2.7131	0.538439	4.51e-11	8.93e-10
ECT2	2.15909	6.78702	4.51e-11	8.93e-10
C4orf19	-2.75788	2.00389	4.51e-11	8.93e-10
MAP1LC3C	-2.86044	-2.33451	4.66e-11	9.21e-10
CENPE	2.09451	5.19587	4.74e-11	9.35e-10
PTCHD1	-3.02116	1.39179	4.8e-11	9.47e-10
ANLN	2.51768	6.88631	5.34e-11	1.05e-09
HSPB9	-2.14356	-1.35235	5.4e-11	1.06e-09
ABI3BP	-2.99172	5.03829	5.48e-11	1.07e-09
NPR1	-2.24914	2.57136	5.49e-11	1.07e-09
SPP1	5.98826	8.32701	5.81e-11	1.14e-09
AFM	-4.67538	-3.34363	6.01e-11	1.17e-09
LONRF2	-3.29934	3.69599	6.24e-11	1.22e-09
EFCAB12	-2.26345	-0.589133	6.53e-11	1.27e-09
NMUR2	-3.66555	-0.535392	6.64e-11	1.29e-09
PTTG1	2.28794	5.32938	7.02e-11	1.36e-09
CKS2	2.2488	5.28355	7.19e-11	1.39e-09
LDHD	-2.3785	3.0557	7.58e-11	1.47e-09
CENPW	2.64391	4.09013	8.19e-11	1.58e-09
PTK7	2.12473	7.44668	8.72e-11	1.68e-09
MCM7	2.00817	7.27131	9.36e-11	1.79e-09
BUB1B	2.11858	5.1145	9.43e-11	1.8e-09
KRTAP3-2	-6.31416	0.822356	9.57e-11	1.83e-09
PHYHIP	-2.58418	2.06852	9.66e-11	1.84e-09
CIP2A	2.2662	4.23184	9.7e-11	1.85e-09
TICRR	2.28668	4.93276	9.71e-11	1.85e-09
GINS2	2.37756	4.15591	9.94e-11	1.89e-09
SNX10	2.45518	4.69912	1.01e-10	1.92e-09
CADM2	-3.53136	1.52679	1.05e-10	1.99e-09
CENPF	2.31662	7.15513	1.07e-10	2.01e-09
FER1L6	-3.1921	3.49109	1.12e-10	2.11e-09
FHL5	-2.48198	0.75072	1.15e-10	2.16e-09
CADPS2	-2.06402	4.32714	1.16e-10	2.18e-09
XRCC2	2.25905	3.62989	1.2e-10	2.25e-09
ADAMTS12	3.93423	5.08301	1.22e-10	2.28e-09
SHCBP1	2.05352	4.2125	1.3e-10	2.43e-09
HSD3B2	-3.59355	-3.59959	1.41e-10	2.63e-09
TP63	3.6624	9.43208	1.44e-10	2.67e-09
COBL	-2.73357	4.80569	1.48e-10	2.76e-09
MYO5C	-2.12134	4.76914	1.52e-10	2.82e-09
MOGAT3	-3.21576	-2.194	1.61e-10	2.97e-09
MYZAP	-2.82404	1.55318	1.73e-10	3.18e-09
GPRASP1	-2.0985	2.29647	1.85e-10	3.4e-09
ASPHD1	-2.25919	1.94262	1.86e-10	3.43e-09
CXCL17	-3.20501	5.92628	1.88e-10	3.46e-09
ADCYAP1	-2.84248	0.194718	1.93e-10	3.54e-09
PRRX2	2.89309	3.69529	1.95e-10	3.58e-09
SLC4A1	-2.87664	-1.64689	1.98e-10	3.63e-09
CARTPT	-4.13515	-1.51491	1.99e-10	3.64e-09
GPR20	-2.25978	-1.41994	2.06e-10	3.76e-09
CDX1	-3.23973	0.851035	2.1e-10	3.83e-09
CCL25	-3.69256	-2.20188	2.13e-10	3.87e-09
MCM2	2.35582	6.7834	2.13e-10	3.88e-09
CEACAM18	-4.59416	-3.52393	2.16e-10	3.93e-09
TOP2A	2.25632	7.79585	2.22e-10	4.03e-09
COL7A1	3.07256	8.42906	2.29e-10	4.15e-09
CA3	-2.46525	-0.445398	2.31e-10	4.18e-09
TUBA3C	-3.2895	-2.69936	2.33e-10	4.2e-09
G0S2	-2.53119	3.40601	2.34e-10	4.23e-09
BUB1	2.15246	5.32291	2.36e-10	4.24e-09
ERICH4	-2.77901	-3.48118	2.42e-10	4.35e-09
CDT1	2.16878	5.3313	2.48e-10	4.45e-09
CPM	-2.08764	4.94574	2.5e-10	4.49e-09
ADRA1A	-3.14223	-1.52498	2.58e-10	4.62e-09
COL11A1	6.77145	5.9075	2.81e-10	5e-09
PIMREG	2.68981	3.49171	2.82e-10	5.01e-09
HIF3A	-3.05711	3.35614	2.88e-10	5.11e-09
SEC14L6	-2.68596	-1.12723	2.9e-10	5.14e-09
CCNB2	2.12099	5.38056	3.01e-10	5.32e-09
GDAP1L1	-2.44082	-1.77242	3.21e-10	5.67e-09
HOXD10	4.38435	4.00625	3.23e-10	5.69e-09
AMPD1	-2.9269	-1.9569	3.26e-10	5.73e-09
GNG7	-2.3925	2.4761	3.31e-10	5.81e-09
CEP55	2.28165	5.69847	3.32e-10	5.82e-09
SLC7A14	-3.38099	-1.38423	3.51e-10	6.14e-09
NMUR1	-2.48143	-0.699425	3.58e-10	6.25e-09
MACROD2	-2.1964	0.931325	3.66e-10	6.38e-09
PLA1A	-2.23823	0.424626	3.72e-10	6.47e-09
PKDCC	-2.68744	3.86368	3.72e-10	6.47e-09
MOGAT1	-3.39843	-3.17345	3.82e-10	6.64e-09
ASPM	2.22543	6.04079	3.87e-10	6.71e-09
HTR1B	-2.44929	-1.77379	4.05e-10	7.01e-09
DUSP9	3.97908	2.75737	4.1e-10	7.09e-09
FOXM1	2.40893	6.84281	4.14e-10	7.14e-09
EN1	6.06975	4.00397	4.31e-10	7.42e-09
TMEM132D	-3.19911	-3.29085	4.44e-10	7.63e-09
CTHRC1	3.30731	5.57799	4.5e-10	7.72e-09
DDIAS	2.47521	4.08687	4.93e-10	8.45e-09
RAD51	2.03722	3.71315	5e-10	8.55e-09
PCDH11Y	-3.23417	-3.05756	5.15e-10	8.8e-09
NCAPG	2.06481	4.9785	5.44e-10	9.28e-09
CDH3	3.21215	8.45906	5.54e-10	9.44e-09
PLCZ1	-2.91546	-1.39094	5.62e-10	9.55e-09
HOXD11	4.57509	2.77328	5.68e-10	9.63e-09
ITM2A	-2.11997	3.06062	5.77e-10	9.77e-09
PRR11	2.16514	5.40386	5.8e-10	9.82e-09
TMPRSS3	-2.87837	1.80641	5.98e-10	1.01e-08
HEPH	-2.10574	4.40761	6.1e-10	1.03e-08
PF4	-2.89471	-2.73004	6.11e-10	1.03e-08
ISX	-3.56351	-3.19567	6.13e-10	1.03e-08
LYVE1	-2.80786	2.85323	6.22e-10	1.05e-08
TOX	-2.21973	3.11171	6.23e-10	1.05e-08
NXPH4	3.83074	5.05636	6.28e-10	1.05e-08
ADGRG2	-2.47668	1.48139	6.3e-10	1.06e-08
MUC2	-4.49664	4.36274	6.31e-10	1.06e-08
SPDEF	-3.59838	2.70829	6.43e-10	1.08e-08
COL4A3	-2.78284	1.62923	6.64e-10	1.11e-08
SIGLEC15	-2.25213	-0.0668961	7.52e-10	1.25e-08
TNFRSF17	-2.32027	-0.40807	7.6e-10	1.26e-08
FBXL13	-2.40131	1.30902	7.61e-10	1.26e-08
DUSP26	-2.47734	-1.44017	7.73e-10	1.28e-08
MELK	2.24628	5.03595	7.92e-10	1.31e-08
PRLR	-2.77799	3.46296	8.05e-10	1.33e-08
SIX1	3.41023	3.39612	8.53e-10	1.4e-08
MYBL2	2.28951	6.68369	8.72e-10	1.43e-08
TPSG1	-2.74965	-1.9174	8.79e-10	1.44e-08
SYCP3	-2.45214	0.0163753	9.21e-10	1.5e-08
NDC80	2.20326	4.31353	9.81e-10	1.59e-08
KLHDC7A	-3.45848	1.36338	9.95e-10	1.61e-08
AFF3	-2.69538	2.38156	1.02e-09	1.65e-08
ORC1	2.16747	3.87714	1.03e-09	1.67e-08
PLS1	-2.01101	5.08859	1.04e-09	1.68e-08
FCGBP	-2.55375	5.46093	1.11e-09	1.79e-08
EPOP	2.02231	3.60218	1.26e-09	2.01e-08
SVOP	-2.57676	-2.28828	1.3e-09	2.06e-08
FOLR1	-3.79518	1.96444	1.3e-09	2.06e-08
RBPMS2	-2.66321	3.78687	1.3e-09	2.06e-08
FAM3B	-3.34587	3.59705	1.31e-09	2.08e-08
SKA1	2.19571	3.5342	1.32e-09	2.09e-08
KLHDC8A	-2.53079	1.42119	1.33e-09	2.11e-08
RD3	-2.69303	-3.26982	1.36e-09	2.16e-08
B4GALNT1	3.9347	4.6539	1.43e-09	2.26e-08
SPACA4	-2.20005	-0.185806	1.45e-09	2.28e-08
ESM1	3.43258	2.02064	1.46e-09	2.31e-08
PDE1C	-2.30529	1.87418	1.51e-09	2.38e-08
IL11	3.66788	1.90771	1.52e-09	2.39e-08
AKAP12	-2.38174	5.56576	1.53e-09	2.4e-08
CENPI	2.02771	3.25529	1.54e-09	2.42e-08
PBK	2.28506	4.50854	1.69e-09	2.65e-08
PRSS33	-3.00134	-2.99432	1.71e-09	2.67e-08
FXYD1	-2.29479	-0.700611	1.72e-09	2.68e-08
LIPM	-2.27767	0.857592	1.75e-09	2.73e-08
FHL1	-2.57896	6.55835	1.76e-09	2.75e-08
CCDC68	-2.40573	2.43774	1.87e-09	2.9e-08
GGT1	-2.22562	3.32436	1.9e-09	2.94e-08
CTH	-2.00632	1.80899	1.99e-09	3.07e-08
F11	-3.78985	-2.72861	2.05e-09	3.16e-08
UBXN10	-2.62108	1.86868	2.1e-09	3.23e-08
DLX4	2.95593	1.80353	2.13e-09	3.28e-08
WSCD1	-2.37305	0.721844	2.14e-09	3.29e-08
CRISPLD2	-2.08332	6.50068	2.15e-09	3.3e-08
PMAIP1	2.0644	4.64487	2.23e-09	3.41e-08
ISM2	-2.97215	0.528191	2.25e-09	3.45e-08
TRPC5	-3.17305	-3.14588	2.37e-09	3.6e-08
PI16	-3.86412	3.42976	2.38e-09	3.61e-08
KCNA10	-3.16898	-4.31356	2.47e-09	3.74e-08
FGG	-4.84515	1.17496	2.55e-09	3.85e-08
ACTN2	-2.93417	0.494126	2.65e-09	4e-08
FZD2	2.56389	3.12193	2.69e-09	4.04e-08
SCG2	-2.33745	0.899564	2.7e-09	4.05e-08
GPRIN1	2.3449	4.46809	2.73e-09	4.09e-08
ST6GALNAC2	2.20154	5.85438	2.86e-09	4.28e-08
FAM135B	-3.2111	-1.40988	2.88e-09	4.31e-08
SKA3	2.04982	4.01029	2.92e-09	4.36e-08
TRIM31	-2.87244	1.59214	2.93e-09	4.37e-08
POLQ	2.15507	4.71659	2.97e-09	4.42e-08
TRIM40	-3.71507	-2.34331	2.99e-09	4.45e-08
GAS2	-2.86814	0.162423	3.04e-09	4.52e-08
LGI1	-3.10973	-1.70885	3.05e-09	4.53e-08
CDC25B	2.06677	6.92804	3.22e-09	4.76e-08
ACSL5	-2.20644	4.74477	3.33e-09	4.9e-08
DOK7	-2.25743	0.796058	3.33e-09	4.91e-08
GFRA2	-2.26922	-0.158334	3.41e-09	5e-08
WNT3	2.5449	2.17708	3.47e-09	5.08e-08
STC2	3.30388	4.6649	3.67e-09	5.35e-08
ABCA9	-2.41825	1.71704	3.85e-09	5.61e-08
GRIN2B	-2.5967	-1.13603	3.96e-09	5.76e-08
SPERT	4.65364	-0.199945	4.15e-09	6.03e-08
GLP2R	-2.87801	-0.530994	4.18e-09	6.07e-08
LINGO4	-3.11964	-2.33234	4.22e-09	6.13e-08
HOXD13	5.38806	3.13874	4.44e-09	6.41e-08
RBP1	2.94066	6.11443	4.52e-09	6.52e-08
PCDH9	-2.94817	2.98672	4.61e-09	6.64e-08
PAK3	-2.95661	1.41942	4.8e-09	6.88e-08
TEX49	-3.68181	-3.4127	4.87e-09	6.96e-08
MMRN1	-2.66014	2.77731	5e-09	7.12e-08
ULBP1	3.92914	1.70389	5.08e-09	7.23e-08
ARL14	-3.12536	1.93782	5.1e-09	7.25e-08
CYP17A1	-2.23461	-1.71441	5.1e-09	7.25e-08
NOX4	2.83419	1.83039	5.12e-09	7.26e-08
KCNK15	-2.34285	1.19066	5.15e-09	7.31e-08
TSPAN1	-2.60917	5.31725	5.27e-09	7.46e-08
SERPINH1	2.10351	7.96878	5.63e-09	7.96e-08
PBOV1	-2.85546	-3.5135	5.8e-09	8.19e-08
ENPP3	-2.47359	-1.0447	5.89e-09	8.31e-08
SPINK13	-3.39579	-2.09062	5.94e-09	8.38e-08
C1QTNF6	2.99133	5.08838	6.58e-09	9.23e-08
S1PR5	2.92688	4.28733	6.66e-09	9.32e-08
MAPK12	2.36285	3.87478	6.97e-09	9.73e-08
KIF12	-2.50003	1.11698	6.99e-09	9.76e-08
ZMAT1	-2.36064	2.09164	7.34e-09	1.02e-07
DPP10	-3.35229	-0.360724	7.42e-09	1.03e-07
CLDN1	3.20128	8.46029	7.42e-09	1.03e-07
TGFBR3	-2.25593	5.25821	7.5e-09	1.04e-07
BHMT	-2.48256	-0.191275	7.69e-09	1.07e-07
WDR66	2.92119	5.26322	7.75e-09	1.07e-07
CDX2	-3.51457	1.67305	8.04e-09	1.11e-07
NEIL3	2.37596	2.6673	8.48e-09	1.17e-07
MS4A2	-2.08834	0.467134	8.49e-09	1.17e-07
B4GALNT2	-3.51294	3.09289	8.88e-09	1.22e-07
SBSPON	-2.35124	3.46511	8.95e-09	1.23e-07
MELTF	2.80806	5.7857	8.99e-09	1.23e-07
NDNF	-2.19296	1.2537	9.21e-09	1.26e-07
PPP1R1A	-3.44059	0.299595	9.51e-09	1.3e-07
DLX6	4.78512	2.29559	9.56e-09	1.31e-07
PRSS2	-3.93854	0.299014	9.74e-09	1.33e-07
MEDAG	-2.31053	3.22971	1.04e-08	1.41e-07
PODN	-2.22918	4.61091	1.04e-08	1.41e-07
ERVMER34-1	2.94919	4.08028	1.06e-08	1.43e-07
CEP19	2.5355	2.38893	1.07e-08	1.45e-07
NXF3	-2.38888	-1.70759	1.08e-08	1.45e-07
RETNLB	-2.69062	-1.77438	1.09e-08	1.47e-07
KRTAP5-5	-3.32043	-4.59368	1.1e-08	1.48e-07
HJURP	2.11249	4.41652	1.1e-08	1.48e-07
IL1RAP	2.18937	6.3744	1.1e-08	1.48e-07
IBSP	4.06496	0.354943	1.15e-08	1.54e-07
MAPT	-2.20262	2.38676	1.21e-08	1.61e-07
INSC	-2.39788	-1.59842	1.27e-08	1.68e-07
SLC13A3	-2.09118	2.24703	1.31e-08	1.73e-07
KIAA1549L	3.92713	4.96735	1.34e-08	1.77e-07
TCTEX1D2	2.16573	2.7107	1.36e-08	1.79e-07
FEV	-3.41985	-2.58588	1.41e-08	1.86e-07
ISG15	3.44615	6.57333	1.42e-08	1.88e-07
KCNS3	2.81449	4.5322	1.49e-08	1.96e-07
HMMR	2.00715	4.73628	1.51e-08	1.98e-07
PDZK1	-2.02242	-0.555012	1.52e-08	2e-07
PTPN5	-2.42377	-1.25613	1.61e-08	2.11e-07
FAM83E	-2.27469	3.65464	1.68e-08	2.2e-07
ADORA2B	2.21497	4.17242	1.71e-08	2.23e-07
HIST1H1E	2.47288	1.1263	1.72e-08	2.23e-07
ARSI	3.35286	4.02691	1.72e-08	2.24e-07
CLEC5A	3.04646	1.82241	1.73e-08	2.25e-07
CADM3	-2.81774	1.7354	1.74e-08	2.26e-07
MMP17	2.45449	2.71604	1.76e-08	2.28e-07
PLPP4	4.16451	1.61143	1.79e-08	2.31e-07
BTN1A1	-2.39838	-2.62559	1.8e-08	2.33e-07
EVA1A	3.81043	2.58478	1.87e-08	2.41e-07
FAM72D	2.16461	0.374134	1.89e-08	2.43e-07
COL27A1	2.18529	6.43297	1.91e-08	2.46e-07
RSPO1	-2.02323	-1.78643	1.92e-08	2.47e-07
ST18	-2.33251	-0.740929	1.93e-08	2.48e-07
SMOC2	-2.38304	5.11676	1.93e-08	2.48e-07
RUNX3	2.22425	5.3815	2.03e-08	2.59e-07
ABCC9	-2.26378	3.94809	2.04e-08	2.61e-07
MMP13	7.03134	6.01632	2.06e-08	2.63e-07
SMLR1	-3.16322	-3.79753	2.16e-08	2.75e-07
ADGRG5	-2.14433	2.21715	2.17e-08	2.76e-07
AMHR2	-2.89509	-2.04457	2.18e-08	2.77e-07
CST1	4.9574	5.2888	2.27e-08	2.87e-07
GRIN2A	-2.97138	1.95222	2.28e-08	2.89e-07
PCSK9	3.46777	5.05525	2.3e-08	2.9e-07
GNAO1	-2.15858	3.50503	2.38e-08	3e-07
CLEC19A	-3.45617	-3.56307	2.4e-08	3.02e-07
STK32A	-2.26396	-0.202516	2.43e-08	3.05e-07
MMP3	4.50744	4.70776	2.47e-08	3.1e-07
ALPI	-4.05408	-3.01798	2.49e-08	3.13e-07
CPNE6	-2.59542	-2.15996	2.65e-08	3.31e-07
TMEFF2	-2.56644	-1.64384	2.68e-08	3.35e-07
KCNB1	-3.12684	2.00043	2.7e-08	3.38e-07
SPTBN4	-2.02237	1.03615	2.71e-08	3.38e-07
CXCL8	4.278	6.14102	2.78e-08	3.46e-07
OLFM2	3.08039	4.95603	2.91e-08	3.62e-07
MND1	2.15787	2.227	2.92e-08	3.62e-07
HIST2H2AC	2.14591	-0.377072	2.92e-08	3.63e-07
TNNT1	4.10493	3.70251	3.09e-08	3.82e-07
PRKCG	-2.52749	-1.76612	3.2e-08	3.95e-07
CHST1	3.72903	4.28898	3.22e-08	3.98e-07
TRPC7	-2.52493	-3.78074	3.24e-08	4e-07
GNAZ	-2.12676	2.83789	3.33e-08	4.1e-07
PLCH1	-2.25478	2.08026	3.34e-08	4.1e-07
RAD51AP1	2.27096	4.34546	3.6e-08	4.4e-07
GINS4	2.23094	3.46855	3.64e-08	4.44e-07
FOXS1	2.25635	0.393766	3.65e-08	4.45e-07
FAM72B	2.25529	1.20612	3.77e-08	4.59e-07
ADGRG4	-3.33265	-2.62983	3.97e-08	4.81e-07
FOXL2	5.36643	2.34944	4.04e-08	4.89e-07
KCTD8	-3.40943	-0.900387	4.07e-08	4.92e-07
FGF10	-2.83446	-0.647059	4.13e-08	4.99e-07
SYCN	-2.92717	-3.22038	4.13e-08	4.99e-07
ERFE	2.80873	1.8451	4.2e-08	5.06e-07
CA9	-2.86792	5.22789	4.2e-08	5.06e-07
MAS1L	-3.32822	-4.11932	4.24e-08	5.11e-07
P2RX1	-2.25984	1.17663	4.26e-08	5.13e-07
GPR176	2.92735	4.27507	4.28e-08	5.14e-07
TNFSF10	2.36657	7.3986	4.3e-08	5.16e-07
TMEM139	-2.51189	0.170235	4.31e-08	5.16e-07
CDH13	2.69829	6.04389	4.32e-08	5.18e-07
GABRB3	-2.96704	2.43479	4.37e-08	5.23e-07
CAPN13	-3.08836	3.26048	4.39e-08	5.25e-07
COL24A1	2.83685	2.09569	4.42e-08	5.28e-07
TCEAL2	-2.84467	1.0207	4.56e-08	5.43e-07
ICAM5	3.08618	2.0717	4.81e-08	5.71e-07
TREM1	4.13404	2.6923	4.99e-08	5.92e-07
FJX1	2.0928	4.42168	5.09e-08	6.02e-07
LTK	-2.34662	0.685346	5.1e-08	6.03e-07
GABRE	3.11225	6.49008	5.32e-08	6.28e-07
GRIA2	-2.86795	-1.41416	5.36e-08	6.32e-07
BEND6	2.30024	2.1563	5.54e-08	6.52e-07
NPY	-3.76861	-1.15825	5.58e-08	6.56e-07
S100A7A	7.2092	6.13329	6.31e-08	7.37e-07
ALG1L	2.50698	2.79753	6.39e-08	7.44e-07
CTNNA2	-2.86026	-2.01556	6.55e-08	7.63e-07
BEND7	-2.03576	2.90763	6.72e-08	7.82e-07
G6PC2	-3.78672	-3.4317	6.75e-08	7.84e-07
FSIP2	-2.34996	2.60671	6.82e-08	7.92e-07
MAATS1	-2.63869	0.691345	6.9e-08	8e-07
LRRC52	-3.26011	-4.34232	6.92e-08	8.02e-07
DRGX	-2.88463	-3.70944	6.99e-08	8.09e-07
S100A7	6.98209	9.48964	7.19e-08	8.3e-07
ABCA6	-2.06663	2.06302	7.27e-08	8.38e-07
TMC3	-2.02375	-2.50514	7.72e-08	8.85e-07
CA2	-2.531	6.90096	7.72e-08	8.85e-07
C12orf54	3.43821	1.57392	7.82e-08	8.96e-07
GP2	-4.46078	2.98782	7.87e-08	9.01e-07
GPR50	7.67182	1.47484	7.88e-08	9.01e-07
MGAM2	-3.4967	1.98551	7.88e-08	9.01e-07
HOXC13	3.10348	2.85643	7.98e-08	9.11e-07
TREM2	2.69517	2.79794	8.25e-08	9.4e-07
MTTP	-2.56906	-0.900137	8.48e-08	9.65e-07
AC091167.6	-2.21428	-3.85442	8.49e-08	9.66e-07
C7	-3.47347	5.26894	8.53e-08	9.69e-07
MMP12	4.71826	5.90943	8.98e-08	1.02e-06
FAM47E-STBD1	-2.74249	-4.13146	9.02e-08	1.02e-06
HES4	2.20673	4.7075	9.2e-08	1.04e-06
ANK2	-2.38421	3.78218	9.2e-08	1.04e-06
ALX1	6.15525	0.137114	9.64e-08	1.08e-06
VWA2	-2.40001	3.34413	9.66e-08	1.08e-06
TMCC2	2.24192	3.1389	9.78e-08	1.09e-06
SVIP	-2.02382	3.82473	1.01e-07	1.12e-06
SLC2A12	-2.19652	4.37898	1.01e-07	1.12e-06
NWD1	-2.5079	1.69098	1.04e-07	1.15e-06
UMOD	-3.59096	-3.46469	1.05e-07	1.17e-06
CIB4	-2.75684	-3.94865	1.05e-07	1.17e-06
SCN4A	-2.40688	-0.942285	1.05e-07	1.17e-06
HMCN2	-2.3683	3.49645	1.11e-07	1.23e-06
RAB9B	-2.19573	1.07724	1.13e-07	1.24e-06
PLA2G12B	-3.00207	-3.95118	1.17e-07	1.29e-06
GDF7	-2.271	1.11011	1.17e-07	1.29e-06
GPC1	2.20979	9.06666	1.19e-07	1.3e-06
HS6ST2	3.60229	4.55058	1.2e-07	1.32e-06
PHOX2B	-3.40809	-2.99631	1.2e-07	1.32e-06
UCN2	3.23151	2.08607	1.23e-07	1.34e-06
CELA2A	-2.49527	-3.04891	1.24e-07	1.36e-06
DSPP	3.38999	-0.283251	1.25e-07	1.36e-06
DNASE2B	-2.94955	-2.49109	1.26e-07	1.37e-06
CYP2C9	-2.82668	0.986054	1.29e-07	1.4e-06
HOXB6	-2.02342	1.56687	1.29e-07	1.41e-06
VAX1	5.2941	1.03338	1.32e-07	1.44e-06
PPP1R1B	-3.14768	3.26066	1.36e-07	1.47e-06
TFRC	2.31139	8.7755	1.37e-07	1.48e-06
LHX2	4.0536	2.05449	1.4e-07	1.52e-06
EN2	4.38938	1.52535	1.43e-07	1.54e-06
DEFB126	4.9632	-1.58439	1.45e-07	1.56e-06
CCL23	-2.38979	-1.94546	1.52e-07	1.63e-06
DEFA6	-3.9137	-4.27645	1.53e-07	1.64e-06
TNC	3.38619	10.2193	1.56e-07	1.67e-06
PRR5L	2.53811	3.74042	1.58e-07	1.69e-06
GALNT15	-2.12101	2.75801	1.59e-07	1.7e-06
NKD2	2.85632	3.83278	1.7e-07	1.81e-06
PCK1	-3.02277	0.78858	1.76e-07	1.88e-06
RGS1	2.13639	5.2296	1.81e-07	1.92e-06
MMP9	3.77019	5.82134	1.92e-07	2.03e-06
IL33	-2.39837	4.05764	1.96e-07	2.07e-06
FGL2	-2.46484	5.7759	2.02e-07	2.12e-06
WNT2	3.57016	2.09008	2.09e-07	2.19e-06
ONECUT2	-2.17636	2.69113	2.25e-07	2.35e-06
HOXC8	2.81125	1.9126	2.3e-07	2.4e-06
RBFOX3	-2.23552	-0.343752	2.33e-07	2.43e-06
B3GNT6	-3.26175	2.36158	2.34e-07	2.43e-06
SLC4A10	-2.40152	-2.14674	2.34e-07	2.43e-06
LRRC26	-3.13964	1.13066	2.42e-07	2.52e-06
ERP27	-2.17101	1.59308	2.43e-07	2.52e-06
NT5C1A	-2.63192	-3.14126	2.43e-07	2.52e-06
SCGB2A1	-3.56362	-0.895382	2.49e-07	2.58e-06
TM4SF19	3.77166	2.93924	2.61e-07	2.69e-06
STON2	2.02779	5.82377	2.61e-07	2.69e-06
C12orf56	2.88403	2.72947	2.67e-07	2.75e-06
ISL1	-3.26909	0.30415	2.71e-07	2.79e-06
SUGCT	2.26912	2.40852	2.81e-07	2.88e-06
RFX8	2.6734	-0.298786	2.89e-07	2.95e-06
HHIP	-2.66264	2.43712	3.02e-07	3.07e-06
LAMC2	3.21368	9.60695	3.03e-07	3.09e-06
SP8	5.82573	0.372093	3.04e-07	3.1e-06
OLR1	4.15786	3.30901	3.07e-07	3.12e-06
SORBS1	-2.44957	7.00416	3.12e-07	3.17e-06
PODNL1	2.39176	3.88017	3.22e-07	3.27e-06
FBXO43	2.46836	0.695685	3.26e-07	3.3e-06
TCHH	5.50128	4.18183	3.29e-07	3.33e-06
HOXD8	2.04213	2.29205	3.3e-07	3.33e-06
TMEM45A	3.27219	6.21289	3.42e-07	3.45e-06
AMELX	-2.60021	-4.35424	3.48e-07	3.51e-06
ENPP5	-2.32863	2.82471	3.59e-07	3.61e-06
SHISA3	-2.88589	0.45334	3.64e-07	3.65e-06
TGFBI	3.04193	8.89646	3.89e-07	3.87e-06
NPBWR1	5.46386	1.70713	3.92e-07	3.9e-06
CLDN16	3.04579	1.15081	4.01e-07	3.99e-06
DUOXA2	-2.21295	3.18505	4.01e-07	3.99e-06
GUCA2A	-2.77537	-4.51658	4.06e-07	4.03e-06
FBXO39	3.0165	0.422714	4.17e-07	4.13e-06
RNASE10	5.6889	1.41831	4.2e-07	4.15e-06
ALDH1A1	-2.63258	7.56706	4.32e-07	4.26e-06
RYR1	2.57184	4.92954	4.44e-07	4.37e-06
DLG2	-2.00152	1.54572	4.51e-07	4.44e-06
NEGR1	-2.2403	3.30094	4.54e-07	4.47e-06
GALNT16	-2.26269	1.15131	4.57e-07	4.49e-06
SDS	2.24407	2.27996	4.72e-07	4.62e-06
PTPRN	-2.3914	1.11886	4.81e-07	4.7e-06
PPFIA2	-2.10928	-0.766716	4.85e-07	4.73e-06
MMP10	5.00819	5.00478	4.86e-07	4.75e-06
PEG3	-2.00744	1.3214	4.89e-07	4.77e-06
FAM198A	-2.09309	0.66735	5.15e-07	5.01e-06
RPRM	-2.18963	1.00474	5.17e-07	5.03e-06
CCNA1	6.05491	4.4813	5.28e-07	5.12e-06
MKRN3	2.95398	2.22378	5.35e-07	5.18e-06
ANGPTL1	-2.61534	2.52231	5.47e-07	5.29e-06
XCL1	2.27269	1.08346	5.75e-07	5.55e-06
GJB7	2.7567	1.06955	5.75e-07	5.55e-06
GPIHBP1	-2.21158	-0.404184	5.99e-07	5.75e-06
HCAR1	-2.83673	0.646837	6.01e-07	5.76e-06
NCAM1	-2.44259	3.51156	6.07e-07	5.82e-06
ADGRB3	-2.43127	-0.228099	6.28e-07	5.99e-06
RNF128	-2.18157	4.66263	6.57e-07	6.23e-06
PLA2G7	2.32181	2.72269	6.62e-07	6.27e-06
HES7	3.13309	-1.21078	6.77e-07	6.4e-06
PTHLH	3.7517	7.2188	6.91e-07	6.51e-06
GJA3	3.59152	3.761	6.98e-07	6.57e-06
TRPM5	-2.74303	-1.30308	7.11e-07	6.68e-06
PLCB4	-2.03177	4.13254	7.11e-07	6.68e-06
PTH	-3.61091	-4.15507	7.13e-07	6.7e-06
INHBA	3.20759	6.90448	7.17e-07	6.72e-06
KRT17	3.56871	11.9116	7.2e-07	6.75e-06
VWA5B2	-2.08456	0.441698	7.5e-07	7.01e-06
NEXMIF	-2.60986	1.29194	7.96e-07	7.39e-06
HOXC9	2.47307	1.62975	7.98e-07	7.4e-06
NPY2R	-3.84182	-4.11676	7.98e-07	7.4e-06
GPC2	2.26499	0.726009	8.07e-07	7.47e-06
EPHA10	-2.32499	0.801604	8.43e-07	7.77e-06
CTSC	2.02327	8.32634	8.54e-07	7.85e-06
IL20	4.85766	0.177233	8.55e-07	7.86e-06
GABRQ	3.73923	2.62273	8.62e-07	7.91e-06
OAS2	2.19565	7.47136	8.73e-07	8e-06
MT4	-3.63992	-3.17064	8.77e-07	8.04e-06
F2	-2.50605	-2.58037	9.1e-07	8.31e-06
BASP1	2.58655	6.11388	9.16e-07	8.35e-06
NR4A3	-2.07871	3.77057	9.23e-07	8.4e-06
TWIST1	2.52139	3.13021	9.4e-07	8.55e-06
VSNL1	2.32758	6.07277	9.94e-07	8.98e-06
PGF	2.66352	4.60684	1.01e-06	9.13e-06
CXCL6	3.68548	3.29283	1.03e-06	9.27e-06
CNTN4	-2.02746	1.57679	1.06e-06	9.53e-06
TMEM26	2.54765	0.928681	1.06e-06	9.53e-06
HIST1H3B	3.76242	-1.14419	1.06e-06	9.53e-06
TM4SF19-TCTEX1D2	2.94128	-2.10186	1.07e-06	9.55e-06
ERICH2	-2.29511	-0.872746	1.09e-06	9.7e-06
LAMP5	3.03686	1.73858	1.1e-06	9.8e-06
COL1A1	3.06988	12.4247	1.12e-06	9.98e-06
RGS7BP	-2.48476	-0.339194	1.12e-06	9.99e-06
MYO18B	-2.62548	1.17956	1.16e-06	1.03e-05
TENM2	3.29117	7.49909	1.16e-06	1.03e-05
PRR15	-2.2119	2.94614	1.17e-06	1.03e-05
KRT9	3.59805	0.651528	1.18e-06	1.05e-05
APOE	2.42703	6.65424	1.18e-06	1.05e-05
CASQ2	-2.57922	2.72063	1.19e-06	1.05e-05
CES3	-2.47917	3.12687	1.19e-06	1.05e-05
CCDC33	-2.60898	-2.72806	1.21e-06	1.07e-05
SLC47A1	3.11589	2.81529	1.26e-06	1.11e-05
FAM72C	2.16683	-0.128684	1.27e-06	1.12e-05
PLIN4	-2.41263	4.32303	1.34e-06	1.18e-05
SEMA3E	-2.59354	2.34518	1.35e-06	1.18e-05
GPR142	-2.42667	-2.51571	1.37e-06	1.19e-05
PANX2	3.44564	4.93057	1.38e-06	1.21e-05
PDPN	2.49624	6.43354	1.39e-06	1.21e-05
ADH1B	-3.15004	3.42216	1.39e-06	1.21e-05
TMOD1	-2.19259	2.7643	1.41e-06	1.22e-05
DPF1	2.68191	2.58438	1.42e-06	1.23e-05
GABRP	-2.77214	5.41158	1.54e-06	1.34e-05
CLEC7A	2.75907	4.32014	1.57e-06	1.36e-05
PLA2G2C	-2.28852	-3.6489	1.59e-06	1.37e-05
CCDC198	-2.63927	-2.39488	1.6e-06	1.38e-05
DEGS2	-2.06367	3.77049	1.64e-06	1.41e-05
GSC	3.7369	-0.280425	1.68e-06	1.44e-05
DUOX2	-2.05414	6.56093	1.69e-06	1.44e-05
DLX5	3.70469	4.43791	1.7e-06	1.46e-05
TFAP2C	2.00063	5.72808	1.71e-06	1.46e-05
ALKAL2	-2.40945	0.720521	1.77e-06	1.51e-05
FADD	2.1697	5.18127	1.78e-06	1.51e-05
IQCA1	3.05599	2.9748	1.82e-06	1.54e-05
SPATA8	-2.66639	-4.07459	1.84e-06	1.56e-05
CNGB1	4.68994	3.78298	1.89e-06	1.6e-05
CHST2	3.02651	5.80592	1.9e-06	1.61e-05
CEACAM20	-2.64856	-3.09863	1.91e-06	1.61e-05
CCDC160	-2.70796	-2.3194	1.96e-06	1.66e-05
SLC2A9	2.0604	3.89289	1.98e-06	1.67e-05
IQCM	3.86823	-1.76205	2.02e-06	1.7e-05
SRRM3	2.10388	3.94211	2.04e-06	1.71e-05
PFN2	2.05346	7.50148	2.05e-06	1.72e-05
MISP	-2.03032	4.63534	2.1e-06	1.75e-05
SPOCD1	2.36299	2.41859	2.11e-06	1.76e-05
LOXL2	2.14017	6.19376	2.13e-06	1.78e-05
COL5A3	2.35859	6.05157	2.18e-06	1.81e-05
GSTA3	-3.0617	-0.711366	2.21e-06	1.83e-05
CSF2	4.65985	0.206941	2.24e-06	1.85e-05
SMIM22	-2.45023	3.08585	2.25e-06	1.86e-05
LDB3	-2.27294	2.44031	2.29e-06	1.89e-05
MT1HL1	-2.33111	-3.9231	2.36e-06	1.95e-05
AQP7	-2.22406	-0.837559	2.37e-06	1.95e-05
KRT74	2.74729	-0.13429	2.39e-06	1.96e-05
WNT7A	4.18271	2.36499	2.39e-06	1.97e-05
MT1B	-3.08572	-4.53803	2.4e-06	1.97e-05
CCL26	3.23564	0.528224	2.48e-06	2.04e-05
SOST	8.47385	4.32062	2.51e-06	2.06e-05
TPO	-2.06564	0.253828	2.56e-06	2.1e-05
ADCY5	-2.37759	4.69418	2.61e-06	2.13e-05
HCN1	-2.56888	-2.54612	2.62e-06	2.14e-05
CILP	-2.58738	3.82288	2.65e-06	2.16e-05
MICB	2.29417	3.20576	2.7e-06	2.2e-05
NCF2	2.09032	4.1389	2.74e-06	2.23e-05
TFAP2A	2.106	6.7329	2.77e-06	2.25e-05
COL12A1	2.20363	8.50148	2.86e-06	2.31e-05
PDZRN4	-2.43003	1.43955	2.91e-06	2.35e-05
CYP2C19	-2.4401	-2.75851	2.94e-06	2.37e-05
RELN	-2.00013	1.48587	2.95e-06	2.38e-05
TMEM252	-2.9312	-0.618185	2.96e-06	2.38e-05
H2BFWT	3.81577	-2.01838	2.96e-06	2.38e-05
FLNC	-2.3165	7.07324	2.96e-06	2.38e-05
CFAP65	-2.42332	-1.91951	2.96e-06	2.39e-05
FAT3	-2.37795	2.08149	2.98e-06	2.4e-05
CPS1	-2.23462	2.89824	3.01e-06	2.42e-05
SLC22A31	-2.66976	0.16808	3.04e-06	2.44e-05
ZNF114	2.57044	1.73171	3.06e-06	2.45e-05
SLC52A1	2.3407	3.01771	3.16e-06	2.53e-05
C1orf68	5.69713	-1.37644	3.18e-06	2.54e-05
DPP6	-2.54724	0.325282	3.19e-06	2.55e-05
GABRD	2.21451	-0.158198	3.25e-06	2.59e-05
SLC7A3	-3.25587	-0.996697	3.36e-06	2.67e-05
CILP2	2.88167	1.91443	3.49e-06	2.76e-05
ADAMTSL3	-2.2326	2.89137	3.54e-06	2.79e-05
SHOX2	2.826	2.22441	3.57e-06	2.81e-05
ELANE	-2.56113	-2.71549	3.58e-06	2.82e-05
TTC6	-2.35629	1.22031	3.71e-06	2.91e-05
S100P	-2.38705	5.58747	3.88e-06	3.03e-05
LGALS1	2.05205	7.67156	3.89e-06	3.04e-05
CAGE1	2.43321	-0.594329	4.02e-06	3.13e-05
MEST	2.08469	5.68394	4.12e-06	3.2e-05
FAM3D	-2.66274	3.8377	4.12e-06	3.2e-05
FCGR3A	2.47921	4.73094	4.13e-06	3.2e-05
MEX3A	2.66861	4.11349	4.14e-06	3.21e-05
LMOD2	-2.47843	-3.01052	4.19e-06	3.25e-05
ABCA13	3.85157	5.96948	4.19e-06	3.25e-05
HIST3H2BB	2.50435	0.731595	4.2e-06	3.25e-05
LY6H	-2.37061	-1.26353	4.21e-06	3.26e-05
MROH2A	-2.44924	0.288391	4.34e-06	3.34e-05
DEFA5	-3.753	-3.9285	4.43e-06	3.4e-05
THSD1	2.04103	3.65369	4.43e-06	3.4e-05
IFIT1	2.59997	5.20436	4.49e-06	3.45e-05
IGFL3	6.27069	1.70785	4.58e-06	3.5e-05
COL4A4	-2.30696	3.07482	4.61e-06	3.53e-05
PTGES	2.81806	5.03807	4.75e-06	3.62e-05
S100A3	2.13197	2.22435	4.75e-06	3.62e-05
2019-12-01	3.12063	-0.182809	4.77e-06	3.63e-05
STRA6	3.59753	4.61476	4.78e-06	3.64e-05
MSC	2.97056	4.60704	4.8e-06	3.66e-05
GIPC2	-2.01759	2.38151	4.85e-06	3.69e-05
EFNA2	-2.06209	-1.69451	4.88e-06	3.71e-05
KCNA7	2.27236	-0.849184	4.99e-06	3.78e-05
LIM2	-3.24444	-1.84443	5.07e-06	3.84e-05
C1QL4	3.29024	-1.13893	5.4e-06	4.05e-05
PMEPA1	2.0466	7.24853	5.41e-06	4.06e-05
SLC2A4	-2.21312	2.89917	5.44e-06	4.08e-05
CYP27C1	3.12849	3.23889	5.63e-06	4.21e-05
RYR2	-2.20954	3.72304	5.84e-06	4.35e-05
CSAG3	6.55012	0.407385	5.85e-06	4.35e-05
PLAC8	-2.10708	4.07965	5.99e-06	4.44e-05
OPCML	-2.04909	-1.36075	6e-06	4.45e-05
CNKSR2	-2.44906	1.28901	6.27e-06	4.63e-05
VXN	-2.12369	-0.379847	6.37e-06	4.69e-05
AOC1	-2.36833	3.32423	6.7e-06	4.92e-05
PTGIS	-2.33964	4.58972	6.98e-06	5.11e-05
ATP10B	-2.04149	4.62056	7.01e-06	5.13e-05
BGN	2.31922	9.04596	7.05e-06	5.15e-05
HIST1H3F	2.57561	-2.17973	7.06e-06	5.16e-05
PGBD5	2.75707	4.32724	7.2e-06	5.24e-05
CCDC196	-2.35522	-3.19466	7.33e-06	5.33e-05
PAEP	6.06177	0.0814467	7.5e-06	5.45e-05
HEY1	2.64297	4.54275	7.61e-06	5.52e-05
PRAME	4.48365	4.48193	7.79e-06	5.63e-05
MAMDC2	-2.18267	3.69432	7.88e-06	5.69e-05
POU6F2	3.21115	2.6855	7.94e-06	5.73e-05
IQCF6	-3.45659	-4.04064	8.01e-06	5.77e-05
LCE1F	6.39541	-1.21989	8.04e-06	5.79e-05
IFI6	2.61506	8.0716	8.15e-06	5.87e-05
KCNMA1	-2.23702	6.04595	8.45e-06	6.05e-05
MUCL1	6.50363	3.26764	8.61e-06	6.15e-05
IL12RB2	3.18499	2.89694	8.65e-06	6.17e-05
HOXB7	2.01902	3.57078	8.69e-06	6.19e-05
GDF10	-2.24019	-1.63482	9.15e-06	6.49e-05
ANOS1	2.04357	4.09883	9.21e-06	6.53e-05
GBP5	3.301	5.45058	9.47e-06	6.7e-05
IGF2BP3	3.28783	4.47331	9.49e-06	6.7e-05
CTSG	-2.10499	-0.204967	9.6e-06	6.78e-05
FRRS1L	-2.41317	1.38428	9.65e-06	6.81e-05
GBP1	2.14157	6.60312	9.75e-06	6.87e-05
KYNU	3.09585	5.34039	9.8e-06	6.9e-05
DDC	-2.44671	1.16055	9.82e-06	6.92e-05
DLL3	2.79276	-0.308436	9.97e-06	7e-05
TSPAN10	2.13639	2.07446	1e-05	7.04e-05
CCL7	4.41661	-1.32725	1e-05	7.04e-05
C5orf46	3.74514	-0.0969402	1.05e-05	7.34e-05
HIST1H2AL	2.18406	-2.54609	1.06e-05	7.41e-05
PPY	-2.31317	-3.97675	1.08e-05	7.52e-05
HS6ST3	-2.57933	0.638196	1.11e-05	7.7e-05
FAP	2.59927	4.21351	1.12e-05	7.76e-05
HOXC6	2.10968	2.40919	1.12e-05	7.76e-05
REG1B	-3.73766	-2.61439	1.14e-05	7.89e-05
HSPB7	-2.27323	4.17656	1.14e-05	7.93e-05
WNT3A	3.05962	2.74468	1.15e-05	7.93e-05
TNFAIP6	2.0781	3.18956	1.2e-05	8.28e-05
KRT81	6.20272	3.32239	1.27e-05	8.7e-05
CXCL1	3.92736	6.23069	1.3e-05	8.83e-05
SOX11	3.16921	1.2206	1.3e-05	8.83e-05
CCL4L2	2.63116	1.70669	1.33e-05	9.06e-05
CCDC177	4.11499	0.819335	1.36e-05	9.23e-05
CYP4A11	-2.19241	-2.957	1.37e-05	9.27e-05
AGTR1	-2.08308	0.263264	1.38e-05	9.36e-05
LCE1C	4.05305	-0.870423	1.39e-05	9.41e-05
MT1A	-2.58111	0.899486	1.4e-05	9.47e-05
CEACAM16	-2.49365	-2.54491	1.44e-05	9.66e-05
MLN	-2.53223	-3.94645	1.45e-05	9.72e-05
MAGEA11	7.25693	2.73779	1.5e-05	0.000100118
KRT75	4.64045	4.82739	1.52e-05	0.000101649
MMP1	3.24856	7.44844	1.53e-05	0.000102282
APOC1	2.43526	4.04635	1.54e-05	0.0001027
ATP1A2	-2.69029	3.59383	1.55e-05	0.000103092
FOXC2	3.55538	3.45699	1.57e-05	0.000104278
TNIP3	2.81266	1.6416	1.59e-05	0.000105184
FMO1	2.28786	2.25661	1.65e-05	0.000109167
CA8	-2.41153	2.00357	1.67e-05	0.0001101
DLX1	3.05685	1.25959	1.74e-05	0.00011422
C19orf81	3.51499	-0.487282	1.74e-05	0.000114284
ZNF469	2.4255	4.88662	1.76e-05	0.000115374
CSAG2	5.54927	-0.844321	1.8e-05	0.000117489
NPHS2	-2.64924	-3.85062	1.81e-05	0.000118269
APOD	-2.04799	4.40194	1.84e-05	0.000119531
FZD10	2.65478	5.49956	1.93e-05	0.000124997
NKX6-3	-3.04781	-1.53608	1.94e-05	0.000125452
GNLY	2.84293	3.26718	1.95e-05	0.000126241
FOXD1	2.46346	3.41409	1.97e-05	0.000127361
STXBP6	-2.01072	2.56741	2.03e-05	0.000130509
TP73	2.02325	4.76843	2.05e-05	0.000131889
CABYR	3.23307	3.76799	2.06e-05	0.000132439
HIST1H2BI	2.60853	-2.61416	2.12e-05	0.000135975
SAMD5	-2.05088	3.98361	2.13e-05	0.000136413
SLCO1B3	4.58544	2.22323	2.18e-05	0.000139019
FOXI3	5.3541	1.6862	2.18e-05	0.000139401
SYCE3	2.01233	-1.71783	2.21e-05	0.000140526
PGM5	-2.41279	4.45111	2.22e-05	0.000140971
ZDHHC19	2.41966	-1.63114	2.22e-05	0.000141438
FAM221B	-2.01906	-2.5666	2.26e-05	0.000143445
RXFP4	-2.10497	-3.5848	2.35e-05	0.000148685
CALHM6	2.22883	1.9526	2.4e-05	0.000151486
ZNF536	-2.07335	0.0675749	2.46e-05	0.000154882
HIST1H2BL	2.05623	-1.50087	2.5e-05	0.000157199
SNCB	3.75369	0.163853	2.52e-05	0.000158198
CROCC2	-2.03377	-2.3634	2.53e-05	0.000158723
KREMEN2	3.10012	4.25608	2.54e-05	0.000159257
COX6B2	2.782	1.59483	2.61e-05	0.000163416
LRRIQ4	-2.07507	-1.92753	2.65e-05	0.000165656
TCF15	3.28099	0.515653	2.66e-05	0.000166254
CLEC2B	2.03833	4.92595	2.68e-05	0.000167435
MYOZ2	-2.03978	-2.61202	2.74e-05	0.000170462
ADAMTS20	3.52177	1.56415	2.77e-05	0.000171839
KCNQ2	-2.01127	-2.51601	2.81e-05	0.00017417
GPR148	-3.03372	-4.3298	2.82e-05	0.000174399
AMIGO2	2.05729	4.86151	2.84e-05	0.000175456
ALOX15	4.55372	2.30714	2.87e-05	0.000177041
SLCO4C1	4.08923	1.67041	2.88e-05	0.000177466
SORCS1	-2.23113	0.616759	2.89e-05	0.000178235
SMKR1	2.70117	0.39451	2.93e-05	0.000180072
C8A	-3.1338	-3.87383	2.95e-05	0.000180925
UNC13C	-2.46205	-1.82757	2.96e-05	0.000181655
DIRC1	3.59609	-2.76626	2.98e-05	0.000182703
SERPINE1	2.72567	8.44313	3.01e-05	0.000184731
IFI27	2.03738	8.41832	3.02e-05	0.000185059
HIST1H2AE	2.41348	1.68356	3.03e-05	0.000185459
STRIP2	2.00089	2.99809	3.04e-05	0.000185537
GJB4	2.67473	3.45041	3.12e-05	0.000190534
ACKR3	2.49898	6.7016	3.12e-05	0.000190534
AIM2	3.43393	3.67945	3.16e-05	0.000192447
CREG2	3.13456	2.79708	3.2e-05	0.000194724
POU3F3	-2.7512	-1.12196	3.24e-05	0.000196599
HIST1H1B	2.28082	-1.16711	3.3e-05	0.000199858
TRIM54	-2.41022	-0.689214	3.34e-05	0.000202014
EGFL6	2.13752	4.02279	3.37e-05	0.000203552
LKAAEAR1	3.09733	-1.70443	3.46e-05	0.000208372
FGF20	-2.44685	-3.48195	3.47e-05	0.000208463
R3HDML	-3.07376	-3.34573	3.52e-05	0.000211551
APOBEC4	-2.38682	-3.71572	3.56e-05	0.000213303
MYT1L	-2.19721	-2.91953	3.61e-05	0.000215762
HIST1H2BG	2.46874	1.85058	3.65e-05	0.000217866
CLUL1	-2.04587	-0.279861	3.66e-05	0.000218912
HKDC1	-2.39425	1.99429	3.68e-05	0.000219492
KISS1R	3.29126	-0.610517	3.68e-05	0.000219554
LYPD1	2.49192	0.734945	3.71e-05	0.000221004
LRIT2	4.07985	-2.93618	3.71e-05	0.000221004
DMRT3	4.12423	1.09331	3.88e-05	0.000229982
IFIT3	2.21807	5.86425	3.88e-05	0.000230116
DGKK	-3.15064	-2.78896	4.07e-05	0.000240186
HRASLS5	-2.33991	0.491379	4.2e-05	0.000246322
PLA2G2A	-2.70931	4.79013	4.21e-05	0.00024737
APOBEC3B	2.16023	3.73916	4.25e-05	0.000249186
HIST1H2BH	2.09173	0.930855	4.33e-05	0.000253582
COL5A2	2.14156	8.19724	4.34e-05	0.000254104
IP6K3	-2.10169	-0.208937	4.36e-05	0.00025494
CCL3	2.24093	1.22295	4.37e-05	0.000255616
GCOM1	-2.04829	0.673593	4.39e-05	0.000256638
MAGEA6	7.16276	3.70557	4.42e-05	0.000257762
SLITRK6	3.17903	4.5247	4.47e-05	0.000260733
GPR87	2.29355	5.38117	4.53e-05	0.000263941
SLC38A11	-2.15122	2.03334	4.65e-05	0.000270073
HIST1H2AJ	2.36534	-1.77954	4.67e-05	0.000271328
PRUNE2	-2.35012	6.05497	4.7e-05	0.000272703
ADAM23	3.16883	5.72961	4.72e-05	0.000273287
IL1A	3.70994	5.11512	4.75e-05	0.000274788
P2RX3	-2.12888	-3.28105	4.75e-05	0.000275128
RTL4	-2.69413	-4.58828	4.82e-05	0.000278393
SAA1	3.21909	4.71715	5.08e-05	0.000292266
ACP7	3.64512	2.29331	5.18e-05	0.000297084
METTL27	2.25147	1.89025	5.19e-05	0.000297604
COX6A2	-2.39889	-4.12249	5.23e-05	0.000299152
ROS1	4.37416	2.78983	5.28e-05	0.000301617
MTRNR2L5	-2.19696	-4.16135	5.31e-05	0.000303044
ZYG11A	2.2802	1.99331	5.31e-05	0.000303342
ST8SIA2	3.19693	0.929907	5.34e-05	0.000305079
HEPHL1	3.5052	5.19744	5.39e-05	0.000307684
NRAP	-2.41015	-2.63361	5.4e-05	0.000308021
ANO1	2.82863	8.94487	5.41e-05	0.000308295
CHD5	-2.28842	1.45684	5.43e-05	0.000309189
CNTN5	3.64368	1.27695	5.74e-05	0.000324134
CACNA1B	2.9975	2.67166	5.76e-05	0.000325186
SOX15	2.01218	6.26504	5.85e-05	0.000329875
IL24	2.45997	2.14756	5.93e-05	0.000333648
SYT14	2.88014	1.94486	6e-05	0.000337127
CYP4F2	-2.10242	-1.38472	6.26e-05	0.000350086
BARX1	-2.24911	2.80198	6.28e-05	0.00035128
GCLM	2.395	7.0854	6.29e-05	0.000351678
SERPINE2	2.26382	6.73771	6.31e-05	0.000352591
TRIM15	-2.32588	-0.278534	6.42e-05	0.000357543
ADGRG7	-2.87733	0.362021	6.47e-05	0.000359807
VAX2	2.28752	1.0167	6.47e-05	0.000359807
SMYD1	-2.50933	-1.5248	6.47e-05	0.000359807
KLHDC7B	3.96748	5.63389	6.48e-05	0.000360158
IGFL2	4.01857	2.57897	6.51e-05	0.000360983
NRSN1	-2.45684	-2.88861	6.51e-05	0.000361128
RSAD2	2.46615	5.12596	6.6e-05	0.000365639
DCSTAMP	3.37892	-1.05581	6.88e-05	0.000379791
RIPPLY3	2.70907	1.09158	6.91e-05	0.000380838
APOB	-2.02103	-0.91471	6.92e-05	0.000381194
CDHR1	2.8583	4.75719	6.93e-05	0.000381687
KCNG3	2.70214	0.366542	7.09e-05	0.000388531
MAGEA3	6.82632	4.11395	7.1e-05	0.000388758
SCNN1B	-2.06323	4.89817	7.1e-05	0.000388758
MAPK8IP2	2.15418	4.09229	7.19e-05	0.000393091
AMTN	4.63052	3.86729	7.3e-05	0.000398115
TNS4	2.19251	8.90905	7.47e-05	0.000406838
RGS20	2.4658	2.70868	7.81e-05	0.000424005
CARD17	3.20664	0.425872	7.82e-05	0.000424283
MAGEA4	6.80799	4.69681	7.85e-05	0.000425392
GABRB2	-2.20844	0.51459	7.88e-05	0.000426921
C17orf99	2.19958	-0.710557	7.95e-05	0.000430308
PTH2R	4.20161	1.80781	8.07e-05	0.000436256
MAGEA10	6.68342	1.83417	8.13e-05	0.000439168
MAGEA1	9.04743	2.75339	8.16e-05	0.000440388
DOC2A	2.48565	0.989936	8.34e-05	0.000448619
CHRNA1	2.63955	-0.33912	8.36e-05	0.00044911
TMPRSS15	-2.37233	-1.29281	8.39e-05	0.000450367
TACR2	-2.06409	2.98273	8.41e-05	0.000450634
SIX2	3.23833	3.14332	8.41e-05	0.000450634
CCL14	-2.27807	-0.564642	8.41e-05	0.000450634
SH2D5	3.10041	2.99467	8.61e-05	0.000460262
TNNI3	3.16817	-0.234543	8.81e-05	0.000470234
PPP1R14C	2.11534	5.70764	8.81e-05	0.000470293
POMC	3.67851	2.51653	8.88e-05	0.00047348
TBX15	2.43433	1.57232	9.01e-05	0.000479537
SULF1	2.1629	7.39456	9.16e-05	0.00048661
NPTX1	-2.0949	1.98511	9.26e-05	0.000491137
GPR152	-2.29671	-3.85886	9.46e-05	0.000499764
TRHDE	-2.27019	-0.11355	9.47e-05	0.000500377
SLC47A2	2.72279	3.01568	9.92e-05	0.000521547
CHRDL1	-2.40904	4.23126	0.000100982	0.000529717
PLN	-2.18662	4.15615	0.000104446	0.000546815
RDH16	2.25268	2.02815	0.00010695	0.000558521
CNN1	-2.0178	6.47294	0.000109053	0.000567922
P2RY6	2.12678	3.10796	0.000111088	0.000576917
COCH	3.81262	3.74243	0.00011365	0.000588755
HIST1H2BE	2.5875	-0.928943	0.000114364	0.000591475
GRIN3B	2.94013	1.83765	0.000114829	0.000593226
C1QTNF12	2.68442	2.82935	0.000117085	0.000602593
CXCL10	3.13972	5.47527	0.000119596	0.000613291
UCHL1	3.59028	6.85426	0.000119768	0.000613953
SYNPO2	-2.11055	7.68833	0.000126941	0.000645907
CCDC74B	2.06757	1.05155	0.000128631	0.000653541
MFSD2A	2.14993	5.18884	0.000129549	0.000657637
MAT1A	2.86082	0.00994643	0.000130196	0.000660051
GPR156	2.53185	1.20035	0.000134313	0.000677638
FBN2	3.15936	5.48494	0.000134402	0.000677904
MUC16	3.5687	3.97535	0.000136638	0.00068715
CLEC2L	3.35063	0.684382	0.000137297	0.000690091
HIST1H2BM	2.49939	-1.31003	0.000138177	0.000693817
CEL	3.73759	4.24465	0.000141702	0.000709355
COL3A1	2.14951	11.2462	0.000146897	0.000732834
FOXL2NB	3.56761	1.18298	0.000147417	0.000735046
UGT1A1	-2.21417	-1.03445	0.000148438	0.00073896
ACKR1	-2.08654	3.72658	0.000148562	0.000739377
SLCO6A1	2.88624	-1.30644	0.000149009	0.000741046
B4GALNT4	2.40703	4.21747	0.000149197	0.000741751
DMP1	2.3562	0.278857	0.00015048	0.00074744
PAX4	-3.06794	-3.78031	0.000151805	0.000752523
UGT2B7	-2.31622	-2.20742	0.000156919	0.000775003
GBX2	2.74994	-0.791976	0.000162252	0.000798791
GOLGA7B	2.41508	4.16968	0.000162289	0.000798791
HIST2H2AA3	2.25511	-1.61482	0.000164401	0.000807914
DMRT2	3.52374	2.83922	0.000166861	0.000818931
ANKRD18B	2.45997	2.89889	0.000168344	0.000825341
FADS2	2.0294	6.25506	0.000171527	0.000837879
LCE1E	3.68671	-3.37185	0.000172291	0.000841394
OTX2	7.33224	-0.609485	0.000182185	0.000885328
PSG5	4.56459	-0.642261	0.000183619	0.000891184
TFPI2	3.53633	3.60257	0.00018716	0.000907192
WNT7B	2.20252	6.63765	0.000189503	0.000917091
PALM2	2.2765	0.284822	0.000190397	0.000920465
CECR2	2.59635	3.4498	0.000190693	0.000921421
SCUBE1	-2.15752	3.57701	0.000197934	0.000950284
CST4	2.98739	-1.65075	0.000200926	0.00096317
CNR1	-2.00915	0.980966	0.000201047	0.000963504
LAMA1	3.13256	4.53762	0.000206745	0.000986356
PRR20G	6.11956	0.271229	0.000207411	0.000988695
KCNA2	-2.29722	-0.488874	0.000208383	0.000992573
PKHD1	-2.1336	0.980949	0.000208498	0.000992867
GRM4	2.58933	0.839676	0.000212095	0.00100718
TESMIN	2.93485	4.28807	0.000213317	0.00101221
SEMA5B	2.29348	2.15816	0.000217183	0.00102848
BAMBI	2.09	3.70065	0.000219002	0.00103631
TCHHL1	4.46254	-1.37756	0.000222603	0.00105126
TGM7	-2.41737	-2.75841	0.000228209	0.00107337
HSPA6	2.92541	4.38304	0.00022961	0.00107861
ARTN	2.2495	4.15969	0.000230964	0.00108416
CFHR4	3.5838	-1.53213	0.000234215	0.00109859
COL5A1	2.0729	8.99939	0.000238542	0.00111442
UCN3	-2.33875	-3.79392	0.000240915	0.00112343
IL36G	3.52639	4.8993	0.000246128	0.00114473
TRIM10	-2.06377	-2.03646	0.000246491	0.00114585
LMOD1	-2.00771	6.35139	0.000247228	0.00114871
CXCL5	3.30789	3.35574	0.000249742	0.00115838
UTS2	3.49344	-0.47115	0.000251735	0.00116618
SLC13A5	3.86018	3.20527	0.000264046	0.0012151
CD177	3.97371	3.81642	0.000264681	0.00121773
PSG9	3.88379	-2.96876	0.000276789	0.0012666
CLCA2	2.45882	8.97279	0.000277327	0.00126875
HOXD12	2.39873	-2.96592	0.000278124	0.00127177
KRT37	3.02929	-1.74098	0.000280539	0.00128137
G6PC	-2.14374	-3.17292	0.000284766	0.00129882
EFCAB1	2.29686	1.14853	0.00028524	0.00130051
BCAT1	2.20843	6.2243	0.00028931	0.00131714
FOLR3	3.78893	-0.0482133	0.000292276	0.00132806
GTSF1	4.3721	3.06257	0.000292722	0.00132912
CST2	2.62503	-0.0282614	0.000293061	0.00133009
IRX6	3.18231	2.05407	0.00029612	0.00134066
FNDC1	2.30391	4.69224	0.000296854	0.00134268
IGFBP3	2.01941	7.93147	0.000297403	0.00134484
CGB8	4.45537	-2.83507	0.000300354	0.00135557
SDK2	2.09922	5.19565	0.000301101	0.00135796
SLCO1B1	3.41684	-1.43388	0.000301512	0.00135949
ODC1	2.08846	8.64917	0.000312357	0.00140332
EPO	3.1232	0.725965	0.000313591	0.00140819
MS4A18	-2.67747	-4.35158	0.000324008	0.0014508
IL13RA2	3.15809	0.937433	0.000331567	0.00148108
LMO1	2.88122	0.340248	0.000331718	0.00148108
CXCL14	2.22551	8.66205	0.000333889	0.00149042
ARPP21	-2.51923	-3.24953	0.000334772	0.00149401
QRFPR	3.70228	2.535	0.000337598	0.00150375
FGF19	6.05007	4.73129	0.00033984	0.00151224
EGR2	2.12154	4.36197	0.000341345	0.0015172
RGR	-2.38302	-3.63037	0.000347011	0.00153722
C9	3.32979	-0.468371	0.000347063	0.00153722
TEX35	-2.0592	-2.55935	0.000347066	0.00153722
ELOVL3	2.54236	-0.949549	0.000347071	0.00153722
PHF24	2.72151	2.02134	0.000347777	0.00153958
ZNF474	2.20548	0.110777	0.000351908	0.00155448
FAM83A	2.90788	7.78326	0.000361653	0.00159124
CHODL	2.47296	2.71335	0.000366249	0.00160957
BTG4	2.56038	-2.88923	0.000375194	0.00164387
COL1A2	2.00285	11.2547	0.000376358	0.00164821
KRTAP19-1	7.09188	-1.21016	0.000389429	0.00169949
TNFSF9	2.00015	2.92372	0.00039719	0.00172893
NKX1-2	3.10743	2.31269	0.000399713	0.00173871
SPHKAP	-2.26505	-2.69437	0.000401469	0.00174513
LRRC15	2.68606	4.61746	0.000403173	0.00175091
UCP1	2.85495	-3.51643	0.000410188	0.00177693
GAST	3.29486	0.676715	0.00041173	0.00178188
TLX3	5.62985	0.852404	0.000411976	0.00178217
ZG16	-2.23257	-3.09988	0.00041371	0.00178921
GFY	2.36203	-3.51092	0.000423167	0.00182338
ALX4	3.81861	1.79859	0.000424816	0.00182964
GP9	-2.17376	-4.4494	0.000425727	0.00183315
SLC28A3	2.25872	4.18121	0.000426834	0.00183707
UBE2U	-2.49165	-1.5266	0.000429546	0.00184662
PPBP	5.11771	0.905297	0.000440144	0.00188397
SLC5A12	2.20035	2.44133	0.000441322	0.00188859
GATA3	2.0387	2.71689	0.000445593	0.00190469
ADAMDEC1	2.10592	2.27621	0.000448107	0.001915
NIPAL4	2.35947	5.4259	0.000449205	0.00191882
MAGEA9B	6.17609	0.0274809	0.000452278	0.00193062
NKX2-8	2.79615	1.47416	0.000455605	0.00194217
SPRR4	3.91735	2.98128	0.000457018	0.00194608
TG	2.57957	1.61847	0.0004572	0.00194632
DNAH17	2.12543	5.71873	0.000457536	0.00194686
PCDHGC5	2.63915	2.37233	0.000460052	0.00195535
CASP14	5.88717	5.925	0.000466711	0.00198006
FGF11	2.01929	1.39272	0.000469645	0.00199071
MAGEB6	5.36203	-2.87721	0.000480225	0.00203188
HES2	2.21622	6.09266	0.000484173	0.00204627
ANKUB1	2.19036	-0.563152	0.000484592	0.00204759
KLK4	2.57272	-0.981757	0.000492454	0.00207612
MAGED4B	2.10851	-2.4679	0.000498389	0.00209926
TGFBR3L	2.31024	0.758214	0.0004991	0.00210178
TMSB15A	2.62799	-0.360423	0.000509301	0.00214041
C10orf120	-2.17883	-4.18144	0.000512347	0.00215177
MMD2	-2.44868	-3.46114	0.00051714	0.00216607
TCN1	-2.15611	3.72151	0.000520022	0.0021762
DSC3	2.06056	9.82713	0.00052208	0.00218286
MC2R	-2.23596	-4.32245	0.000522762	0.00218522
HIST1H2AB	2.60245	-3.69051	0.000532885	0.0022216
NUDT11	2.05022	2.92958	0.000542268	0.0022552
RXFP3	3.04375	-3.56279	0.000552121	0.00229109
PLEKHS1	-2.15126	2.45641	0.000552315	0.00229139
CD70	2.87624	1.88428	0.000556042	0.00230533
CFHR3	2.24269	-0.180312	0.000560505	0.00232177
KRT86	2.3586	1.22032	0.000575802	0.00237883
CYP26B1	2.27358	4.26107	0.000579066	0.00238958
PLEKHG4B	2.20615	4.09756	0.000593677	0.00243955
GSC2	2.82381	-3.35483	0.000594724	0.00244194
TP53AIP1	2.35544	3.71374	0.000599911	0.00245785
SPACA3	-2.11114	-4.08909	0.000601168	0.00246192
BNC1	2.18809	6.79558	0.000607513	0.0024852
TMEM105	2.23308	0.209403	0.00060779	0.00248579
TMEM270	2.49773	-1.40117	0.00060875	0.00248877
KRTAP5-4	-2.16309	-3.734	0.000635437	0.00257861
INHA	3.09126	1.36881	0.000640653	0.00259753
CCL3L1	2.02905	0.242449	0.000667859	0.00269385
TMEM155	3.5077	-0.169618	0.000688504	0.0027676
GLB1L3	3.24777	0.901739	0.000691814	0.00277911
CLDN24	2.611	-2.38266	0.000702139	0.00281215
NR1H4	-2.14623	-3.21994	0.000708916	0.00283687
NKX3-2	2.02104	-0.119667	0.000715119	0.00285499
CLEC12A	2.03882	1.22606	0.00071542	0.00285559
SHISA2	3.14009	4.72277	0.000716445	0.00285907
DLX2	2.591	1.76542	0.00072554	0.00289229
LRAT	3.17769	3.7395	0.000743476	0.00295812
HTR7	2.27069	2.4131	0.000762672	0.00302808
WT1	2.95249	-0.6344	0.00076726	0.00304294
LYPD8	4.13225	-0.397286	0.000785598	0.00310535
LOXL4	2.63045	4.56653	0.000795625	0.00313567
OR11H6	3.91795	-3.8274	0.0007963	0.00313701
KRT34	2.79838	0.124301	0.000803896	0.00316228
TSHB	-2.17158	-4.24856	0.000804206	0.00316284
EDN3	-2.45968	0.431988	0.000832768	0.00325672
SLC6A2	2.58717	1.67882	0.000840515	0.00328086
HRG	2.55714	-1.29816	0.000850217	0.0033139
NKX2-1	3.39507	-1.83314	0.000850598	0.0033147
CHRNA9	4.40102	0.781403	0.000850933	0.00331513
SOX2	2.39018	6.69416	0.00088338	0.00341829
GYS2	-2.51403	1.69485	0.000887853	0.00343347
AKR1C8P	2.71153	-2.6258	0.000912359	0.00351447
ACTL8	4.21668	0.934259	0.000927452	0.00356382
CLEC12B	2.61337	-1.19175	0.00100161	0.00381207
MOGAT2	-2.26679	0.670992	0.00101599	0.00385973
SAGE1	6.5834	1.26611	0.00101885	0.00386904
SCN7A	-2.02262	2.83218	0.00101925	0.00386977
ADGRD2	2.07907	-0.308153	0.00102554	0.00389209
RHAG	-2.34759	-3.82476	0.00103621	0.003927
CCL8	2.32626	1.01916	0.00103693	0.00392814
PAX3	3.94351	-0.106517	0.00104311	0.00394915
HIST1H3C	2.00562	-1.90925	0.00104791	0.00396654
SYT10	-2.0012	-2.45492	0.00105368	0.00398514
TP53TG3D	2.63919	-1.70754	0.00105925	0.00400217
KRT5	2.12593	12.7037	0.00105995	0.00400401
CDH26	2.23639	3.11042	0.00110118	0.00413726
POU4F1	3.27204	-0.238481	0.00113574	0.00424584
MAP7D2	-2.00134	3.27107	0.00113807	0.00425286
KRTAP2-3	4.64821	-1.83878	0.00114806	0.00428676
KHDC1L	3.39597	0.710004	0.00115168	0.00429858
LCE2D	5.59308	-3.44092	0.00115777	0.00431788
LY6K	2.14116	3.90382	0.00117522	0.00436902
THEG	2.94117	-0.612902	0.0011985	0.00444237
COL22A1	2.59587	3.30288	0.00120276	0.00445551
PITX3	2.0674	-1.86794	0.00121078	0.00448167
FAM133A	5.0284	1.5173	0.00121189	0.00448404
SERPINB7	2.94139	4.01028	0.00121304	0.00448738
FAM19A5	2.04829	2.40335	0.00122964	0.0045336
TNF	2.45581	1.79986	0.00123976	0.00456552
AC020922.1	2.97651	-2.23136	0.00128099	0.00470166
LEMD1	2.07819	1.54322	0.00128293	0.00470785
PRDM13	2.63419	-0.819225	0.00128717	0.00472154
CTAG2	7.96509	2.73869	0.00129077	0.00473104
MAGEC1	8.61546	1.46591	0.001304	0.00476743
GJD2	-2.06173	-3.12337	0.00138439	0.00502898
KRT82	2.76765	-2.73287	0.00138917	0.00504242
HMX1	4.23515	0.27873	0.00139695	0.00506676
KHDC3L	-2.06907	-3.58016	0.00141769	0.00512709
DSC1	3.62202	4.09283	0.00144325	0.00521049
APOA4	-2.61297	-4.18701	0.00145655	0.00525042
CCDC144NL	4.30987	-0.626373	0.00145972	0.00525778
HMGA2	2.45784	4.9919	0.0014601	0.00525816
LCE2A	4.98764	-3.17836	0.00147692	0.0053075
FAM181B	2.53058	1.64415	0.00149279	0.00534916
SPANXC	8.66861	0.34409	0.00151384	0.00541425
CXCL9	2.46194	5.96478	0.00152294	0.00544263
AJAP1	2.69424	2.65902	0.00153023	0.0054666
ZIC1	3.54544	2.19937	0.00153326	0.00547325
ENTHD1	2.44088	-0.833562	0.00153626	0.00548294
GNG4	2.11845	4.03495	0.00156337	0.00556589
KLF14	2.51962	-0.577927	0.00156381	0.00556643
SLCO1A2	2.38545	2.78096	0.00157021	0.00558813
VNN3	2.73923	1.1813	0.00159502	0.00566462
SPINK8	-2.32952	-2.43445	0.00160805	0.00570225
SIGLEC12	2.06555	1.04638	0.00163228	0.00577505
PADI3	2.95915	4.72816	0.00164095	0.00580184
TBX4	2.31	0.254928	0.00165127	0.00582902
SEMG1	-2.26701	-3.54607	0.00165198	0.00583046
GLDC	2.51802	2.81603	0.00165768	0.00584725
FCN2	-2.19305	-4.50299	0.00166367	0.00586617
FABP9	3.47037	-2.80032	0.0016661	0.00587255
LMX1B	2.17843	2.3089	0.00173167	0.00607285
MAGEC2	9.12287	0.583007	0.00175881	0.00615536
CD200R1L	2.12744	-1.6242	0.00176021	0.0061591
TREML4	2.45913	-2.62527	0.00179869	0.00626103
TMEM52B	2.71369	1.36631	0.001827	0.00635132
CLLU1OS	3.33468	-3.1602	0.00183322	0.0063694
PCDHGB1	2.15721	1.58935	0.0018628	0.00645542
XKR5	2.5009	-0.423015	0.00187151	0.00647961
C19orf84	2.39565	-1.05868	0.00188444	0.00651534
IDO1	2.76563	4.7784	0.00192223	0.00662585
SAA2	2.54456	2.14831	0.00192705	0.00663756
PAX7	4.79465	1.96566	0.00192974	0.00664561
KCNG1	2.20733	3.50039	0.00194508	0.0066923
CSAG1	4.89077	2.14244	0.00194714	0.00669694
ADD2	2.24361	3.7224	0.00198847	0.00681408
NKX2-4	4.87188	-2.51955	0.0020085	0.00687269
CHIT1	2.95491	2.44207	0.00201215	0.00688266
MUC22	-2.37511	1.87561	0.00201884	0.00690176
SPANXB1	7.18515	0.702145	0.00206348	0.00703639
SAA2-SAA4	3.03785	-0.63533	0.00206637	0.00704369
DEFB4A	4.05971	2.06549	0.00207196	0.00705761
SLC35F3	2.12886	2.33352	0.00209285	0.00711584
LHX8	3.80902	0.474417	0.00216443	0.00732337
VCX3A	4.50004	-2.51188	0.00216921	0.0073382
IL19	3.28602	-0.118796	0.00219463	0.00741215
ANKK1	2.08475	0.937425	0.002215	0.00747155
NGF	2.02487	0.315249	0.00226961	0.00763376
MESP2	2.46079	0.159419	0.0023837	0.00796324
ZNF280A	4.17613	-2.03187	0.0023843	0.00796382
CT45A10	6.10117	-0.358305	0.00240513	0.00802481
CLDN6	3.0619	-0.978373	0.00241445	0.00805304
SERPINA9	3.55442	-1.1774	0.00246712	0.00820781
CTAGE15	2.6847	-0.778691	0.00250193	0.00830934
OR1F1	2.40202	-2.88583	0.00252668	0.00837224
MEGF10	2.04889	1.32062	0.00254805	0.00842589
JAKMIP2	2.54583	1.96611	0.00254882	0.00842606
SOX1	3.46567	-0.104452	0.00255243	0.00843317
MLIP	2.09565	1.58716	0.00259819	0.00855928
LCE3D	4.1267	5.08494	0.00261057	0.00859554
ANKRD30B	-2.01609	-2.75318	0.00262563	0.00863575
PNLDC1	3.0073	1.58557	0.00264293	0.00868531
MAGEB2	6.01409	2.13826	0.0026457	0.00869136
MAEL	3.9173	1.38541	0.00266624	0.0087481
PLPPR3	2.10828	-1.68428	0.00272697	0.00892707
CCDC185	2.03738	-2.17201	0.00280586	0.00914381
IRX4	2.08891	5.31596	0.00282053	0.0091868
S100A12	3.11914	5.28565	0.00282234	0.00919112
GPR32	-2.12718	-3.86186	0.0028419	0.00924678
TMCO5A	-2.16175	-3.23975	0.00287011	0.00933048
IGFL4	2.41278	0.922587	0.00290043	0.00941559
HDGFL1	4.23436	-2.6147	0.00291449	0.00945017
SIX3	2.86984	0.165531	0.00292328	0.00947702
CLEC1B	2.12905	-2.03692	0.00294942	0.00954856
RPE65	3.55713	1.24638	0.00297274	0.00961245
PRR9	4.41495	1.8605	0.00305952	0.00984381
PLA2G4E	2.70713	5.50117	0.00306133	0.00984794
AC010255.3	2.15423	-3.45995	0.00325632	0.0103843
MAGEA9	6.19037	-2.17916	0.00331683	0.0105343
AC011604.2	3.02729	-3.24079	0.00341074	0.0108051
SLC5A7	-2.23042	-0.219801	0.00344177	0.0108997
LUZP2	2.14728	1.00004	0.00352285	0.0111264
SFRP4	2.42771	4.98398	0.0035306	0.0111434
FAM237A	3.10772	-3.62002	0.00354386	0.011174
RNF182	2.76645	0.972253	0.00355855	0.0112146
HTR2C	2.82466	0.764704	0.00359898	0.0113249
OPRK1	3.15511	-0.345484	0.00363707	0.0114255
STRA8	3.47146	-0.90991	0.00366377	0.0114959
RTP3	3.5132	-1.56084	0.00372917	0.0116686
ELFN2	2.42837	0.933766	0.0037715	0.0117807
MPP4	2.00767	-0.34936	0.00383425	0.0119489
OTP	2.3555	-2.75112	0.0039118	0.0121542
ADGRE1	2.15903	0.725308	0.00392668	0.0121944
DEFB132	-2.35843	-4.52457	0.00395053	0.0122542
KCNS1	2.13399	0.0551077	0.00397223	0.0123154
ZFP42	3.71954	-0.319714	0.00409568	0.0126417
NR0B1	5.76565	1.43743	0.00410914	0.0126728
PAGE2B	2.62166	-4.3046	0.00416928	0.0128351
LPA	2.20999	-1.43571	0.00420217	0.0129248
ABCA4	3.33352	4.24678	0.00424687	0.0130247
KRT83	3.35215	-2.55149	0.00430935	0.0131948
KRT77	2.8797	0.656833	0.00436013	0.0133285
FRG2	3.00658	-3.789	0.00440282	0.0134371
TARM1	-2.09029	-3.66999	0.00446775	0.0136175
TKTL1	5.33432	2.33026	0.00454532	0.0138247
H2BFM	2.73992	-2.40806	0.00455017	0.0138328
ANKRD34B	2.58147	-0.108105	0.00455994	0.0138512
NTRK2	2.46243	8.04126	0.00456148	0.0138518
VWDE	2.71691	1.0806	0.00468403	0.0141685
UPK1A	-2.05801	2.34992	0.00473646	0.014304
CT45A1	6.56127	-0.132193	0.00477619	0.0144147
NEFM	2.8925	3.0449	0.00481108	0.0145037
OR7A5	2.6614	-1.55104	0.00483341	0.0145616
ASB5	-2.10631	1.78558	0.00488434	0.014689
GLYATL1B	2.6442	-3.67469	0.00502542	0.0150626
GCG	-2.32717	-3.48048	0.00514267	0.0153698
NETO1	2.20032	0.443915	0.00521901	0.0155781
SPANXD	7.48599	0.571392	0.00532457	0.0158452
TEX19	2.08326	-3.43235	0.00534018	0.0158841
EPHA8	2.32762	-1.55694	0.00541199	0.0160671
RNF17	3.07845	-0.784651	0.00547844	0.0162233
LUZP4	4.31462	-2.76669	0.00558166	0.0164847
FAM178B	2.35129	1.87063	0.00559192	0.0165098
KRT14	2.44021	12.0121	0.00561829	0.0165772
VCX2	4.44775	-3.61304	0.00565414	0.0166647
OBP2A	2.20939	-2.49058	0.00572582	0.0168204
CST9	2.56404	-3.90038	0.00572856	0.0168258
PF4V1	2.00877	-3.20091	0.00592126	0.0173025
SFTA2	-2.0773	0.319563	0.00595705	0.0173744
KRTAP5-6	2.20006	-4.17457	0.0060849	0.0176978
CALB1	3.56417	5.26992	0.00608929	0.0177078
LRRC38	2.28587	0.0975567	0.00617257	0.0179094
UGT2A1	3.25161	-1.80667	0.00623347	0.0180487
MAL	-2.0966	7.51395	0.00657394	0.0188886
SPRR2G	3.33373	5.01834	0.00669354	0.0191911
UGT1A8	-2.19055	-1.49322	0.00670796	0.0192265
SOHLH1	4.82987	-0.256795	0.00691634	0.0197406
VCX	2.63081	-1.69019	0.00705496	0.0200831
MSGN1	2.13996	-3.31608	0.00710951	0.0202198
CYP4F11	2.56144	7.07564	0.00716035	0.0203305
C10orf90	2.33853	-1.30353	0.0072306	0.0204927
SPINK7	-2.07213	4.88006	0.00723615	0.0204991
MMP8	2.25199	-1.45797	0.00730803	0.0206715
CT45A5	5.78849	-3.25774	0.00742991	0.020933
CCDC194	2.08696	-1.93863	0.00745091	0.0209796
C6orf15	3.6278	3.48996	0.00749222	0.0210844
DSCAM	2.47893	-0.0563779	0.0076431	0.0214639
SLC6A14	2.37357	4.5218	0.00774506	0.0216982
MYOD1	3.15755	-4.04702	0.00791043	0.0220527
WFDC12	2.93035	1.51258	0.00797434	0.0221979
FABP4	3.31539	6.23702	0.00803884	0.0223542
SPAG11A	-2.15942	-4.28601	0.00812592	0.0225562
SERPINA12	3.43072	-1.94671	0.0082775	0.0229125
SLC22A25	2.3304	-2.06108	0.00831064	0.0229805
IGFN1	2.59021	1.19837	0.00837371	0.0231276
SLC35G4	-2.14039	-4.55178	0.00842766	0.0232355
IL36B	2.69915	1.43469	0.00846748	0.0233179
PCDH19	2.07015	4.08531	0.0084809	0.0233446
HOXC12	3.29	0.494896	0.0084869	0.0233577
CYP26A1	3.26273	3.07237	0.00858761	0.0235967
BRDT	3.47762	1.6416	0.00874442	0.0239511
MYO3A	2.3541	1.98818	0.00877074	0.024019
KRT4	-2.32768	11.2218	0.00894708	0.0244163
CACNG4	2.07482	2.89492	0.00905302	0.024648
MAGEA12	5.21942	2.25856	0.00909504	0.0247444
AC011473.4	2.32779	2.85571	0.00934085	0.0253213
FOXE1	2.03111	6.86481	0.00950809	0.0257078
LYZL4	-2.07312	-4.44109	0.00985321	0.0264805
SOHLH2	2.8283	-0.00975232	0.00986863	0.0265143
NHLH2	2.29863	1.4421	0.00994895	0.0267072
CLDN10	2.66845	2.29606	0.00998732	0.0267872
MYCL	2.43821	7.092	0.0101636	0.0271744
PAGE2	5.97391	0.125093	0.010391	0.0276995
DCC	3.05716	2.48349	0.0104852	0.0279013
[truncated: 65 more rows]
