# Supplementary material for: Genome-wide analysis of lncRNAs, miRNAs, and mRNAs forming a prognostic scoring system in esophageal squamous cell carcinoma
Source: PeerJ. 2020 Feb 10;8:e8368. doi: 10.7717/peerj.8368 (PMC7017795; doi:10.7717/peerj.8368)
Supplement: Table S2 [file peerj-08-8368-s003.xlsx]

## Sheet: lncRNA
Univariate Cox regression analysis results of lncRNA of the remaining 80 ESCC samples
lncRNAname	HR	P
MLIP	1.75075	4.81e-05
MLIP-IT1	2.03542	0.000920641
LINC01068	1.59145	0.00189049
ANG	1.74305	0.00261543
AC008443.3	0.731056	0.00273206
AL160408.5	1.54384	0.00316404
CDCA2	0.508863	0.00329135
LINC00601	1.42613	0.00477816
TTTY14	1.30748	0.00478418
AL033384.1	1.46006	0.00490274
AC084262.1	0.48151	0.00619646
LINC01415	0.675597	0.00691814
SIK2	0.316924	0.00774246
LINC00543	1.34323	0.0100999
LINC00392	1.15805	0.0102667
CTSC	1.60285	0.0104996
ARSD	2.51545	0.0106307
SLC40A1	1.73697	0.0108507
LINC00898	0.752655	0.011864
LINC01602	0.623435	0.0130007
AL160408.4	1.39108	0.0135647
LINC01228	1.26782	0.0138618
BCAT1	0.718275	0.0141862
AL513123.1	1.65974	0.0150061
CYP17A1	1.4512	0.0153051
C19orf81	1.28207	0.0158996
AC009407.1	1.69165	0.0162177
C15orf65	1.89155	0.0163796
NCF2	1.6178	0.0167294
HGD	1.30039	0.0169323
HCN1	0.700225	0.017073
GFRA2	1.42224	0.0195319
FAM72B	0.640208	0.0205841
CYFIP2	1.29345	0.0221967
LINC00967	1.64442	0.022712
LINC01460	0.792198	0.0230712
AC022031.2	0.798407	0.0286925
AL356234.2	1.27171	0.0296242
CLMN	0.604194	0.030387
AC078788.1	1.37001	0.030407
ICAM5	0.770384	0.0305463
MEX3A	0.728105	0.0330037
POU6F2	0.853141	0.0334837
TMEM220	0.68049	0.0343031
CCNYL2	0.846204	0.0362262
BUB1	0.644944	0.0372259
PDIA2	0.762596	0.0376945
GPR160	1.38154	0.0385129
ENPP3	0.770238	0.03864
FABP3	1.50294	0.0387828
AL160408.1	1.39966	0.0389056
NECTIN3	0.706302	0.0443281
LINC-ROR	1.51324	0.0459972
TSSC2	0.501281	0.0467627
GABRA3	0.82038	0.0470843
MTBP	0.566911	0.0473125
CENPE	0.63653	0.0473143
SMPD4P1	0.832773	0.047662
AC126768.1	0.788398	0.0489463
AC010595.1	0.826767	0.0492887
IL33	1.19803	0.0497779
AC008163.1	1.23996	0.0499067
TMEM155	1.19182	0.0505808
LINC01393	1.3662	0.0512514
TMEM125	1.30721	0.0513349
LINC01597	1.30667	0.0518488
COX6B2	0.763492	0.0526844
CIP2A	0.688871	0.0533796
AC112178.1	0.77682	0.054623
NETO1	0.82865	0.054844
GTSF1	0.8899	0.0551737
SLC47A1P2	0.798753	0.0552914
HABP2	1.33669	0.0553304
AL137246.1	0.614543	0.0556636
AC087612.1	0.873636	0.0557477
LINC00942	1.11827	0.0558523
ELDR	0.752551	0.0575597
STC2	1.33017	0.0579284
C20orf197	0.788953	0.0579751
AC092484.1	1.18346	0.0580123
IGFBP3	1.28616	0.0589416
GPRC5C	1.33733	0.0592299
PTPRN	0.799709	0.0604013
TCAM1P	1.19503	0.0605483
TRIP13	0.683328	0.0606051
AP000561.1	0.637834	0.0607717
CPM	1.44576	0.0610538
LINC01479	1.5324	0.0615117
RECQL4	0.58304	0.0624033
AC103746.1	0.667167	0.0646477
BMS1P22	0.792208	0.0647135
LINC02029	1.34271	0.0657052
LINC01419	0.750952	0.0659417
AL117329.1	0.76217	0.0662239
PLUT	1.37781	0.0674923
LINC00504	1.1875	0.0678931
LINC00261	0.773382	0.0695063
KIF23	0.647396	0.0699906
AC009271.1	0.828887	0.0710678
ISL1	0.846256	0.0739653
Z94160.1	0.564981	0.0758038
MLPH	1.22158	0.0758497
PICSAR	0.884056	0.0767587
GOLT1A	1.2341	0.0773302
FAM174B	1.37073	0.0773398
AL118508.2	1.2602	0.0774529
PCDH9	0.826031	0.0793115
PDE1B	1.37721	0.0804136
AC091043.1	1.68564	0.080568
AC105460.1	0.903589	0.0815002
LOXL2	0.721047	0.0817484
AC126768.2	0.801129	0.0822602
LINC02417	0.698441	0.0857576
TMEM139	0.790821	0.0861953
SFTA1P	0.801875	0.087682
AC008080.4	0.723219	0.0878536
BUB1B	0.679017	0.0881705
CDC45	0.673376	0.0884915
GBP1P1	1.45983	0.0890512
AC008708.1	0.788549	0.0892946
LINC00941	0.854312	0.0941611
CHRFAM7A	1.29133	0.0950395
TPRXL	1.22763	0.0951448
AC012213.4	1.22076	0.0951913
SLC26A7	0.816598	0.0960923
CD86	1.49887	0.0979045
AC026782.2	1.28734	0.0980029
LINC01446	0.874088	0.0985864
INHBA	0.814224	0.0991001
LINC02457	0.842615	0.0997056
HNMT	1.41618	0.100014
AC034154.1	0.785594	0.100196
LINC02109	0.848216	0.100505
LINC01385	0.747182	0.101463
PAX3	0.879867	0.101599
PPFIA2	0.818777	0.102508
SMKR1	1.19365	0.102547
HRG	1.21672	0.102576
FBN2	0.866178	0.102729
AC124657.1	0.644223	0.10338
AC025244.1	1.22069	0.103491
LGALS17A	1.13646	0.104609
AL118508.1	1.15808	0.105674
XRCC2	0.755247	0.106049
HS6ST2	0.880711	0.106249
AL355607.2	1.19204	0.107586
LNCAROD	0.874849	0.108529
ST8SIA3	0.641845	0.109666
AL359513.1	1.46002	0.109758
NSG2	1.26794	0.109921
AC006305.1	0.811577	0.110472
LAMA2	0.749915	0.111559
PROM1	0.876299	0.112066
TKTL1	1.12022	0.113637
TMEM238L	1.18151	0.114171
DDIAS	0.744604	0.114242
AC100801.1	1.12299	0.114327
LINC01925	0.820334	0.117599
AC024940.1	0.845391	0.120049
LINC00184	1.23246	0.120144
HIST2H2BB	1.25032	0.121358
FCGR3A	1.25958	0.122352
AP001547.1	1.17097	0.123037
MED15P9	0.853453	0.123434
LINC01698	1.26004	0.124654
SGSM1	1.19703	0.125062
ANLN	0.764836	0.126516
ERVE-1	1.23209	0.127017
SNHG27	0.823365	0.127123
LINC00839	0.855497	0.129105
AC010998.3	1.16909	0.129416
RHOXF1P1	1.21886	0.129508
LINC02157	0.651278	0.129823
LINC00626	0.859598	0.130316
RGN	1.26046	0.130579
AC087477.2	0.762555	0.132615
AC015845.2	0.710833	0.133801
ZBED3	0.729081	0.133993
AC096751.2	0.755542	0.135358
LINC00540	0.901087	0.135725
BLACAT1	0.831857	0.136937
AC106799.3	1.15629	0.13755
AC110741.1	1.37265	0.138098
AC018716.2	1.15973	0.1382
FAR2P1	0.901389	0.138974
ARHGEF38	1.30178	0.139053
IL13RA2	0.850756	0.13925
SMIM11A	0.692726	0.14008
AL445426.1	0.742626	0.14045
PRAME	0.909277	0.140695
ABCC12	0.732132	0.141281
LINC01873	1.27018	0.142017
LINC00656	1.19796	0.142039
BEND6	0.785212	0.142237
AC108174.1	0.851458	0.142985
GRIA4	0.829556	0.143075
CKAP2L	0.720261	0.143637
SUGCT	0.794554	0.144474
AC021683.3	0.845581	0.145415
ARHGDIG	0.833102	0.145981
RHPN2	0.741978	0.147075
AC005863.1	0.849394	0.147279
AC021218.1	0.794625	0.147774
AL135999.3	0.713335	0.148166
CCDC144NL	0.887988	0.14863
AC087855.2	0.608423	0.151541
NMRAL2P	1.11469	0.151593
AC090044.1	0.787178	0.152496
CHRNA7	1.18213	0.152917
AC007637.1	1.27123	0.153506
TESC	1.29195	0.153644
AC239799.2	1.223	0.154237
RAP1GAP	1.2944	0.154328
HID1	1.26441	0.15439
AL162408.1	0.714937	0.154647
AC100823.1	0.819991	0.15492
NIPAL4	1.16221	0.155047
SEMA3B	0.815543	0.155823
RHAG	0.751473	0.155947
LINC00592	1.29877	0.156063
Z82198.1	1.45277	0.157867
RAB17	1.18271	0.158215
CHRNA1	0.824006	0.158692
ADH4	0.787432	0.158883
LINC01844	0.815066	0.159144
AC012409.2	0.70459	0.159846
MUC2	0.888745	0.162936
PDE2A	1.26738	0.163226
C9orf152	1.1777	0.16364
GABRD	1.27338	0.163647
ABCA4	1.09675	0.164727
AC087477.5	0.701124	0.165002
LINC00519	1.16189	0.166231
AC015660.1	1.15587	0.1666
DEPDC1B	0.712888	0.169626
ACSL5	1.18435	0.169725
AC092167.1	0.79463	0.169772
HIST2H2BA	1.21371	0.170518
C1QTNF6	0.809314	0.170554
NEK2	0.716203	0.173193
CENPF	0.778872	0.173451
AC111149.2	1.09	0.173575
KCNQ1	1.31864	0.17369
GBP1	1.19084	0.173711
TG	1.16347	0.174018
ERP27	0.840835	0.174019
AC018716.1	1.15839	0.174113
ANKUB1	0.79316	0.174406
LINC00628	1.31345	0.174457
AC109454.3	1.13473	0.175842
AC100826.1	0.641997	0.176068
FAM238B	0.789091	0.176153
IRX4	0.893913	0.176904
IRX6	1.10567	0.17696
ANKRD40CL	0.801077	0.178506
POLQ	0.768192	0.178766
MUCL1	1.08364	0.180699
AR	0.78579	0.181129
AC091544.4	1.16453	0.182751
AC024337.2	0.808251	0.1828
GPR176	0.831596	0.183094
G6PC2	0.738399	0.18379
LINC01996	0.74694	0.18382
LINC01829	1.21577	0.184251
SLC18A1	0.7792	0.184302
KRT42P	1.1161	0.185504
TMEM82	0.783309	0.186297
CDX2	1.11027	0.187201
AC004947.1	1.27651	0.188663
CTSE	0.908874	0.189699
CASC20	1.11807	0.190686
MUSK	1.22132	0.191172
C3orf86	1.24032	0.191301
SLITRK6	0.883013	0.191693
CSAG3	0.916077	0.193963
LINC01975	0.544054	0.194761
CLCA2	1.19385	0.195366
AC022915.3	1.29088	0.1957
LIFR	0.871093	0.195809
SHROOM3	0.857084	0.1961
LINP1	0.906805	0.19647
AC093496.1	1.16628	0.1967
AP003548.1	0.7626	0.197779
SLC16A10	0.786566	0.198138
ADGRE1	1.14674	0.199895
LINC01151	0.787143	0.199939
LINC02292	0.618968	0.200709
WDR72	0.820526	0.20086
CHGA	0.854229	0.201831
AC091057.3	1.34353	0.202531
LINC00355	0.907328	0.203665
ALOX12P2	0.778076	0.205145
SLC47A2	1.15242	0.205992
C3orf18	1.27023	0.206015
TFF2	0.90782	0.206447
PLCZ1	0.850079	0.207028
DTL	0.766011	0.20868
LINC01105	0.783985	0.208854
PIK3C2G	0.896096	0.210877
AC013451.1	1.24238	0.211318
ATOH8	1.17972	0.211872
NPTX1	1.12208	0.211984
AC012409.3	0.782078	0.212025
CILP2	0.852863	0.212348
C5orf46	1.15136	0.213002
BLACE	0.799301	0.213164
AP000894.2	0.833575	0.213408
FUT9	0.85304	0.21382
EXO1	0.773146	0.214511
SPP1	1.13162	0.214649
LINC02156	1.22916	0.215131
MYO3A	0.918068	0.216282
ORM1	1.17011	0.216587
FAM178B	0.904109	0.217132
SCUBE1	1.11229	0.220436
LINC00332	0.706935	0.220786
UMODL1-AS1	0.76362	0.220982
GATM	1.17518	0.222651
RFTN1P1	1.17572	0.222991
HOXB7	1.25582	0.223143
LY6E-DT	0.802029	0.223661
LINC01839	1.38189	0.224219
AC002351.1	0.80621	0.224357
AP005057.1	0.843003	0.224812
LEMD1	0.876773	0.225044
RPSAP52	0.864565	0.22508
MESP2	1.11974	0.225757
MELK	0.725759	0.226489
AC093843.1	1.27659	0.226858
CCKBR	0.877268	0.227035
CDHR3	0.793538	0.227272
CREG2	1.13753	0.228015
FMO1	0.832613	0.229474
AHCYL2	1.4227	0.22963
LINC01914	1.1822	0.230333
CCDC33	0.840856	0.231305
CACNA2D2	1.23621	0.232191
TRIM31	1.1595	0.232235
ANO4	0.881042	0.232356
LINC02128	1.14937	0.2339
FAM3B	1.08903	0.234033
KHDC1L	0.901483	0.234388
AC008268.1	0.530927	0.234584
ITIH5	1.19906	0.235253
KIF2C	0.732243	0.235303
SIDT2	0.640958	0.236381
MFAP2	0.834097	0.236392
AL591501.1	0.876842	0.236395
LINC01451	1.15913	0.236444
LINC01287	0.901172	0.236708
SLCO1A2	0.895622	0.238632
UGT2B7	1.13058	0.238789
AC239798.4	1.1821	0.238883
AC012409.1	0.796884	0.239345
COL12A1	0.840524	0.239779
AC129492.2	0.821729	0.240689
APOBEC4	0.772366	0.241399
AC106771.1	0.871624	0.241767
C17orf99	1.2137	0.242008
LINC00365	1.12972	0.243274
AC027449.1	0.762417	0.243837
LINC02454	0.898058	0.243845
DLX1	0.90058	0.243908
FGD4	0.772089	0.244668
LINC00113	0.756322	0.244785
LINC01959	1.1972	0.244859
TFAP2A	0.772473	0.246905
NUF2	0.782227	0.246942
CSAG2	0.901831	0.24768
GNLY	1.13713	0.247787
ONECUT2	0.859443	0.24845
CREB3L1	1.19751	0.248897
RPL30P11	0.88562	0.24909
ASXL3	0.843446	0.24951
CCDC194	1.13758	0.249838
LINC01342	0.835358	0.250311
SMIM24	0.842127	0.252511
LINC01667	0.917731	0.252656
PRDM16	1.15029	0.252734
TFRC	0.819063	0.254248
AC139491.2	0.867797	0.254516
AL023755.1	0.851324	0.254742
AC093382.1	1.29226	0.256634
AL161431.1	1.10498	0.257217
LINC01633	1.1945	0.257508
MCM2	0.798973	0.257599
ABCC8	0.884316	0.257791
AL356417.1	1.18927	0.258052
AC079160.1	0.860818	0.258273
CPS1	0.882473	0.258422
TNC	0.874262	0.258827
AL031768.1	1.20207	0.260896
LINC01992	0.870812	0.260904
MAGIX	1.29302	0.261435
AC091179.1	1.18365	0.261701
CYMP-AS1	0.77118	0.262019
TSPAN10	1.20392	0.262399
GPC1	1.23161	0.262452
LINC01927	0.789078	0.262576
PMEPA1	0.845393	0.262981
FNDC1-IT1	0.788416	0.263045
VAT1L	0.823087	0.26305
CENPA	0.753327	0.263974
AC005357.2	0.74478	0.264084
AC022164.1	0.799483	0.264395
AL355601.1	0.856924	0.264528
ABI3BP	1.12167	0.266048
GPC2	0.843774	0.266086
AC006482.1	0.704185	0.266126
LINC01956	1.12991	0.266704
SLC12A2	0.776447	0.26684
MYO18B	0.907433	0.268012
CDC25B	0.778039	0.268133
AC012038.2	1.32253	0.268144
GNAZ	1.13315	0.268704
LINC01644	1.1124	0.269218
C12orf80	1.1894	0.269264
LINC01967	0.878458	0.269765
AC068473.4	1.13615	0.27001
GYG2P1	1.10979	0.270151
PACSIN1	1.13395	0.271701
HAGLROS	1.17297	0.272599
AL590426.2	0.408427	0.273742
ADAMDEC1	1.14751	0.274106
PNPLA7	1.23277	0.274496
SBSPON	0.881645	0.275245
FOXM1	0.793693	0.277942
AL357146.1	0.773876	0.278361
TESC-AS1	0.814103	0.278683
STON2	1.20579	0.278756
LINC02154	1.09333	0.279062
AC006372.1	1.10743	0.279161
KCNMA1	1.11841	0.27986
C2orf40	1.09164	0.280726
ALDH1A1	1.08869	0.281197
LINC02377	0.918996	0.281818
AC106799.2	1.11984	0.282919
LINC01193	0.882968	0.283111
LEPR	1.19686	0.284257
APLP1	1.15918	0.28611
CRYZL2P	1.22309	0.286171
LAMC2	0.867554	0.286573
AC107308.1	0.874694	0.286831
LGALS4	0.872358	0.287185
AC106798.1	0.894817	0.287339
LINC02345	1.12231	0.287547
SLC2A9	1.17878	0.288235
NKX6-2	1.15825	0.288586
ANPEP	0.853159	0.289807
TMEM56	0.880997	0.290771
AC025271.2	0.768866	0.29168
MIR548XHG	0.917528	0.292115
LRRC2	0.880514	0.292854
CEP55	0.778977	0.293116
PLPP4	0.902465	0.294089
AC079467.1	0.836523	0.294574
AF015262.1	0.847706	0.295216
LINC02561	1.09442	0.295535
AC114296.1	1.13331	0.295717
AC004817.3	0.893379	0.296007
VSNL1	1.21902	0.298571
AC079949.2	1.12612	0.298649
DISP3	1.12178	0.299414
GPRC5B	0.860538	0.299638
AC004009.1	0.75231	0.29986
AC068473.3	0.908701	0.300333
EGFL6	1.18863	0.300931
PKDCC	1.10834	0.301716
GCNT1	0.797629	0.302971
PGAM1P5	0.799673	0.303149
LUZP2	0.912884	0.303185
AC021785.1	0.857472	0.30329
AC124067.3	1.25024	0.303349
LINC01266	0.871386	0.303915
AL121904.1	0.804679	0.304116
AC007849.1	1.1465	0.304379
BCL2L14	1.16556	0.304567
DLX5	1.12502	0.305242
AP000526.1	0.877025	0.305508
C10orf90	1.10729	0.307638
CA1	0.84006	0.309232
DLL3	0.870156	0.309431
AC084026.2	0.810304	0.309535
SPATA8	0.780373	0.309798
AC092130.1	1.26187	0.310121
LINC01647	0.8064	0.310494
SLC5A9	1.12723	0.310727
ADH1A	0.85412	0.310739
DNER	0.910443	0.310821
AC022031.1	0.853831	0.312211
AP005328.1	0.894569	0.312312
LINC01096	0.883536	0.31237
ADGRD1-AS1	0.924141	0.312453
AL445250.1	0.895598	0.313664
SCNN1B	1.09341	0.313863
RPLP0P2	0.83548	0.314675
NUSAP1	0.807993	0.315119
ENPP1	0.844283	0.31595
TCN1	0.927872	0.316086
CFAP47	0.915298	0.316742
AP005717.1	0.840956	0.31683
IQGAP2	1.18771	0.317356
RETNLB	0.865638	0.31767
LINC02381	1.18811	0.318056
LINC02541	1.25486	0.31821
PM20D1	1.14456	0.318285
AC044839.3	0.892725	0.318866
PGBD5	1.12024	0.319372
CDH13	1.18029	0.319502
MUC16	1.08494	0.319743
CYP4F62P	1.22142	0.320741
AC127526.2	1.12673	0.321061
LINC01625	0.821567	0.321615
AVPR1B	0.799399	0.322044
SLC44A4	1.10758	0.32207
MST1L	1.14552	0.322925
AC064802.1	0.86241	0.322985
GOLGA7B	1.09858	0.323198
DEPTOR	0.823065	0.323465
AC000124.1	1.19315	0.324653
LINC01179	1.10294	0.324945
AL157904.1	1.2027	0.325329
CDCA3	0.760377	0.327016
AC093515.1	0.898557	0.329402
PYY2	0.931381	0.329735
TCTEX1D2	1.23991	0.331532
RUNX3	0.860885	0.331991
AL390334.1	0.898619	0.332268
AC097374.1	0.921725	0.333124
AC091170.1	0.92962	0.333548
LINC01234	0.925893	0.335609
LINC01554	1.13834	0.335924
ELFN2	0.895487	0.335992
AC015712.6	1.10447	0.33705
AC108865.1	0.916847	0.337841
CECR2	1.09563	0.33797
TENM2	1.09067	0.339374
LINC01943	1.28536	0.339774
SLC43A1	0.853164	0.340395
RPS3AP23	0.858867	0.341482
VEGFD	1.15872	0.341884
AC135782.1	1.18589	0.341912
SRRM3	1.14091	0.342169
AC130456.1	0.82822	0.343152
AC026462.3	1.24528	0.344769
AC091588.2	0.793349	0.344843
HOXC9	1.23164	0.3461
PRC1	0.774318	0.347199
LINC02331	1.26581	0.348344
COL22A1	0.912637	0.349671
LINC00645	0.880756	0.349933
CELF3	0.831067	0.350366
C1QTNF7	1.1345	0.350656
AC005355.1	1.13154	0.351177
B3GNT7	1.16853	0.352349
PLEKHA6	1.12936	0.3526
DUSP19	0.759353	0.35279
SYTL2	1.21352	0.353529
AC096711.1	0.862936	0.355804
AC023310.4	0.928193	0.35726
AC093627.6	1.1313	0.35758
ADAMTS12	0.881646	0.358395
LINC02389	0.871543	0.35857
AL031429.2	1.20438	0.358827
LINC01546	1.13964	0.359973
AL513318.2	1.11301	0.360356
MIR4435-2HG	1.28737	0.360711
COL11A1	0.927949	0.361516
RYR2	0.902492	0.36162
LINC02038	1.12433	0.363187
KRT17P2	1.13119	0.363215
AC239798.2	1.12339	0.363573
CADPS	0.866242	0.364253
C2orf48	0.875787	0.364368
AL139327.2	0.920499	0.364673
LPIN2	1.23603	0.365111
C9	0.911405	0.365241
PSG5	0.906164	0.365485
AL359764.1	1.18874	0.365893
GATA3-AS1	0.871686	0.365961
LINC01508	0.921355	0.366269
SERPINA1	1.11797	0.367366
AL606970.3	0.836729	0.367758
AC004801.5	0.820454	0.36808
LINC00470	0.939271	0.368121
LINC02241	0.931276	0.36922
SLC28A3	1.11107	0.369372
LINC01593	0.798365	0.369491
TGFBR3	0.901797	0.370504
ADCY5	1.08833	0.370928
OR9K1P	1.09224	0.371508
SULT1C2	0.86825	0.371567
AC245041.2	1.12819	0.371809
DUXAP9	0.894822	0.373101
PWAR6	1.10108	0.373242
AL137803.1	0.905804	0.373864
TGFBR3L	0.898287	0.374701
LINC01082	0.880101	0.374973
NXPH4	1.15058	0.375242
LINC01807	1.08227	0.375379
DGKD	0.780456	0.375787
BRDT	0.948352	0.376414
SLC6A20	0.893262	0.376783
AC073062.1	0.785289	0.377727
ERVMER34-1	0.868645	0.378006
AC008663.1	1.09182	0.378189
GNAO1	1.13719	0.380232
LINC02577	1.07037	0.380566
C12orf54	1.10708	0.38067
AC120498.2	0.844672	0.381025
CYSTM1	1.2882	0.381387
EFCAB1	0.898427	0.38141
TRIM73	0.795148	0.382395
ZIC4	1.06217	0.382481
DEGS2	1.09403	0.38305
COBL	1.0892	0.383199
MT1F	0.872851	0.385182
CARMN	1.11608	0.386382
AC135012.3	0.892987	0.386825
SLCO6A1	1.09831	0.386864
CKS1B	0.782498	0.387374
AOX1	1.11585	0.38788
CDK1	0.791323	0.388225
TSPAN1	1.09384	0.38848
SLC13A3	0.894452	0.389674
AC015908.4	0.772572	0.389943
AC019257.1	0.841174	0.390143
FAM221A	1.12937	0.390601
LINC02582	0.942472	0.390769
COL4A3	1.09911	0.391331
GHRL	0.808039	0.391918
CSAG4	0.917391	0.391918
AL133372.2	0.890624	0.393366
DNAH17	1.10692	0.393817
AC096751.1	0.872491	0.394001
CLDN16	1.14498	0.394579
DDAH1	0.860486	0.394601
MIR194-2HG	0.842455	0.394767
DRAIC	0.87489	0.396148
ITGA8	1.12143	0.396185
AC126768.3	0.898021	0.396894
AL158206.1	1.24889	0.3974
FAR2P4	0.944014	0.398505
ANKRD18B	0.921342	0.399044
KLF15	1.09213	0.399108
ARHGAP6	1.17032	0.399656
GALNTL6	0.858817	0.399864
LINC01806	1.15524	0.400403
KALRN	1.15845	0.401192
SP5	1.09129	0.401226
P2RX3	0.870495	0.401959
AC005165.1	1.10561	0.403708
ODC1	0.907199	0.404132
AC124312.3	1.11304	0.404719
AC025524.2	0.847195	0.404852
SCAT1	1.08668	0.404995
GABRE	1.12419	0.405289
LGI1	0.908184	0.406747
PRUNE2	1.06908	0.409667
AL121580.1	0.850699	0.409708
MYL7	1.09298	0.409734
GMPR	0.908538	0.410037
AP003059.1	0.875329	0.410285
LINC00251	0.804639	0.411369
AC004147.4	1.14169	0.411531
RFLNA	0.922076	0.412105
ABCA9	1.11183	0.412144
AL136369.2	0.798116	0.412221
AC128709.1	0.913279	0.412534
AC004982.1	1.14665	0.412914
AC037441.2	0.805887	0.414339
KLK4	1.11059	0.414603
AKR1C7P	1.08359	0.415355
PHF2P2	0.939039	0.415543
GATA3	0.903908	0.417923
AC116337.3	1.14315	0.419533
CNTN3	0.911841	0.421107
LINC01033	0.924706	0.422049
GPA33	1.12656	0.422066
LINC01142	0.850059	0.422175
AC009081.1	0.89758	0.422919
TPH1	0.869342	0.423464
PNLDC1	0.940596	0.42371
AC007848.1	1.10599	0.423962
LINC00911	0.881938	0.424421
LINC01338	0.8898	0.424552
REG1CP	0.836772	0.424624
AL133387.1	0.775453	0.425348
PLEKHB1	1.13501	0.426339
AC090192.2	1.09568	0.426712
TRIM40	1.10753	0.427993
TRPM3	0.901331	0.428076
VWA5B1	0.875559	0.428585
FER1L4	0.869238	0.429089
AC099518.1	1.09757	0.429653
DUXAP8	0.895084	0.430066
AC244453.1	0.837329	0.430871
AC124312.2	1.1192	0.431671
AL162511.1	1.18995	0.431873
GP2	0.933359	0.432499
PTGIS	1.05805	0.432519
AC015908.2	1.13571	0.432607
AC005186.1	1.17958	0.433958
AC092691.1	1.23411	0.434043
LINC01117	1.11356	0.434835
LINC02257	1.10991	0.436353
LINC02137	1.08892	0.439124
AL021408.1	0.868993	0.43952
ADH6	0.857596	0.440236
LINC01471	0.842932	0.440285
AC064807.2	0.860164	0.44186
SH2D5	0.925396	0.443115
LINC01814	1.10689	0.443341
CYMP	1.17095	0.444634
SORBS1	1.08424	0.444675
FBXL13	0.894255	0.445129
INPP5J	0.890874	0.445517
DCC	0.929122	0.446662
LINC00308	0.886907	0.447225
SLCO1B3	0.950007	0.447235
NPR1	1.14084	0.447346
LINC01561	0.905991	0.448858
RFX6	0.904716	0.449984
AL590644.1	1.0856	0.450147
DIRC1	0.898637	0.450182
AC020656.2	0.909555	0.450359
TREML3P	1.06558	0.450998
GALR1	1.10242	0.451184
SLC16A7	1.10968	0.452525
ATP7B	1.19322	0.452645
AC138512.1	1.17353	0.452763
FAT3	1.07798	0.454268
LINC00200	0.91469	0.454975
KIF4A	0.835109	0.455294
KIAA1324	1.06304	0.455886
LINC02434	0.937237	0.457026
LINC00671	1.12119	0.459501
AC019117.1	0.890345	0.459567
AL162411.1	1.08251	0.460602
EN1	1.05871	0.461038
AC012236.1	1.10817	0.461467
EPHA10	1.0923	0.46176
AC004920.1	1.10856	0.461772
AC104211.1	0.852642	0.461856
ST6GALNAC2	1.15528	0.462237
VGLL1	0.931976	0.462743
AP005436.3	0.863082	0.462953
RAB11FIP2	0.704818	0.463526
AL365356.3	0.934244	0.463949
ACSM3	0.864722	0.464111
FAM189A2	0.925633	0.464927
RBFOX3	1.10498	0.46495
LINC02006	1.08037	0.464961
KCNIP4-IT1	0.908462	0.466435
LINC00707	0.947437	0.467812
LINC00844	0.829453	0.468706
LINC02321	0.90208	0.468774
MIR29B2CHG	1.1213	0.469431
LINC01124	1.08492	0.470268
FENDRR	1.08301	0.470539
AOC1	1.07068	0.470935
LINC01748	1.14249	0.471538
AIM2	1.06262	0.474139
ARSEP1	1.13885	0.47431
ARX	1.09328	0.47456
PARD3B	1.11368	0.476483
AC104071.1	1.07583	0.476933
ME3	1.12882	0.477014
RERGL	0.910598	0.477422
TMPRSS3	1.08247	0.477468
SULT1C2P1	0.861446	0.478951
AC027698.1	0.869777	0.47904
RAD51AP1	0.869592	0.480613
AP003555.2	0.926922	0.480763
RSAD2	1.06696	0.484476
ITIH3	1.1274	0.485073
AC124312.4	1.11215	0.486352
C4orf51	0.934191	0.48667
KLHDC7B	0.946159	0.486871
AP000439.3	1.09118	0.487214
TP53TG3D	0.927685	0.487868
GALNT12	1.13891	0.489331
SMPD3	1.12883	0.489639
RAD54L	0.853228	0.490802
LINC01503	0.874716	0.49124
FRMD1	1.06556	0.491389
RORC	1.07713	0.491428
CNTN5	0.940224	0.491642
GAU1	0.884994	0.491839
MMP17	1.11665	0.492114
EVA1A	1.09427	0.493482
HJURP	0.852159	0.494688
PIGR	0.958403	0.496534
GBA3	0.9081	0.497673
KCNJ10	1.12411	0.49956
AC084211.1	1.12138	0.500417
GAS2	0.936594	0.500589
AC124861.1	0.900999	0.500971
TUBBP5	1.09563	0.501167
AL590438.1	0.887725	0.501228
DNAJB3	1.06327	0.501798
UNC5CL	1.13851	0.502181
LINC01100	0.875866	0.503794
AC131157.1	0.947464	0.504536
AP000907.2	0.840063	0.505786
ZDHHC19	1.10591	0.507206
AP000879.2	0.936703	0.507943
LINC01981	0.907032	0.508415
AC130456.2	1.09966	0.508867
ARHGAP44	1.14957	0.50948
CYP4A11	1.09762	0.510065
AC010343.3	1.05384	0.510848
LHFPL3-AS2	0.933003	0.511265
AC124254.1	1.08096	0.511556
FAM19A5	0.933518	0.511725
AP001180.2	0.836572	0.512161
AC024084.1	1.10175	0.512209
AL445072.1	0.916778	0.512315
TJP3	1.07014	0.513523
AC090125.1	0.911521	0.514164
PSORS1C3	0.925538	0.514666
INHA	0.934242	0.515587
AC091563.1	0.896717	0.517367
SLC44A3	1.11337	0.518932
CNTNAP2	0.947015	0.518942
CELA2A	1.11261	0.519306
TTLL6	1.08366	0.519765
GDF9	1.17816	0.519882
U62317.1	1.08439	0.520175
AL445686.2	0.843468	0.520328
ACACB	1.10805	0.520656
RASSF6	0.913069	0.520846
AC019211.1	1.12053	0.520962
UMOD	0.879346	0.52216
TNIP3	0.919603	0.523089
DAPK1-IT1	0.859603	0.523511
AC011247.2	0.886568	0.523678
ANOS1	0.924273	0.524697
AC099518.6	1.09663	0.525083
ADGRD1	0.92263	0.525632
FHL1	1.08119	0.525723
AC011595.2	0.889516	0.526706
AC087667.1	0.926787	0.52719
C8orf49	0.930093	0.52768
LINC01711	0.917513	0.528214
UCHL1	0.95613	0.528315
MYRIP	1.08476	0.530015
IGFL4	0.94559	0.530086
LY6K	0.943075	0.530264
ARSE	0.911683	0.530802
SYPL2	1.11175	0.531542
KCNS3	1.0781	0.53175
ALDOB	0.898219	0.532451
LHFPL1	0.947718	0.533068
NUDT1	0.84403	0.533122
AC007785.1	0.938744	0.533399
LINC00964	1.06791	0.534626
BIRC5	0.849102	0.535018
MSC	1.07619	0.535644
C6orf201	0.895621	0.535707
ABCC6	1.1452	0.536344
PRLR	0.942811	0.536388
HMGCS2	1.04885	0.537179
ADGRG5	1.07919	0.53718
AC131254.1	0.903229	0.538705
AC138904.1	0.942422	0.539312
CUX2	0.934889	0.539399
AC005722.2	1.0608	0.539839
INSC	1.09061	0.540228
ESRG	0.963091	0.540735
TNNI3	1.06003	0.540999
AC093159.1	1.0582	0.54118
MUC1	1.07981	0.541354
LGALS1	0.91302	0.541753
ESRRG	0.948328	0.54268
AC093865.1	1.07793	0.543003
PCSK9	0.929216	0.543455
FAM107B	1.15073	0.544159
PTPRJ	1.17625	0.545742
AL139081.1	0.881712	0.546262
AC022898.2	0.883136	0.546355
FNDC1	0.926151	0.547228
NDNF	0.92148	0.547361
HKDC1	0.937984	0.547446
MAL	1.0278	0.547962
MAEL	0.949864	0.548291
CASC16	0.895224	0.54879
ATP1A2	1.04521	0.549315
MYO5C	0.921171	0.5494
C4BPB	0.919354	0.550088
UBE2S	1.20416	0.550456
Z82196.2	1.11328	0.55111
AC082651.3	1.07327	0.551301
LINC01954	1.11069	0.551315
GRIN3B	0.932662	0.552017
CRISPLD2	1.11632	0.552024
AC096759.2	1.07226	0.552204
LINC01539	0.917068	0.553785
AL021877.2	0.952101	0.553813
FNDC5	0.916449	0.553957
LINC00314	1.17583	0.554375
AC023824.3	1.05271	0.554553
HSD3B2	1.11768	0.555009
AC007638.1	0.89547	0.555418
LINC00607	1.07059	0.555501
AC025271.3	0.891695	0.556513
AC116049.2	0.934572	0.557164
TMEM100	0.926365	0.557965
AC011131.1	0.907742	0.558493
CHIAP2	0.881713	0.560032
AL365271.1	0.864289	0.560201
GCLM	1.07507	0.560914
LINC01518	0.950685	0.561918
DKFZP434K028	0.877068	0.562656
B3GAT1	1.08211	0.563947
SLC13A5	1.04439	0.564082
DPP10	0.946991	0.564265
FGB	1.04192	0.565069
AC007405.1	0.93299	0.56507
MIR205HG	1.09618	0.565939
TPO	0.91435	0.566663
AC013762.1	1.0834	0.567407
LINC00393	1.05116	0.567454
Z99774.1	0.901339	0.567505
AC128709.3	0.944695	0.568022
MYOSLID	1.0774	0.569172
ADGRG7	0.934879	0.569396
TBX4	0.94428	0.57097
FOXD1	0.932779	0.571046
GJB7	0.937474	0.571518
TESMIN	0.922267	0.572485
AC106799.1	1.05935	0.572893
ZIC1	1.03534	0.572969
C9orf106	1.08146	0.57428
PHF24	1.05579	0.574817
AC023034.2	1.07566	0.574917
AC023794.2	0.919586	0.575208
HES2	1.06616	0.575248
RNF126P1	0.914767	0.575703
LINC01322	0.950084	0.576332
AC021491.4	1.11012	0.578229
AC108865.2	0.948298	0.579041
AC008687.3	0.900835	0.579087
AC122694.1	0.951392	0.579347
COL14A1	0.917756	0.580848
TMC5	0.931582	0.582144
CHMP1B2P	1.04204	0.582229
AC093627.1	0.936167	0.582572
GRIN2B	0.922357	0.584321
CNDP1	1.1028	0.58458
FGF4	0.954253	0.585669
ENAM	1.06266	0.587083
PTPRH	0.936086	0.588215
AC069148.1	0.932631	0.58928
LINC01206	0.958235	0.589578
PGM5	1.048	0.589781
GPR17	1.0794	0.589847
AL049838.1	1.08757	0.590641
PNLIPRP2	0.920063	0.591153
SLC39A5	0.90489	0.591666
AP000251.1	0.927318	0.592319
AC024581.1	0.940094	0.592376
IDH2-DT	0.920989	0.593151
KCNJ3	1.06142	0.593339
CPNE6	1.08415	0.594055
AC104564.2	0.93013	0.594408
AC006116.10	0.903937	0.595388
MIR2052HG	0.922442	0.595695
AC063919.1	1.14317	0.59606
LINC01050	1.07782	0.59618
LINC02344	0.915354	0.597251
FABP1	0.936661	0.597863
ATP8B1	0.894063	0.598197
AC009262.1	1.07843	0.598365
LINC02106	0.834139	0.598789
AC055758.2	0.953646	0.599815
AC130710.1	0.903078	0.599859
PROCA1	0.863654	0.600078
LINC02443	1.08931	0.600914
TSPAN8	0.953499	0.602134
AC034223.1	1.05019	0.602448
FJX1	0.884937	0.603591
U62317.4	1.09207	0.605369
AC016395.1	1.12007	0.605609
RRM2	0.890614	0.605622
ZBTB16	1.04824	0.605949
SIX1	0.939586	0.606098
MFSD2A	1.09496	0.606993
KRT17P1	1.06716	0.607297
LINC02532	1.05778	0.60811
OTC	0.896794	0.608151
PI16	1.04031	0.608694
CCDC196	0.92892	0.609279
TPRG1-AS1	0.931139	0.609284
WNT3	1.10473	0.610511
LINC00958	0.943324	0.611122
LINC01691	1.07818	0.612092
GALNT16	1.05975	0.612832
C2orf72	1.08157	0.613907
SLC7A14	0.94783	0.614137
C6	0.947617	0.614166
AC112493.1	0.941052	0.614433
VNN3	1.04311	0.614494
CDC20	0.877525	0.615176
GPR155	1.10028	0.615196
VSTM2A-OT1	0.84156	0.615726
AL133353.1	1.10471	0.616843
AP003059.2	0.897439	0.617229
DGCR5	1.07738	0.617644
DLX4	0.911879	0.617746
AC008517.1	0.939218	0.618359
COL2A1	0.954558	0.618491
ST18	1.06667	0.618686
FLJ36000	0.946143	0.61884
AC024337.1	0.839884	0.620713
LINC02031	1.04464	0.621507
UBE2C	0.877535	0.621643
IL1RAPL2	1.04945	0.621841
AC002401.4	0.956684	0.623169
TMEM105	0.94401	0.624588
AC113189.4	0.926505	0.62543
ASB5	1.03677	0.625655
AL355607.1	1.07022	0.629476
COL7A1	0.893397	0.629869
AC116021.1	1.08577	0.630542
AC023794.3	1.07385	0.631853
CD300LG	1.06914	0.632148
CAPN9	1.05794	0.636199
KCNA2	1.03541	0.637828
ABCA6	1.07496	0.638746
AC110048.2	1.06915	0.640321
AC099344.1	0.872904	0.640625
NCMAP	0.947644	0.640832
FAM237A	0.933313	0.6418
GALNT15	0.940351	0.642477
SLC38A11	0.9467	0.642788
SLAIN1	1.05162	0.642806
LINC02043	1.07838	0.643452
S100P	1.03805	0.644454
IL24	0.942233	0.644936
PLIN5	1.0655	0.645319
LINC01768	0.877864	0.645972
CLEC3B	1.06842	0.648005
AL589182.1	1.05583	0.648538
AC027338.2	0.920158	0.648912
BARX1-DT	0.941036	0.649341
SCUBE2	0.939941	0.649465
SLC28A2	0.949685	0.650943
AC015818.2	0.932365	0.652532
MMP11	0.94965	0.652679
MKRN3	1.07836	0.653846
DLX6	0.963852	0.654556
AC034223.2	1.03859	0.654901
TRHDE	1.03847	0.655724
AL133467.2	0.933675	0.661763
NKAIN3-IT1	0.956418	0.662751
GBX2	0.953266	0.663204
CKMT2	1.09483	0.663585
LONRF3	0.949702	0.664603
SLC41A2	1.09105	0.664986
ADD2	1.03908	0.665534
LRIG1	1.07348	0.667195
PHOX2B	1.06384	0.667272
CLEC12A-AS1	0.96152	0.668399
FLJ42969	1.04626	0.669466
ADGRD2	1.05485	0.669849
RBM47	1.1297	0.670188
LINC01160	0.964766	0.671172
2019-03-02	1.08099	0.672332
LINC01929	0.961965	0.672373
BX284668.2	0.951677	0.672603
ARHGAP18	1.15516	0.672868
DDC	0.959989	0.672918
PUDPP2	1.05663	0.673214
AL358334.2	0.951161	0.673951
ZNF540	1.07406	0.673969
LINC01510	1.07928	0.674439
AC022079.1	0.927603	0.675102
AC022639.1	0.960347	0.675258
SYNE1	0.927342	0.675334
HNF1A	0.935508	0.675489
CARTPT	1.04689	0.675953
AC108676.1	0.969892	0.675955
KL	1.08494	0.676285
AZGP1	1.03157	0.676301
LINC01416	0.946413	0.676527
MIR2117HG	1.04642	0.677564
NRM	0.869234	0.677859
AL355483.1	0.932242	0.678806
AL109954.2	1.07291	0.679548
STRA6	0.960074	0.679803
TMEM45A	0.944915	0.679829
AC104041.1	1.07759	0.680749
IGFL2-AS1	1.0329	0.681209
TCEAL2	1.03818	0.681311
NMUR2	0.952449	0.681315
ZP3	0.934079	0.681737
AC122710.2	0.947532	0.682204
AC127526.1	0.913133	0.682503
CA8	1.03634	0.682821
GASAL1	1.07134	0.68416
AC009878.1	1.07266	0.685318
PANTR1	1.05945	0.685725
HEPACAM2	1.05656	0.685858
AL078590.2	1.03192	0.686929
AP003037.1	0.119613	0.687075
KLHDC8A	0.9384	0.687312
PTH2R	1.02632	0.687625
MIR663AHG	0.938551	0.690662
NTF4	1.10069	0.690929
GLDC	1.04037	0.692439
AC091182.2	0.957507	0.69258
LINC02544	1.06418	0.692742
FRMD3	1.07991	0.69286
AC093599.1	0.950418	0.693215
PAK3	0.963989	0.693986
AC107419.1	0.964002	0.69436
HOXD10	0.951899	0.694531
RD3	0.924696	0.694843
AL034374.1	0.922651	0.695485
SELENBP1	1.04672	0.695871
VSTM2A	0.940133	0.696735
UBE2U	0.962829	0.696898
LINC00640	1.06064	0.697959
LINC00491	1.04841	0.698114
CLEC19A	0.931256	0.698329
LINC00615	1.04729	0.698427
CARD17	1.03923	0.699184
ENTHD1	1.04094	0.69981
PSCA	0.969947	0.699856
AC135586.2	1.11384	0.700088
GLRA3	1.03964	0.70115
LINC00643	0.934354	0.701543
LINC00891	0.92461	0.701887
ST6GALNAC1	1.03752	0.70286
AC016205.1	0.952631	0.703794
MT1JP	0.944825	0.704752
C17orf82	1.05857	0.705867
HNF4G	1.04229	0.707896
PTGES	0.946596	0.708685
AC099487.1	1.05002	0.70936
STMN1	1.09918	0.709411
CCL3L1	1.04961	0.710141
AGTR1	1.03821	0.710227
AL358176.4	0.933621	0.710263
AL357558.2	1.0905	0.710304
AP005230.1	0.956041	0.710554
AC245187.1	0.913577	0.710598
AL078601.2	1.1075	0.711559
PCDH11Y	0.945973	0.711702
AC106712.1	1.05587	0.712552
ITM2A	1.06726	0.713128
LINC02428	1.04722	0.713214
ARPP21	1.048	0.71395
AC113398.2	0.893191	0.714003
MAFA	0.950508	0.714702
OGN	1.0413	0.715001
AC139749.1	0.966482	0.715209
PLAU	1.06605	0.715465
AL138881.1	1.03991	0.717356
PEBP4	0.947704	0.718132
TMCC2	1.06284	0.718269
LINC02539	1.06221	0.718942
AC004982.2	1.06989	0.719055
AC006206.2	1.05255	0.71945
EPS8L3	1.03892	0.721084
AC022075.2	0.947459	0.721155
AC002546.1	0.935466	0.722273
MEGF10	0.960041	0.722282
SLC6A14	0.970107	0.722554
LINC01249	1.02469	0.723812
AC007731.2	0.922753	0.724572
KRT89P	1.07002	0.724609
CYP27B1	1.04896	0.724875
FAP	1.04765	0.725165
GINS1	0.920372	0.725655
MAGEA10-MAGEA5	0.961786	0.726085
AL359771.1	0.971474	0.726133
AC090503.2	0.949206	0.726401
AC078842.1	1.06582	0.726633
AGR2	0.967079	0.728082
LINC01995	0.965479	0.728954
TNNT1	1.03568	0.729242
AC009093.6	0.927959	0.729269
PTTG1	1.10844	0.73019
TGFBI	1.04653	0.730505
DNALI1	0.941143	0.731132
LINC02411	1.0966	0.731739
MROH2A	0.968168	0.732159
AP001476.3	0.926491	0.732242
LINC01985	0.938865	0.732392
GSTM5	1.06911	0.733
AL118511.2	0.919924	0.733417
AL139275.1	0.918001	0.734364
CYP3A5	1.0408	0.734512
CADM2	0.972418	0.734788
COL24A1	0.945684	0.737115
SLC4A4	0.955696	0.737997
AL161630.1	0.933659	0.738563
SLC1A2	0.955502	0.739008
AL049649.1	1.04314	0.739899
MANCR	1.04336	0.741108
RAET1K	0.948706	0.742649
CHRM2	1.04293	0.743425
DCSTAMP	0.966951	0.745111
BCL2L15	0.943152	0.745328
AC069360.1	1.04979	0.745332
LINC02407	1.05635	0.746346
ZMAT1	1.039	0.746627
WDR66	0.952615	0.747533
AL355974.2	1.0329	0.747725
AQP7	1.041	0.748053
KCNB1	1.02926	0.748602
FAM83E	1.03659	0.748639
NKAIN1	1.04364	0.749351
AC090970.2	1.06918	0.749994
PKMYT1	0.923336	0.750151
AL512625.2	1.05012	0.751509
AMPD1	0.959359	0.752836
AC005180.2	1.04245	0.753159
RAB3C	1.03545	0.754011
KLHL41	1.0466	0.754042
ADAM8	1.03644	0.754054
FOXCUT	0.95653	0.755285
SLC4A10	0.960383	0.755452
TEX41	0.974614	0.755701
AC024230.1	0.966972	0.755964
FCGBP	1.032	0.756585
MYT1L	0.957341	0.757392
FAM71F1	0.96861	0.758194
AC131532.1	1.03711	0.758792
RIPPLY3	1.0322	0.759424
GBP5	1.02918	0.760018
LCN6	1.04676	0.760025
AL135818.2	1.03617	0.760026
FAM135B	0.96713	0.760448
FAM107A	1.03697	0.761426
AL355303.1	1.04045	0.76221
PIFO	0.960705	0.763805
GGT1	0.954551	0.764118
AL513304.1	1.03223	0.764216
AC091544.2	0.960205	0.764773
LINC01592	0.964779	0.764912
AC109439.2	0.967672	0.765514
RETREG1	1.04626	0.765712
LINC00557	0.946245	0.765796
CA9	0.980474	0.766253
SOX2-OT	0.971652	0.767125
GC	0.947677	0.767304
CXCL1	1.03253	0.767536
AP002784.1	1.03533	0.767667
AL590004.3	1.03937	0.767798
PRR26	1.0439	0.769234
AL359382.1	1.04866	0.769345
PRKN	1.05437	0.770342
PTPN5	0.963166	0.770383
AL161640.1	1.05142	0.770789
CDH26	1.0334	0.770798
MFSD4A	1.03205	0.771058
LINC02450	0.967319	0.771169
NRSN1	1.03831	0.771254
LY6E	0.948065	0.772253
AC003092.1	0.96029	0.773151
MAMDC2	0.972054	0.774453
PIP5K1B	0.960502	0.774677
LINC01746	0.916931	0.776262
CHST1	1.03109	0.776485
KBTBD12	1.03143	0.777392
AC022140.1	0.966443	0.778911
TMEFF2	1.03382	0.779077
AC005920.4	1.03744	0.77944
AC104695.1	1.05874	0.779596
AP003117.1	0.949357	0.77976
AC008808.2	0.936863	0.781945
AL683887.1	0.965693	0.782148
LINC00710	0.965333	0.782545
MAPT	0.956691	0.785101
AATK	1.06376	0.785469
FSIP2	0.971693	0.78692
AC025271.4	0.965133	0.787805
LINC01139	1.01809	0.788725
AC007128.2	1.02987	0.788919
COL5A1	0.964765	0.788966
AL139275.2	1.06429	0.789242
AC004585.1	1.04328	0.789389
GOLM1	1.06073	0.789898
LINC02242	1.03985	0.790864
AC096888.1	1.06496	0.790999
ORC6	0.926019	0.791024
LINC01819	1.03013	0.791929
SYNPR	1.03584	0.792527
AC093833.1	1.05639	0.793065
FMO5	1.07014	0.793925
AC010255.3	1.04362	0.794597
USH1C	0.974672	0.795001
CNKSR2	1.02387	0.795096
SYT4	1.03404	0.795392
AC124067.4	1.04584	0.795446
NCAM1	0.972699	0.795448
AL355076.2	0.96097	0.796169
LINC01980	0.975554	0.796393
AQP4	0.975141	0.796681
AC080129.1	0.970823	0.796838
UGT2A1	0.97189	0.79752
MIR7-3HG	0.949672	0.797721
EPHA5-AS1	0.949079	0.798301
NR3C2	0.970699	0.798999
KC6	0.977684	0.799168
HERC2P5	0.969168	0.799407
ANO1	1.02463	0.799466
AC051619.8	1.0646	0.800257
AC012462.1	0.942913	0.800976
KCNH7	0.957748	0.802085
AC245595.1	0.850111	0.802749
ITLN1	0.967647	0.803359
ZPLD1	0.969326	0.80361
LINC01615	1.02361	0.804336
AC007950.1	0.938588	0.804677
SEMA5B	1.03631	0.805423
HEY1	0.970433	0.805975
GRIN2A	0.978554	0.806242
MAPK12	0.953941	0.806296
RMST	0.972043	0.80637
GAL	1.01897	0.806393
LINC00940	0.927184	0.80648
AC027612.2	0.965262	0.807206
CGNL1	0.972691	0.807374
ALB	1.02962	0.807525
AC005180.1	0.96884	0.80825
CDH3	0.954452	0.808354
AL121895.2	0.970255	0.808504
AC019155.3	0.975275	0.808858
EGR2	1.0277	0.809602
PLAC8	0.978235	0.810047
LINC00906	0.96312	0.810573
ANGPTL3	0.954381	0.810676
AL583808.1	0.980589	0.810777
AP004608.1	1.037	0.811039
LINC00885	1.02111	0.811853
AC012485.2	1.04882	0.811926
TRIM36	0.959701	0.812243
ZNF385B	0.978471	0.812401
AC090735.1	0.971407	0.812936
AC006372.3	1.02244	0.813215
ACTN2	1.02893	0.813364
CTNNA2	0.974315	0.814232
SLC6A10P	1.01961	0.814442
ABCC6P2	0.967585	0.815025
LINC01010	1.02805	0.815232
LINC01524	0.970997	0.816408
KAZALD1	0.951061	0.816415
F10	1.05118	0.816896
RGS7BP	0.978444	0.817172
LINC02343	1.07378	0.817334
VXN	1.02818	0.819064
CNTD1	0.920066	0.819341
COCH	0.981859	0.820398
GCOM1	0.978226	0.82135
LINC00454	0.941732	0.821406
INHBE	0.965479	0.821471
KCNJ11	1.02423	0.822123
PP7080	1.03962	0.822695
ROR1	0.969509	0.823221
LINC01783	1.03593	0.823551
AC010280.1	0.982086	0.823798
AC034213.1	1.02234	0.824509
DOK7	0.971081	0.824624
AFF3	1.02347	0.825557
LINC01705	1.02677	0.826254
ABCA13	0.980265	0.826954
LINC01640	0.945202	0.828695
PCAT18	1.02515	0.830567
CU639417.4	1.02793	0.8308
LINC01932	1.02986	0.830976
KRT17P6	1.03027	0.831595
LINC00930	0.970157	0.832106
LINC01504	0.975599	0.832118
AC087269.1	1.03835	0.832728
RGR	1.03368	0.832923
AC012501.1	0.973957	0.833116
IQCA1	1.02296	0.833674
ADAMTS9-AS1	1.01904	0.834139
KBTBD11-OT1	0.959857	0.834208
PARAL1	0.973788	0.834774
SORBS2	0.973159	0.835019
AC004801.3	0.942825	0.838738
LINC02438	0.977505	0.839661
HOXD11	0.976403	0.840577
IL12RB2	0.979399	0.840969
SHCBP1	0.950963	0.841303
GRM4	1.02383	0.841351
GABRB2	1.0189	0.842349
AL360181.4	0.955443	0.842409
GMDS	1.06153	0.842565
LINC02408	1.03122	0.843104
SRRM4	0.969591	0.844647
LINC01331	1.05503	0.84554
AL355877.1	1.03232	0.845615
SLC47A1	0.979862	0.84609
AC011379.1	1.0382	0.846318
DMC1	0.970236	0.846601
AL357143.1	0.980803	0.848086
DUSP9	1.0306	0.848142
NAA11	1.01341	0.848444
CAGE1	0.964532	0.849127
TDO2	1.0351	0.849237
BMS1P17	1.02451	0.849291
MASP1	1.02255	0.849297
SMOC2	1.02454	0.849345
LINC02466	1.01782	0.849603
AP005229.2	1.02446	0.851253
IGF2BP3	0.98443	0.851652
ABCC6P1	0.972398	0.852224
SERPINA9	0.984362	0.852885
KC877982.1	0.985315	0.853826
IL1RAP	0.961985	0.854412
AC005330.1	1.02564	0.854836
AL353803.5	0.95637	0.855674
MACROD2	1.02955	0.857678
SULF1	0.975572	0.857871
RDH16	0.977016	0.858262
AC112721.2	0.972091	0.85924
AC063952.1	1.03178	0.859508
TMEM26	1.03178	0.859838
LINC01351	0.974274	0.859899
MMEL1	1.02762	0.860787
PTPRB	0.960059	0.861598
GRIA2	1.01799	0.862506
CASC15	0.97674	0.863966
LINC00973	1.01937	0.864289
LRAT	1.0139	0.865263
LINC02015	1.01681	0.866292
AC134312.5	1.02231	0.866369
AC114400.1	0.967361	0.866524
ZNF114-AS1	1.02498	0.8674
TUSC8	0.977307	0.867577
SNX10	0.966449	0.867761
CDKN3	1.04869	0.868115
GTF2IRD2P1	0.982948	0.868459
TYMSOS	0.965273	0.868841
OTP	1.01962	0.869034
ADRA1A	0.980349	0.869607
LRRC31	0.981019	0.871032
AC008109.1	0.985502	0.872001
PGCP1	1.0439	0.872561
LYZL4	1.03108	0.872807
APCDD1L-DT	0.984254	0.873591
AC073359.1	0.962223	0.873841
ANXA13	0.977508	0.873948
FMOD	1.02662	0.875066
ADAM33	0.971905	0.875488
SNTB1	0.968353	0.875612
SH3GL2	1.0157	0.876275
AL136162.1	0.964431	0.877282
SORCS1	1.01351	0.877816
AC083967.1	1.01627	0.877848
ALDH6A1	1.04624	0.878181
TTLL11-IT1	1.01722	0.878213
CPED1	1.02301	0.878347
LINC02470	0.98428	0.878878
GRAMD1B	1.01633	0.879249
AL139383.1	1.0246	0.88045
THRB-IT1	0.977795	0.880642
RGL3	0.982522	0.880913
SEMA3E	1.01379	0.880972
HIF3A	0.987402	0.881037
AC025280.1	0.970053	0.881063
AC128709.2	1.01477	0.881532
PKIB	0.974621	0.883218
TTC6	1.01235	0.884575
AC129926.1	0.977189	0.885848
AC133041.1	0.960898	0.886043
HOXC10	0.983091	0.886048
C7	1.00923	0.886102
LINC01614	0.986486	0.886862
CIB4	1.02551	0.888322
MMP14	0.963931	0.888487
CFTR	1.01349	0.889286
FXYD4	0.984296	0.889996
FAM149A	1.01555	0.890563
WNK4	0.984042	0.891206
LINC01305	0.984701	0.891242
LINC00689	0.986923	0.891486
PLA2G2A	1.00958	0.891516
AL161457.1	1.02643	0.891666
AC055758.1	1.01222	0.891808
AC005920.1	0.97518	0.892482
FAM47E	0.980097	0.893342
TMEM52B	1.01416	0.893485
CASQ2	1.01308	0.893655
AL358332.1	1.02221	0.895857
IQCM	1.01399	0.896097
AL121656.1	0.980069	0.896471
ENPP5	1.01151	0.898392
FABP4	1.00817	0.900234
MMP20	0.987011	0.900413
GLYATL2	0.991978	0.90254
AL034347.1	0.978759	0.903318
ICA1	1.01394	0.904195
TRIM50	1.02298	0.904684
PRSS2	0.990172	0.904874
GCNT3	1.01243	0.905022
AL355073.1	0.977363	0.905024
CDH24	1.02987	0.90517
SMYD1	1.01174	0.905329
TMPRSS2	1.0107	0.906787
CEACAMP10	0.98291	0.907458
LINC01905	1.01487	0.908864
B4GALNT1	1.01217	0.910121
PRR5L	0.981789	0.911196
AL445647.1	0.990049	0.911561
PLLP	0.979099	0.913618
AC078906.1	0.987555	0.913635
ADAM12	0.985069	0.914046
AC018926.3	0.979948	0.914255
CXCL6	1.01182	0.914486
CHRNA9	1.00805	0.914492
AC090282.1	1.01279	0.915645
AC117498.2	1.01772	0.916103
AL035258.1	0.991876	0.916303
DNAJC22	0.98692	0.916683
AL353764.1	1.02193	0.916909
AKAP12	1.01515	0.917457
REPS2	1.0167	0.917548
LINC00237	1.01337	0.917707
AJAP1	0.990537	0.918474
CAB39L	1.02471	0.91848
LINC01410	1.02115	0.919561
BGN	0.984555	0.919597
NME5	0.987189	0.919763
AC078845.1	1.01057	0.919818
SIGLEC15	0.982782	0.920011
FAM83A	1.00858	0.920232
CELA3B	1.01742	0.920978
A1CF	1.01878	0.921022
LINC01854	1.00741	0.923968
DUXAP10	0.986438	0.926684
ADAM28	1.01293	0.92703
AL137793.1	1.01729	0.927226
AC026355.1	0.990316	0.929624
ANKRD20A19P	1.00858	0.929653
SPINK7	1.0049	0.930584
ANO5	0.991894	0.931769
AP002957.1	1.01044	0.932483
AC123912.4	0.99075	0.932663
AC026785.3	0.99196	0.93311
SDK2	0.991401	0.933122
SLC9A2	1.00766	0.933534
AC016735.1	1.01398	0.933573
AL139246.3	1.01588	0.934381
CHIT1	0.991388	0.934972
LINC02607	1.00902	0.93522
C12orf56	0.984293	0.935614
AL136131.2	1.01317	0.935875
BX322234.2	0.988923	0.93591
AC244502.3	1.01222	0.935965
SEMA4G	1.0146	0.936592
HHIP	0.991745	0.936612
AC105150.1	0.977158	0.937681
KCNG1	1.00773	0.93772
AL162574.2	1.00746	0.939242
NEUROD1	0.989479	0.939279
MYO1A	1.01304	0.939725
AL391152.1	0.987629	0.940453
CYTOR	0.983665	0.941915
AC015908.3	0.987921	0.942041
LINC01060	1.01042	0.943803
CARNS1	0.98311	0.945038
SYBU	1.0066	0.94589
SNX29P2	0.986824	0.946371
ANK2	0.992031	0.946661
LINC02574	1.01052	0.946767
AC079062.1	0.996241	0.946863
ERBB4	1.00613	0.946907
AL133467.4	0.988849	0.947033
CLCNKA	0.988341	0.947521
AL391704.1	1.00701	0.948434
GLOD5	1.00994	0.948701
DOC2A	1.00756	0.950017
LINC01727	0.98724	0.950385
DMRT2	0.995553	0.950555
AL645608.7	0.992296	0.950712
PVT1	1.01601	0.951696
CABYR	0.992769	0.951706
RNF17	1.00463	0.952516
MAT1A	0.992981	0.953254
AP000525.1	0.992726	0.953482
LYVE1	0.992314	0.953527
LINC01901	1.00467	0.953688
HPN	1.00503	0.9542
ESM1	1.00893	0.954445
GPD1	1.01166	0.954519
TAAR3P	1.01073	0.95452
MUC13	1.00525	0.954597
NEGR1	0.992675	0.955332
PODNL1	1.00925	0.956263
CFAP99	0.989965	0.956517
NTN4	1.01059	0.957422
RGS20	0.993829	0.957938
PODN	0.992891	0.958492
PLA2G2C	1.00824	0.958998
ADCY6	1.0124	0.960445
GBGT1	1.00885	0.961285
LINC00457	0.988322	0.961409
LAMP3	1.00839	0.962141
RGS5	0.990521	0.962945
AL354872.2	0.992001	0.964442
VSIG1	0.993003	0.965912
MAGED4B	1.00614	0.966104
LNCTAM34A	1.01127	0.966455
AL157373.2	1.00377	0.967178
AC010329.1	0.995789	0.967468
SPACA3	1.00772	0.967903
CASC9	1.00425	0.968051
AL450468.2	0.986923	0.96888
HERC2P4	0.996561	0.969104
AC005993.1	0.995514	0.969745
LINC00460	0.996637	0.97034
OFCC1	1.00394	0.970367
MAGI1	1.0102	0.970514
MECOM	1.00557	0.972171
ZNF536	1.00338	0.972633
AC116609.1	1.00501	0.972887
LINC02518	0.996323	0.973408
SLC4A1	1.00453	0.973474
CDHR5	1.00637	0.973807
AC025575.2	1.00292	0.974557
LINC00665	0.996926	0.97465
CAPN13	1.00205	0.975168
AL365356.5	1.00351	0.976102
CFAP221	1.00328	0.97612
AC007495.1	1.00345	0.977352
CYP4F30P	1.00525	0.978941
NEFM	0.998302	0.979718
AC004921.1	0.995947	0.980772
PDE1C	1.00309	0.982358
AC007207.2	1.004	0.98277
ADAMTSL3	1.00197	0.982854
GS1-24F4.2	0.997426	0.983125
CLEC5A	1.00407	0.983306
MAATS1	0.998275	0.983867
AC004704.1	1.00215	0.984649
LINC01116	0.997826	0.985262
SLC1A1	0.997504	0.985305
LINC01978	0.996543	0.986228
LINC01391	1.00146	0.986602
SMPDL3B	1.00203	0.987001
DEFB126	1.00166	0.988451
WSCD1	0.997662	0.988723
LINC02435	1.00208	0.989942
AC109462.2	1.00157	0.99025
GLYATL1	0.998672	0.991317
AC241377.2	0.996928	0.991901
PCLAF	1.00245	0.993532
COL27A1	1.00148	0.993969
LINC01456	1.00071	0.994412
IGFL2	0.999439	0.994523
GABRB3	0.999491	0.995075
FAM19A2	0.998644	0.995106
AC113346.1	1.00062	0.995499
WNT7A	1.00011	0.999056
DPP6	1.0001	0.999201

## Sheet: miRNA
Univariate Cox regression analysis results of miRNA of the remaining 80 ESCC samples
miRNAname	HR	P
hsa-miR-5699-3p	3.7198	8.16e-05
hsa-miR-552-5p	2.00973	0.00218464
hsa-miR-378c	1.70797	0.0191133
hsa-miR-192-5p	1.87131	0.033635
hsa-miR-767-5p	0.872781	0.0357004
hsa-miR-338-3p	1.74188	0.0367188
hsa-miR-338-5p	1.59134	0.0390816
hsa-miR-194-5p	1.81639	0.0464412
hsa-miR-105-5p	0.882799	0.0533462
hsa-miR-34b-5p	1.29612	0.0539679
hsa-miR-767-3p	0.729753	0.0583687
hsa-miR-508-3p	0.749303	0.0687035
hsa-miR-215-3p	3.14609	0.0770419
hsa-miR-548f-3p	0.772415	0.0841896
hsa-miR-514a-3p	0.805224	0.087224
hsa-miR-3690	1.50182	0.0923655
hsa-miR-383-5p	0.66477	0.0929136
hsa-miR-215-5p	1.46442	0.0949159
hsa-miR-34c-3p	1.22158	0.100885
hsa-miR-139-5p	1.387	0.104979
hsa-miR-34c-5p	1.19813	0.107909
hsa-miR-944	1.25714	0.135009
hsa-miR-4449	1.18484	0.1577
hsa-miR-509-3p	0.836242	0.177767
hsa-miR-508-5p	0.649059	0.182675
hsa-miR-194-3p	1.41535	0.195979
hsa-miR-135a-5p	1.16415	0.208782
hsa-miR-6728-5p	0.701883	0.213559
hsa-miR-153-5p	1.23171	0.215595
hsa-miR-133a-3p	1.11603	0.215595
hsa-miR-6891-5p	1.36135	0.218904
hsa-miR-224-3p	1.23582	0.230031
hsa-miR-452-3p	1.24658	0.234933
hsa-miR-937-3p	0.862067	0.270152
hsa-miR-519a-5p	0.773851	0.271339
hsa-miR-205-3p	1.30653	0.27797
hsa-miR-452-5p	1.19611	0.297389
hsa-miR-4778-3p	1.17249	0.298789
hsa-miR-675-3p	0.905553	0.30111
hsa-miR-34b-3p	1.14528	0.306266
hsa-miR-636	1.2939	0.321056
hsa-miR-6499-5p	1.12478	0.328007
hsa-miR-431-5p	0.859856	0.339648
hsa-miR-708-5p	0.814743	0.361677
hsa-miR-5579-3p	0.869511	0.397314
hsa-miR-1269a	1.044	0.415458
hsa-miR-4652-5p	0.864681	0.418338
hsa-miR-483-5p	1.19092	0.423568
hsa-miR-192-3p	1.23172	0.436406
hsa-miR-301b-5p	0.849284	0.453036
hsa-miR-6777-5p	0.836392	0.5039
hsa-miR-2277-3p	0.832772	0.531781
hsa-miR-548d-3p	1.14164	0.621232
hsa-miR-4517	0.902204	0.675115
hsa-miR-6499-3p	0.949695	0.709125
hsa-miR-133a-5p	1.07074	0.72374
hsa-miR-205-5p	1.076	0.727324
hsa-miR-296-3p	0.951499	0.754628
hsa-miR-224-5p	1.04774	0.758359
hsa-miR-1304-3p	1.0387	0.792896
hsa-miR-490-3p	1.027	0.810402
hsa-miR-301b-3p	0.961268	0.818312
hsa-miR-4664-3p	0.952473	0.82499
hsa-miR-129-1-3p	1.04695	0.836415
hsa-miR-573	0.955812	0.852563
hsa-miR-1911-5p	0.982069	0.852829
hsa-miR-129-2-3p	0.935588	0.854008
hsa-miR-516a-5p	0.973885	0.862349
hsa-miR-210-3p	1.02483	0.884207
hsa-miR-204-5p	1.01688	0.892679
hsa-miR-1910-5p	0.979137	0.899085
hsa-miR-1293	1.01216	0.91715
hsa-miR-1468-5p	1.02012	0.918793
hsa-miR-153-3p	1.01844	0.919724
hsa-miR-148a-5p	1.01379	0.95024
hsa-miR-202-5p	1.01177	0.968447
hsa-miR-375-3p	1.00338	0.969732
hsa-miR-148a-3p	0.997834	0.994072
hsa-miR-29b-2-5p	1.00025	0.999172

## Sheet: mRNA
Univariate Cox regression analysis results of mRNA of the remaining 80 ESCC samples
mRNAname	HR	P
KCNE2	0.955046	0.798248
GHRL	0.818745	0.404806
ALDOB	0.898045	0.531273
FMO5	1.06699	0.801574
TMED6	1.03652	0.931106
SULT1C2	0.869265	0.372653
VSIG1	0.991897	0.960965
TRIM50	1.01926	0.918266
CYSTM1	1.29745	0.37604
NR0B2	0.952164	0.797212
SMIM24	0.840509	0.249335
C16orf89	0.944239	0.680823
CLDN18	0.87169	0.193669
PBLD	0.927395	0.833571
MYRF	0.984357	0.926124
MFSD4A	1.03157	0.774367
AKR7A3	0.930543	0.663909
B3GAT1	1.07949	0.572345
SIGLEC11	1.22666	0.175292
SPINK1	1.02774	0.787864
MYO1A	1.01199	0.944309
SMIM6	1.10794	0.642659
ASB11	0.98056	0.90488
IGFALS	0.914623	0.616336
ATP4A	0.808669	0.142277
VSIG2	1.03686	0.761208
IHH	0.876997	0.325109
CDHR5	1.00546	0.977297
LGALS4	0.87239	0.285685
TESC	1.2949	0.153856
NOSTRIN	0.983292	0.947165
KCNQ1	1.30062	0.186321
CDHR2	1.35431	0.143606
C6orf222	1.0307	0.819738
HNF1B	1.00714	0.961562
IYD	0.898748	0.431519
DGKD	0.78813	0.383295
BTNL8	1.00512	0.975534
SLC1A2	0.955555	0.737115
FOXA3	0.974476	0.860691
PTPRN2	1.17868	0.287503
GRIA4	0.83348	0.149405
GPER1	0.822341	0.254745
SLC4A4	0.95577	0.736429
CKMT2	1.09345	0.668533
HNF4A	0.842672	0.163071
SST	0.918682	0.531984
KCNJ13	1.0808	0.742186
GPR35	1.56687	0.0686144
PTGDR2	1.00594	0.980449
SLC5A5	0.976548	0.820367
CAPN9	1.05709	0.641123
ESRRG	0.948566	0.542949
CCKBR	0.878532	0.227401
ACSM3	0.868015	0.468486
APOBEC2	1.13239	0.530355
GATA6	0.821586	0.300001
LRRC66	1.00156	0.992256
VILL	1.10292	0.62284
SUCLG2	1.10655	0.815301
SLC26A7	0.820869	0.102674
SERPINA5	0.995189	0.963006
BCL2L15	0.94265	0.741955
MYRIP	1.08434	0.533297
GPA33	1.12317	0.428368
TSPAN8	0.953026	0.598936
FUT9	0.853158	0.212863
A1CF	1.02082	0.91227
SLC28A2	0.948577	0.643917
MYBPC3	1.08547	0.61808
PDILT	0.931669	0.672849
SSTR1	1.02475	0.806826
HABP2	1.33812	0.0555656
ASAH2	0.854794	0.341664
PLCXD3	0.971521	0.760368
PHGR1	0.842425	0.133579
LEFTY1	0.845944	0.340217
CNTD1	0.922655	0.817429
CHST5	1.03368	0.816197
C14orf180	0.780207	0.443543
TM4SF20	0.886402	0.325207
ESRRB	0.827118	0.242728
GIF	0.927077	0.49181
CHGA	0.852316	0.199176
CLIC6	1.01001	0.927077
CTSE	0.908466	0.188056
SIK2	0.29196	0.00587138
GPR155	1.09933	0.619093
HNF1A	0.935932	0.674704
ANGPTL3	0.953554	0.806575
GUCA2B	0.767299	0.312828
CPA2	1.0693	0.485582
BHLHA15	0.713778	0.0666775
GKN2	0.962273	0.753505
TFF2	0.907476	0.204677
EPS8L3	1.03865	0.723906
NPC1L1	0.955405	0.794932
FBP2	0.958118	0.724771
CELF3	0.837174	0.360707
ATP4B	0.917635	0.526788
SULT2A1	0.980633	0.894171
SLC6A19	1.10092	0.411701
PSCA	0.96924	0.695304
NR1I2	0.918085	0.527929
TM4SF5	1.04637	0.748185
IQGAP2	1.18773	0.318752
AQP4	0.973864	0.785836
SOWAHA	0.845651	0.261599
PGC	0.939704	0.360939
ARHGDIG	0.83536	0.149554
TMEM229A	0.900227	0.587881
ACER2	0.743617	0.303526
SLC41A2	1.08511	0.677321
SMPD3	1.12791	0.4939
SULT1B1	0.766816	0.0382685
CKM	0.976846	0.88932
CMTM4	0.850909	0.589259
CDH17	1.03655	0.752498
GC	0.946952	0.761106
HDC	0.921381	0.565635
MUC5AC	0.933687	0.361019
CHIA	0.587658	0.0789769
PDGFD	1.29705	0.275317
JADE1	0.774651	0.445868
CYP2C8	1.07515	0.601327
NBPF12	1.36722	0.334341
DEPTOR	0.822045	0.320205
PNPLA7	1.23485	0.274152
C2orf72	1.08061	0.616953
RHOU	1.52843	0.0367929
NKX6-2	1.15665	0.296044
TNNC1	1.05699	0.757041
SLC44A4	1.10896	0.320264
GKN1	1.03207	0.727069
KL	1.08144	0.685612
GPRC5C	1.33004	0.0623788
PEBP4	0.945897	0.706626
RGN	1.25635	0.134939
MT1G	0.912554	0.418507
PTGER3	1.07629	0.646747
ARHGEF38	1.29067	0.147697
C9orf152	1.17672	0.166466
PRDM16	1.15243	0.250526
REG1A	0.949694	0.507173
UGT2B15	1.03562	0.771558
ANKS4B	0.937568	0.65865
HMGCS2	1.04919	0.537266
MYO7B	1.25093	0.15492
SERPINA4	0.900666	0.415415
P2RY14	1.24373	0.217882
PTGER2	1.01832	0.905574
ERO1B	1.27419	0.216371
GRIP2	0.977067	0.889094
RAB11FIP2	0.7143	0.468224
PGA5	1.00329	0.973955
MAGI1	1.00763	0.978258
GJB1	1.02063	0.862478
HID1	1.26769	0.152974
CLCNKA	0.98935	0.951881
ST8SIA3	0.645449	0.112385
AC009163.2	1.28215	0.502591
DCAF12L1	1.04038	0.873582
FGD4	0.770918	0.240669
PRR26	1.04245	0.774489
PLIN5	1.06461	0.649003
GPT	0.747012	0.0732449
SLC39A5	0.908517	0.600268
MUC13	1.00482	0.958201
CFC1	0.885217	0.819304
PALM3	0.863632	0.182613
REPS2	1.01526	0.923461
CA4	0.985658	0.92562
LRRC31	0.981127	0.870579
SIDT2	0.616088	0.216401
PRR15L	1.24815	0.0863595
PDIA2	0.768735	0.0409938
LIPF	0.962722	0.637566
SLC43A1	0.854684	0.342611
VIL1	0.999907	0.999419
ME3	1.12468	0.485022
GATA5	0.958726	0.74042
F10	1.05088	0.820328
KRT20	0.892316	0.184092
CLCA1	1.05452	0.744259
TMEM238L	1.18472	0.112174
CAPN8	0.810968	0.0736967
AGR3	0.865688	0.147907
GAL3ST1	1.05572	0.701489
CARNS1	0.981715	0.939089
ORM2	1.03327	0.817542
C4BPB	0.921778	0.560508
DUSP19	0.769574	0.361539
AHCYL2	1.42054	0.228415
HTR1E	1.06631	0.762936
ZNF69	0.994447	0.971909
PIP5K1B	0.959816	0.770767
CLRN3	1.10081	0.510167
HHLA2	0.880674	0.265895
GNMT	1.21627	0.185569
KCNA5	1.05676	0.661948
ASXL3	0.845342	0.25108
PPP1R36	0.730846	0.0864001
CELA3B	1.01431	0.934005
LIFR	0.872305	0.197473
ADAM28	1.01188	0.932071
LRRC2	0.879928	0.29038
PDZD3	1.00439	0.982458
PGA4	0.828422	0.592701
RAP1GAP	1.3057	0.147824
ENAM	1.06088	0.593794
AVPR1B	0.798965	0.315138
FAM107B	1.13939	0.56103
SLC3A1	1.03123	0.847431
PM20D1	1.13875	0.329022
NR2F2	0.60552	0.0261807
FXYD4	0.986874	0.907653
PPP1R14D	1.12548	0.599463
SCTR	0.989386	0.932069
ADH4	0.794419	0.168369
PLIN1	1.30518	0.199443
GUCY2C	0.846178	0.368674
OTC	0.894452	0.598207
UNC5CL	1.13863	0.503525
AC011498.4	0.912666	0.533228
MUC17	0.921372	0.265615
CCKAR	0.919758	0.523327
MEP1A	1.04071	0.766273
BTNL3	0.994858	0.969513
ANO7	0.786768	0.358698
MUCL3	0.958835	0.554367
TMEM82	0.788606	0.195418
GPD1	1.00957	0.961822
CA1	0.843671	0.315672
FA2H	1.08191	0.527269
ACACB	1.10652	0.525187
RFLNA	0.922781	0.413737
LEPR	1.19993	0.282567
KCNJ3	1.05983	0.599141
VIP	0.976367	0.857177
CIDEC	1.03269	0.797404
APLP1	1.15659	0.290433
PLEKHA6	1.12881	0.354983
NCMAP	0.947845	0.639444
ADH6	0.858759	0.440295
USH1C	0.974246	0.792205
CKB	0.848313	0.24527
VSTM2A	0.936299	0.675969
GSTM5	1.06756	0.738883
CHAD	1.0898	0.520511
ITLN1	0.967131	0.800674
SGK2	1.04074	0.71085
RORC	1.07568	0.496721
SI	0.867513	0.212926
ITGA8	1.12136	0.397852
PLA2G1B	1.33408	0.06158
TMC5	0.930696	0.577805
TPH1	0.876129	0.435297
FABP1	0.936367	0.597637
ALDH6A1	1.04142	0.888596
ONECUT3	0.808273	0.121597
MECOM	1.00455	0.977042
MLPH	1.21845	0.0783032
CADPS	0.869399	0.369411
ETNPPL	1.02012	0.86354
BCAS1	1.04487	0.652542
TSPAN12	1.04107	0.815678
ARRB1	1.14354	0.536603
RAB17	1.18036	0.161502
SLC18A2	0.945788	0.791201
SPINK4	1.09132	0.538787
ERN2	1.04088	0.662773
ATP8A1	1.13725	0.413489
SEMA4G	1.01345	0.941709
TMPRSS2	1.0105	0.909108
PTF1A	0.783551	0.336925
ARHGAP18	1.14426	0.687393
NECTIN3	0.706214	0.043529
SLC9A4	0.914155	0.351135
APOA1	1.06031	0.710564
TFF1	0.996672	0.960052
FAM47E	0.979818	0.890047
KLF15	1.09057	0.404291
ADIPOQ	0.88657	0.528932
UBL3	1.08035	0.80636
SLC12A2	0.772254	0.263796
SCG3	0.990104	0.927075
HRH2	1.20752	0.266375
REP15	1.09692	0.593578
STS	1.00668	0.981919
GLYCTK	0.955346	0.879355
PRSS1	0.969824	0.764106
PIGR	0.957735	0.490489
CLDN23	1.49243	0.0503832
SLC9A3	0.957543	0.667064
SYTL2	1.21065	0.358767
ENTPD8	1.13336	0.301966
GCNT1	0.78684	0.288832
ODAM	0.941569	0.493404
PDK4	1.10093	0.344119
TMEM100	0.925509	0.552422
RCAN2	1.07942	0.672684
CYP3A5	1.04072	0.736287
GCKR	1.06224	0.644398
DCDC2	1.1279	0.347097
CLDN2	0.837278	0.31031
ADGRD1	0.921908	0.521674
REG3A	0.980791	0.845961
SH3GL2	1.01525	0.879796
GMDS	1.0596	0.84925
JCHAIN	1.10382	0.337686
ATP2A3	1.31966	0.146793
CREB3L1	1.19889	0.249184
SAMD13	0.942794	0.698614
GBGT1	1.00798	0.965781
CTXND1	1.0454	0.6993
VIPR2	1.09048	0.473273
NEUROD1	0.98896	0.93527
PGA3	0.990322	0.91899
ACSM1	0.997537	0.990313
SLC6A20	0.892095	0.371818
KBTBD12	1.02996	0.785863
MUC1	1.08037	0.541875
CELA3A	0.907646	0.640988
SNTB1	0.967098	0.870187
SCGN	0.866618	0.430951
CLMN	0.607238	0.0313033
RNASE4	1.56664	0.0266778
CACNA2D2	1.23219	0.236515
SCUBE2	0.939166	0.645522
SERPINA1	1.11401	0.375533
SYT13	1.01039	0.907395
ADRA2A	1.01219	0.916997
KIAA1958	0.655592	0.141531
FAM177B	1.33089	0.109053
TDGF1	0.873419	0.37053
FAM174B	1.37315	0.0787154
PTPRJ	1.17098	0.554984
NSG2	1.26235	0.111353
GATA4	0.946448	0.434125
REG4	0.920213	0.252563
MT-ND6	1.18532	0.479837
TTR	1.14999	0.288513
TMEM151A	1.11303	0.412697
SLC17A4	1.07467	0.69862
A4GNT	0.914776	0.463773
FZD4	0.863478	0.52459
PLEKHB1	1.13526	0.427857
FMOD	1.02599	0.878927
ARSD	2.48734	0.0110203
RIMS4	1.13975	0.203381
MTURN	1.33601	0.192745
ADCY6	1.00972	0.96837
INSRR	0.902323	0.568479
TFR2	0.937211	0.668652
OSBPL7	0.956627	0.804849
GALNTL6	0.860244	0.399168
ALB	1.02791	0.817059
ATOH1	0.888603	0.565569
SV2C	1.06258	0.736495
COL2A1	0.95494	0.618684
RBM47	1.13221	0.671057
TENT5C	1.06529	0.66633
KLHL41	1.04445	0.762488
SLC16A7	1.11135	0.450235
TRIM74	0.971135	0.866036
ARFGEF3	1.1195	0.358828
NEUROG3	0.965709	0.849823
LCN10	0.851773	0.249582
MS4A8	1.05805	0.587079
ADH1A	0.856838	0.315386
TREH	0.936515	0.642322
FNDC5	0.917829	0.555229
ZNF385B	0.978022	0.809073
BCL2L14	1.16224	0.310838
MT-ND5	1.20891	0.476465
LYZ	1.10342	0.476347
ATP8B1	0.890299	0.588456
ITIH3	1.12461	0.492979
PAQR8	0.891592	0.496703
ITIH5	1.20075	0.235182
CRACR2B	1.00398	0.980297
C2CD4B	1.15999	0.209813
HNF4G	1.04173	0.711058
RAB3C	1.03418	0.761894
EPHA5	0.976557	0.8207
SELENBP1	1.04556	0.701195
PGPEP1	1.20928	0.430775
ANG	1.75934	0.00234915
RNF186	0.867199	0.391747
DPEP1	0.968583	0.827204
NTN4	1.00897	0.963505
AATK	1.06476	0.786975
RALGAPA2	1.27048	0.270471
FUT4	0.513709	0.0105666
ANKRD40CL	0.804994	0.18633
CAPN5	1.03002	0.846824
AC026464.1	1.12956	0.700921
SHROOM3	0.858087	0.197288
ATP7B	1.19218	0.455957
RGMB	1.50156	0.109659
KIT	0.89146	0.454768
ARSE	0.912206	0.530431
HPN	1.00452	0.958536
PIK3C2G	0.896009	0.210224
TCEAL6	1.07692	0.704891
FAM107A	1.03687	0.763495
GOLM1	1.0571	0.79893
RFX6	0.907448	0.457982
MBOAT4	1.0891	0.749353
LPIN2	1.22629	0.376294
PLA2G10	1.14844	0.385494
CAB39L	1.02296	0.924855
SMIM32	1.15058	0.32859
METTL7A	1.12652	0.40024
FAM189A2	0.926122	0.465149
APOH	1.01362	0.911756
GREM2	0.931401	0.525017
KCNJ16	1.0815	0.295776
PIRT	0.927876	0.586113
CFAP221	1.00257	0.981008
AQP2	0.781543	0.180299
FAM19A2	0.997001	0.9888
PXMP2	0.987979	0.971515
RGL3	0.982561	0.879344
XK	1.09393	0.48925
SRRM4	0.96848	0.837076
ADCYAP1R1	1.104	0.458796
MUSK	1.20891	0.203577
NAT2	1.0165	0.920694
VAT1L	0.822252	0.260392
CFTR	1.01288	0.894185
CALY	1.06411	0.684679
SORBS2	0.972226	0.830329
PDE1B	1.38719	0.0795391
C6orf201	0.897613	0.538645
COQ8A	1.00966	0.964969
TRIM36	0.95891	0.808169
TMEM220	0.688438	0.0381036
ZBED3	0.737484	0.141061
MUC6	0.846674	0.0534003
KALRN	1.1642	0.395015
FABP2	1.00276	0.989718
CCDC110	1.14289	0.392004
C6	0.947771	0.613273
DSCAML1	1.03647	0.818882
PRAP1	1.09535	0.462278
DDAH1	0.861104	0.394042
SLC44A3	1.11498	0.518293
GMPR	0.908244	0.407925
MYORG	1.02226	0.90731
LAMA2	0.745233	0.106068
CHRNA7	1.18122	0.155005
ABCG8	0.801146	0.137887
CLCNKB	0.784447	0.178215
SP5	1.08934	0.409291
RETREG1	1.04409	0.773086
KBTBD11	1.17579	0.331343
RBPJL	0.900849	0.483809
GALNT12	1.14336	0.484785
DPT	1.01652	0.893576
TRNP1	1.04623	0.780629
SLC25A4	1.54556	0.0603936
DNALI1	0.939636	0.725609
CNTN3	0.913077	0.425043
HPGD	0.988708	0.91181
WIPF3	0.96908	0.76591
CHDH	0.956294	0.701848
GOLT1A	1.22844	0.0815009
PLLP	0.977612	0.907628
ARHGAP44	1.14657	0.516181
KIF19	1.00829	0.955743
ANPEP	0.855338	0.295126
SLC16A10	0.791021	0.202848
AZGP1	1.03102	0.680963
PKIB	0.973704	0.878562
SLC26A9	1.08235	0.32348
RHPN2	0.742311	0.148003
ROR1	0.969466	0.821023
RAI2	1.22987	0.22542
MAGIX	1.29926	0.257731
IFI16	1.33076	0.453389
ENPP4	1.26688	0.0641988
FGA	0.993524	0.937999
GSTA2	1.1066	0.217102
TMEM211	0.938274	0.621452
CREB3L3	1.09988	0.525863
MYMX	0.845913	0.319929
GUCA1C	0.904313	0.485975
SULT1C3	0.866871	0.577804
LRIG1	1.07212	0.67226
ST6GALNAC1	1.03788	0.702794
BIRC5	0.845561	0.526205
FOXA2	0.814083	0.0428099
DMBT1	0.944226	0.342875
SNAI3	1.74242	0.0285688
PIWIL4	0.670255	0.0514941
DUSP4	0.862913	0.291739
PSAPL1	0.92042	0.333258
TRIP13	0.686053	0.0628733
NFATC2	0.986595	0.944506
SYNE1	0.926159	0.670226
HPR	1.47142	0.0799051
NRM	0.858256	0.660754
SRL	1.17234	0.362467
MMP11	0.949282	0.649759
GLYATL1	0.99787	0.985877
PKHD1L1	0.950504	0.652335
PLAU	1.06727	0.715623
AMBP	1.08098	0.563119
KCNH7	0.959097	0.803612
LCN6	1.04227	0.782635
PTPRB	0.958794	0.855953
RAB37	1.34913	0.174661
VEGFD	1.15801	0.345029
CYFIP2	1.29407	0.0223539
SERPIND1	1.2123	0.319443
C2orf40	1.09132	0.283462
KCNK2	0.884897	0.252242
KCNH6	1.10342	0.489963
FABP3	1.48909	0.0417944
SEC14L5	0.921249	0.704286
NME5	0.985716	0.909613
TOX3	0.992564	0.926051
KIAA0895	0.817727	0.374009
TRIM73	0.794457	0.381637
CKS1B	0.781478	0.384491
GPR17	1.07723	0.597589
ARHGAP6	1.17107	0.400627
ZC3H12B	1.02767	0.866815
SYT4	1.0335	0.79628
C3orf18	1.27566	0.20227
CDCA4	0.610604	0.13094
ZNF540	1.07183	0.680856
TMEM132C	0.920773	0.473374
AXIN2	1.14787	0.422856
KCNK16	0.707844	0.474368
ORM1	1.16696	0.223638
CHKA	1.00138	0.994791
SYNPR	1.03251	0.808731
C1QTNF7	1.13191	0.356658
C15orf65	1.87433	0.0175862
SLC19A3	1.00468	0.97203
GLOD5	1.00869	0.95467
WNK4	0.983737	0.888438
C17orf53	0.746214	0.247402
UBE2S	1.20599	0.552153
ANXA10	1.14447	0.0537997
CNDP1	1.09659	0.596671
DNAJC22	0.986555	0.913627
CCL15	1.12538	0.54469
SYBU	1.00631	0.948434
RGS7	0.77557	0.126638
GATM	1.17799	0.219386
KCNJ10	1.11759	0.51267
NUDT1	0.836745	0.520069
DNER	0.910474	0.311412
GABRG1	0.674914	0.108157
EME1	0.648107	0.0712732
SLC26A3	0.994888	0.968017
F2RL3	0.758309	0.284923
KIF23	0.658346	0.0770563
TMEM125	1.32019	0.048096
KIF20A	0.785299	0.336024
WDHD1	0.546575	0.0426124
KCNK5	1.21935	0.18783
PAIP2B	1.19711	0.393243
XPNPEP2	1.00763	0.940626
KLHL32	0.952729	0.758902
MUC3A	1.03777	0.766489
GPT2	1.44064	0.136441
TNXB	1.01355	0.894305
ACSM5	1.18025	0.214537
TRPM3	0.90282	0.430974
SLC1A1	0.996799	0.981388
HEPACAM2	1.05482	0.693868
HSPB6	0.95821	0.710704
CHRM2	1.04216	0.747067
GPR160	1.38917	0.0369369
PDE4C	1.16062	0.289283
ZBTB16	1.0481	0.608139
PTPRH	0.934508	0.582347
FRMD3	1.0784	0.698479
GALNT4	0.980137	0.913053
SMIM31	1.08228	0.51093
ABCA8	1.10592	0.323662
RECQL4	0.589404	0.0639151
TMEM171	1.21862	0.196365
STMN2	0.92138	0.484274
PDX1	1.35144	0.0181304
TDO2	1.03404	0.853997
ABCG5	0.982129	0.918594
SLC18A1	0.781976	0.188107
ABCC6	1.13999	0.546283
MASP1	1.02216	0.852108
ORC6	0.926761	0.788032
FAM180B	0.956169	0.81242
UNC5A	1.04307	0.771175
SYP	0.937197	0.765697
MYL4	1.09396	0.663468
FAIM2	0.953167	0.716815
GPRC5B	0.861061	0.299559
CGN	0.872674	0.437289
SH3BGRL2	0.958724	0.722334
ATOH8	1.18165	0.210981
LIPH	1.05906	0.694156
ICA1	1.01306	0.908895
PPARG	1.01274	0.921871
GPRIN3	1.03253	0.875206
TK1	1.07396	0.761578
HNMT	1.40419	0.104897
MFAP2	0.83043	0.228804
KCNJ11	1.02426	0.822776
KIF18A	0.671252	0.039178
ABCC12	0.741272	0.151234
FAM149A	1.01532	0.892882
RGS5	0.988691	0.956366
FRMD1	1.0661	0.487386
PPP1R9A	1.06345	0.474874
FAM110D	1.18709	0.374857
KAZALD1	0.94993	0.810995
MMEL1	1.02691	0.864788
NUF2	0.790692	0.257272
ABCC8	0.885686	0.260012
KIF2C	0.735597	0.236898
CLEC3B	1.06854	0.649865
RANBP3L	0.947855	0.568169
PARD3B	1.11043	0.484369
PRKN	1.05259	0.776539
ASPA	1.0629	0.614959
VWA7	0.966075	0.863014
SLC40A1	1.74066	0.0106208
ERBB4	1.00488	0.957471
HGD	1.29847	0.017782
P2RX2	0.938746	0.627095
UBE2T	0.874146	0.649465
TPX2	0.614475	0.0257444
RFC4	1.02418	0.925805
PLAC9	1.18411	0.38023
AURKB	0.788303	0.322041
KIF13B	0.962096	0.840269
MT1F	0.875311	0.389622
NR3C2	0.970409	0.796436
PIFO	0.960784	0.761851
CCDC154	0.984696	0.925841
MT1H	0.928224	0.512995
FAM221A	1.1252	0.398448
PROK1	0.816201	0.359473
CCNB1	0.854343	0.596261
ADAM33	0.970514	0.869876
CFD	1.11201	0.40277
MGAT4A	0.998476	0.992621
CFAP99	0.988892	0.951925
GDF9	1.1659	0.536369
EPB41L4B	1.11151	0.623608
KRTAP4-1	1.36112	0.0234858
MYOC	1.04816	0.487564
B3GNT7	1.16717	0.356447
WFDC1	1.10902	0.571133
MISP3	1.18814	0.290218
PKMYT1	0.920491	0.741746
FZD6	1.15747	0.548159
LONRF3	0.949296	0.661766
KIF14	0.653943	0.039573
AR	0.784064	0.177762
AOX1	1.1144	0.393271
VWA5B1	0.879786	0.439097
CYP3A4	0.962728	0.819655
RERGL	0.909752	0.4726
HOXD9	0.912312	0.657195
AL163636.2	1.29552	0.266293
RGS11	0.949638	0.688688
ALDH3B1	1.06989	0.693535
TROAP	0.896802	0.677455
AMER3	0.815341	0.253789
GPHA2	0.991632	0.957235
ADAM12	0.984463	0.91023
GLP1R	1.15093	0.22712
NMRK2	1.0604	0.735884
CDC45	0.672296	0.0861804
RASEF	1.10558	0.484917
PTGFR	0.739726	0.11414
CDH24	1.02953	0.909281
DDI1	1.0226	0.887919
AGR2	0.966382	0.723874
MT1M	0.925131	0.407884
GCNT3	1.01218	0.907605
SMPDL3B	1.00146	0.990687
SLC5A9	1.12197	0.32257
ANO5	0.991668	0.929348
CDC20	0.874992	0.607657
HMGB3	1.23956	0.357156
MTRNR2L1	0.961215	0.828083
RPL39L	1.15442	0.442519
RSPO2	1.00073	0.993798
GNGT1	0.734409	0.0544502
SCARA5	0.970306	0.691926
TEDC2	0.797971	0.356476
ACADL	1.04982	0.578167
OGN	1.04038	0.719707
LAMP3	1.00715	0.967498
CAPZA3	0.630872	0.0297191
TJP3	1.0706	0.513615
CABP1	0.970689	0.857976
PRLHR	0.959771	0.845697
CYP2B6	1.06135	0.621789
CENPA	0.757062	0.266833
CDKN3	1.04562	0.876344
KIAA1324	1.06318	0.45628
CDK1	0.794916	0.390169
E2F7	0.777504	0.169134
KIF18B	0.799036	0.373293
DLGAP5	0.552014	0.0183501
SGSM1	1.19367	0.128487
SNAI2	0.900498	0.57669
RSPH1	0.975453	0.859826
MFSD6L	1.27486	0.075095
FRMD5	0.961759	0.805447
TRARG1	1.21952	0.21859
LIPJ	1.01774	0.892143
C10orf55	1.01288	0.94747
C20orf85	0.760158	0.320406
CDHR3	0.797052	0.229959
CDH2	0.959489	0.735049
SNAPC1	1.28916	0.441722
FBP1	1.15769	0.263986
C1orf210	1.23611	0.258429
TYMP	1.19083	0.221709
TMEM72	0.826515	0.230601
CHRFAM7A	1.28005	0.101366
COL10A1	0.939525	0.470147
DEPDC1	0.73541	0.116456
INPP5J	0.890082	0.441236
LY6E	0.945916	0.764899
COL14A1	0.916724	0.576746
ANXA13	0.976598	0.868112
NEK2	0.725073	0.181643
RNASEH2A	0.865581	0.622204
APOBEC1	0.918688	0.551169
STMN1	1.09105	0.724139
CGB7	1.16652	0.479596
KCNK3	1.13476	0.332866
CSRP3	0.9395	0.776631
CFAP46	0.948442	0.690629
NCAPH	0.73931	0.100024
OMP	0.912294	0.684916
FSCN1	0.893044	0.575054
GABRA3	0.820685	0.0468355
SEMA3B	0.819398	0.16039
RASSF6	0.913624	0.521941
CDC6	0.764539	0.230843
MCM10	0.702855	0.0772691
TAC3	0.795932	0.171739
CUX2	0.936167	0.540661
SLC9A2	1.00744	0.93584
WDR72	0.819379	0.198531
UGT2A3	1.05799	0.616848
ADAMTS8	1.07547	0.444677
OLFM4	0.935592	0.288503
UBE2C	0.879874	0.622335
TM4SF4	1.0659	0.65201
CDCA5	0.678352	0.085283
SLAIN1	1.05074	0.646646
CKAP2L	0.719461	0.140599
EXO1	0.776665	0.217959
NUSAP1	0.809519	0.315277
RAD54L	0.854272	0.489738
SLC13A2	1.06113	0.636312
MSLN	0.858902	0.132765
KIF4A	0.836754	0.455078
TMEM56	0.880049	0.287971
DEPDC1B	0.712434	0.165821
MAD2L1	0.756023	0.291797
ARX	1.0943	0.474408
NDST3	0.894382	0.397596
ULBP2	1.22634	0.204794
KLF9	0.946083	0.775552
DTL	0.769346	0.211823
NTF4	1.10147	0.692702
SYPL2	1.11201	0.533231
CBX2	1.24996	0.183416
CD300LG	1.06755	0.638166
ENPP1	0.847264	0.320192
SLC1A7	0.9732	0.840545
GCNT4	1.15605	0.377332
PROM1	0.87749	0.113634
GALR1	1.10068	0.454705
CCBE1	1.01436	0.906544
GINS1	0.920202	0.721948
DNMT3B	1.01595	0.94767
CPED1	1.02185	0.883588
TNFRSF11A	0.953966	0.812826
PDE2A	1.27421	0.159047
TTLL6	1.08082	0.528018
PRRG3	1.13085	0.315651
B3GNT3	1.01051	0.925291
SMIM11A	0.699401	0.147123
TNFRSF18	0.806949	0.110151
ACSM6	1.04208	0.751442
GRAMD1B	1.01543	0.884139
MADCAM1	1.07851	0.694946
PROCA1	0.86743	0.60084
CGNL1	0.972127	0.80381
CMA1	1.00695	0.957661
PACSIN1	1.13267	0.275687
ECT2	0.901366	0.639832
C4orf19	1.00256	0.980374
MAP1LC3C	1.10365	0.48194
CENPE	0.64947	0.0526788
PTCHD1	0.95001	0.617422
ANLN	0.765417	0.127035
HSPB9	1.11696	0.723352
ABI3BP	1.12082	0.269099
NPR1	1.14261	0.447637
SPP1	1.13094	0.216266
AFM	0.946104	0.760954
LONRF2	1.05433	0.500323
EFCAB12	0.869331	0.468728
NMUR2	0.952306	0.678658
PTTG1	1.10397	0.738796
CKS2	0.912124	0.732546
LDHD	1.27682	0.0633645
CENPW	0.965939	0.873841
PTK7	0.817174	0.481265
MCM7	0.702935	0.13172
BUB1B	0.684717	0.0917992
KRTAP3-2	0.954992	0.706304
PHYHIP	0.846217	0.232855
CIP2A	0.695778	0.0570876
TICRR	0.830898	0.403671
GINS2	1.20437	0.410934
SNX10	0.965177	0.862149
CADM2	0.972648	0.735308
CENPF	0.785071	0.181253
FER1L6	1.03445	0.71179
FHL5	0.991421	0.957413
CADPS2	0.883919	0.445222
XRCC2	0.7605	0.110427
ADAMTS12	0.88105	0.355228
SHCBP1	0.949517	0.835196
HSD3B2	1.10718	0.584273
TP63	1.1601	0.443906
COBL	1.0889	0.384722
MYO5C	0.921474	0.548553
MOGAT3	0.993632	0.965371
MYZAP	1.06695	0.57159
GPRASP1	1.08232	0.654646
ASPHD1	0.952475	0.808644
CXCL17	1.13426	0.142712
ADCYAP1	0.943212	0.575607
PRRX2	0.946537	0.767168
SLC4A1	1.00347	0.979377
CARTPT	1.04626	0.678893
GPR20	0.856612	0.404391
CDX1	0.942005	0.713135
CCL25	1.12769	0.424181
MCM2	0.798711	0.255201
CEACAM18	0.906866	0.684198
TOP2A	0.75929	0.125641
COL7A1	0.889821	0.620671
CA3	0.896712	0.389842
TUBA3C	1.08742	0.57388
G0S2	1.00344	0.979563
BUB1	0.647984	0.0375608
ERICH4	1.03068	0.88222
CDT1	1.01357	0.960407
CPM	1.45439	0.0595804
ADRA1A	0.979812	0.86544
COL11A1	0.928108	0.360915
PIMREG	0.819534	0.335004
HIF3A	0.987159	0.878155
SEC14L6	1.00937	0.950295
CCNB2	0.925997	0.749486
GDAP1L1	0.923729	0.617066
HOXD10	0.952152	0.69351
AMPD1	0.955385	0.729902
GNG7	1.10535	0.425377
CEP55	0.777374	0.289288
SLC7A14	0.949394	0.620215
NMUR1	1.18758	0.246365
MACROD2	1.02802	0.863523
PLA1A	1.06426	0.678543
PKDCC	1.10785	0.303359
MOGAT1	0.878757	0.443809
ASPM	0.693454	0.0629513
HTR1B	0.795936	0.176658
DUSP9	1.02964	0.85279
FOXM1	0.793312	0.275285
EN1	1.05913	0.459785
TMEM132D	1.05908	0.713261
CTHRC1	1.01058	0.940046
DDIAS	0.7451	0.11332
RAD51	0.817456	0.409659
PCDH11Y	0.946042	0.710314
NCAPG	0.689433	0.127197
CDH3	0.952196	0.800741
PLCZ1	0.851229	0.209212
HOXD11	0.975664	0.835492
ITM2A	1.06566	0.719012
PRR11	0.547581	0.0097696
TMPRSS3	1.07987	0.485019
HEPH	0.961916	0.817575
PF4	1.06229	0.675795
ISX	1.30976	0.0935968
LYVE1	0.991528	0.94929
TOX	0.928115	0.530089
NXPH4	1.15335	0.372356
ADGRG2	1.01463	0.892236
MUC2	0.889914	0.165651
SPDEF	1.00821	0.919192
COL4A3	1.0965	0.39929
SIGLEC15	0.982357	0.916239
TNFRSF17	1.29158	0.103607
FBXL13	0.897428	0.45001
DUSP26	1.20021	0.238665
MELK	0.726943	0.223265
PRLR	0.943482	0.537752
SIX1	0.938966	0.602281
MYBL2	0.838783	0.443075
TPSG1	0.97801	0.875614
SYCP3	1.03087	0.80178
NDC80	0.832969	0.415998
KLHDC7A	1.01264	0.890644
AFF3	1.02273	0.82991
ORC1	0.750696	0.197677
PLS1	0.868263	0.375557
FCGBP	1.03145	0.759965
EPOP	0.920221	0.726862
SVOP	0.848872	0.30286
FOLR1	0.998082	0.977575
RBPMS2	1.07689	0.526323
FAM3B	1.0898	0.232891
SKA1	0.612038	0.0387831
KLHDC8A	0.937318	0.682497
RD3	0.923023	0.685559
B4GALNT1	1.012	0.912175
SPACA4	1.09588	0.508731
ESM1	1.00811	0.95861
PDE1C	1.00235	0.986601
IL11	0.849431	0.225195
AKAP12	1.01428	0.921913
CENPI	0.853027	0.495444
PBK	0.627698	0.0312494
PRSS33	0.805324	0.180319
FXYD1	1.05193	0.756844
LIPM	1.39908	0.0315334
FHL1	1.0832	0.52222
CCDC68	1.08589	0.443558
GGT1	0.953035	0.758168
CTH	0.758922	0.125196
F11	0.917515	0.530189
UBXN10	0.940725	0.560521
DLX4	0.908938	0.608712
WSCD1	0.996531	0.983236
CRISPLD2	1.11665	0.553832
PMAIP1	1.10884	0.691447
ISM2	0.86155	0.249889
TRPC5	1.04601	0.79396
PI16	1.04076	0.605889
KCNA10	0.74557	0.270564
FGG	1.09783	0.22742
ACTN2	1.02796	0.818412
FZD2	0.878412	0.485383
SCG2	1.13949	0.324859
GPRIN1	1.19586	0.280128
ST6GALNAC2	1.15917	0.458476
FAM135B	0.966421	0.754256
SKA3	0.666878	0.113396
TRIM31	1.15928	0.233565
POLQ	0.771846	0.182216
TRIM40	1.10533	0.434474
GAS2	0.937882	0.504281
LGI1	0.909056	0.407604
CDC25B	0.777743	0.265511
ACSL5	1.18429	0.170856
DOK7	0.970896	0.822468
GFRA2	1.4327	0.0186741
WNT3	1.10014	0.621051
STC2	1.33177	0.0575461
ABCA9	1.10949	0.419234
GRIN2B	0.923693	0.585229
SPERT	1.3324	0.0219734
GLP2R	1.13626	0.200679
LINGO4	1.12429	0.306403
HOXD13	0.983916	0.820913
RBP1	0.878321	0.393962
PCDH9	0.82793	0.0804487
PAK3	0.963868	0.690446
TEX49	0.869503	0.480088
MMRN1	1.0194	0.859121
ULBP1	1.03477	0.770957
ARL14	1.00779	0.9331
CYP17A1	1.43156	0.0183467
NOX4	1.12145	0.520461
KCNK15	1.17951	0.140813
TSPAN1	1.09419	0.388818
SERPINH1	0.855527	0.436706
PBOV1	0.850528	0.388042
ENPP3	0.772372	0.0398387
SPINK13	1.01817	0.89362
C1QTNF6	0.812169	0.174502
S1PR5	1.23187	0.308856
MAPK12	0.952102	0.799781
KIF12	1.09078	0.488182
ZMAT1	1.03762	0.752785
DPP10	0.947261	0.565462
CLDN1	1.53247	0.0332215
TGFBR3	0.901861	0.369498
BHMT	0.995435	0.969471
WDR66	0.951183	0.741733
CDX2	1.1101	0.188703
NEIL3	0.864615	0.414227
MS4A2	0.916524	0.502297
B4GALNT2	0.961887	0.583006
SBSPON	0.880366	0.271849
MELTF	0.880455	0.359866
NDNF	0.920755	0.543458
PPP1R1A	1.00239	0.980581
DLX6	0.96363	0.65138
PRSS2	0.988993	0.892982
MEDAG	1.05334	0.746933
PODN	0.992183	0.95438
ERVMER34-1	0.866191	0.371697
CEP19	0.969664	0.848592
NXF3	0.868243	0.392625
RETNLB	0.865598	0.315466
KRTAP5-5	0.981945	0.955501
HJURP	0.857357	0.500672
IL1RAP	0.959824	0.847183
IBSP	0.986413	0.919098
MAPT	0.955058	0.77889
INSC	1.09016	0.541142
SLC13A3	0.894775	0.389421
KIAA1549L	0.960519	0.755562
TCTEX1D2	1.24046	0.330916
FEV	1.10101	0.572758
ISG15	1.14033	0.233239
KCNS3	1.07867	0.531469
HMMR	0.844788	0.426341
PDZK1	1.02117	0.904838
PTPN5	0.961655	0.759867
FAM83E	1.03659	0.750154
ADORA2B	0.719933	0.173905
HIST1H1E	1.1107	0.54233
ARSI	1.01038	0.940179
CLEC5A	1.00255	0.989336
CADM3	0.983445	0.857274
MMP17	1.12172	0.485023
PLPP4	0.902838	0.293705
BTN1A1	1.10595	0.562621
EVA1A	1.09125	0.501839
FAM72D	0.826019	0.285843
COL27A1	1.00007	0.99973
RSPO1	0.914744	0.563375
ST18	1.0631	0.630405
SMOC2	1.02431	0.851836
RUNX3	0.864812	0.33955
ABCC9	1.06837	0.656413
MMP13	1.09086	0.259405
SMLR1	0.662707	0.115509
ADGRG5	1.07589	0.546781
AMHR2	0.974363	0.851112
CST1	1.04324	0.582561
GRIN2A	0.978303	0.802689
PCSK9	0.928358	0.539513
GNAO1	1.13811	0.37981
CLEC19A	0.926792	0.676191
STK32A	1.27951	0.0524713
MMP3	0.948137	0.549332
ALPI	0.975884	0.862854
CPNE6	1.0813	0.606093
TMEFF2	1.03133	0.79228
KCNB1	1.02865	0.753063
SPTBN4	1.07517	0.614932
CXCL8	1.12343	0.311651
OLFM2	0.904636	0.485589
MND1	0.762121	0.237772
HIST2H2AC	1.18838	0.390652
TNNT1	1.03635	0.728095
PRKCG	0.920331	0.599923
CHST1	1.03127	0.777283
TRPC7	0.953441	0.824077
GNAZ	1.13204	0.271114
PLCH1	0.839911	0.150555
RAD51AP1	0.871736	0.482434
GINS4	0.734451	0.0454394
FOXS1	1.40185	0.110811
FAM72B	0.647461	0.0227197
ADGRG4	0.9734	0.853324
FOXL2	1.02196	0.776234
KCTD8	0.865765	0.23736
FGF10	0.973176	0.794754
SYCN	1.16804	0.351491
ERFE	0.99184	0.960707
CA9	0.98024	0.763897
MAS1L	1.02927	0.900269
P2RX1	1.06548	0.636783
GPR176	0.82639	0.17437
TNFSF10	1.82458	0.000959423
TMEM139	0.795252	0.0905739
CDH13	1.18859	0.310321
GABRB3	0.999145	0.991738
CAPN13	1.00188	0.977205
COL24A1	0.945653	0.734582
TCEAL2	1.03802	0.682172
ICAM5	0.772213	0.0311408
TREM1	1.10814	0.324373
FJX1	0.881115	0.594673
LTK	0.910174	0.474493
GABRE	1.12495	0.404814
GRIA2	1.01742	0.865702
BEND6	0.787557	0.144035
NPY	0.881726	0.31498
S100A7A	1.02395	0.698794
ALG1L	1.2895	0.136136
CTNNA2	0.973517	0.806919
BEND7	1.11623	0.365012
G6PC2	0.740621	0.183693
FSIP2	0.971895	0.785951
MAATS1	0.997945	0.980569
LRRC52	0.829514	0.536387
DRGX	0.950186	0.794916
S100A7	1.01244	0.845627
ABCA6	1.07269	0.646082
TMC3	1.01062	0.950556
CA2	1.04491	0.625032
C12orf54	1.10757	0.379901
GP2	0.932986	0.428897
GPR50	0.965349	0.628926
MGAM2	0.980019	0.825169
HOXC13	1.27807	0.167329
TREM2	1.17982	0.307948
MTTP	0.99551	0.970858
AC091167.6	0.960083	0.84854
C7	1.00899	0.888738
MMP12	1.12338	0.264951
FAM47E-STBD1	0.803455	0.320434
HES4	1.18653	0.328723
ANK2	0.991482	0.943149
ALX1	1.0341	0.663095
VWA2	0.853706	0.0966747
TMCC2	1.06383	0.718061
SVIP	0.999215	0.994838
SLC2A12	0.959602	0.715524
NWD1	0.896906	0.29603
UMOD	0.881102	0.521905
CIB4	1.02224	0.900888
SCN4A	0.985313	0.906634
HMCN2	0.943761	0.656651
RAB9B	1.14688	0.238121
PLA2G12B	1.03006	0.870709
GDF7	1.10923	0.435988
GPC1	1.24107	0.252974
HS6ST2	0.880393	0.105173
PHOX2B	1.0612	0.677515
UCN2	0.974099	0.879582
CELA2A	1.10708	0.531659
DSPP	1.0444	0.772934
DNASE2B	0.901778	0.488703
CYP2C9	0.973374	0.773977
HOXB6	1.08872	0.551063
VAX1	1.04943	0.551164
PPP1R1B	0.907627	0.16987
TFRC	0.823766	0.259527
LHX2	0.875323	0.193097
EN2	1.14231	0.216665
DEFB126	1.00113	0.992081
CCL23	1.15001	0.355045
DEFA6	1.37677	0.109126
TNC	0.870994	0.252187
PRR5L	0.980513	0.905691
GALNT15	0.939828	0.638962
NKD2	0.878906	0.36662
PCK1	1.20594	0.0502986
RGS1	1.08122	0.707159
MMP9	1.00489	0.970303
IL33	1.20124	0.0483672
FGL2	1.09718	0.439596
WNT2	0.959479	0.690997
ONECUT2	0.862985	0.255331
HOXC8	1.07451	0.678791
RBFOX3	1.10097	0.477026
B3GNT6	0.952023	0.527526
SLC4A10	0.960417	0.753687
LRRC26	1.01968	0.815712
ERP27	0.842731	0.177305
NT5C1A	1.07131	0.622992
SCGB2A1	1.10746	0.270635
TM4SF19	1.24852	0.0499684
STON2	1.21713	0.267843
C12orf56	0.982957	0.930007
ISL1	0.846177	0.0739566
SUGCT	0.792238	0.140244
RFX8	1.03556	0.821068
HHIP	0.991364	0.933046
LAMC2	0.864912	0.280083
SP8	0.982985	0.841875
OLR1	0.968478	0.75744
SORBS1	1.08445	0.445507
PODNL1	1.00845	0.960604
FBXO43	0.811826	0.177693
TCHH	1.08068	0.299627
HOXD8	1.03661	0.84675
TMEM45A	0.944119	0.675703
AMELX	1.07448	0.75011
ENPP5	1.01102	0.90239
SHISA3	0.982703	0.852867
TGFBI	1.04692	0.731074
NPBWR1	1.00489	0.957191
CLDN16	1.13659	0.4081
DUOXA2	1.10006	0.355683
GUCA2A	0.845777	0.574698
FBXO39	0.896875	0.43415
RNASE10	1.01151	0.883411
ALDH1A1	1.08812	0.28361
RYR1	0.987956	0.930658
DLG2	0.973634	0.858011
NEGR1	0.992089	0.951577
GALNT16	1.05858	0.618404
SDS	0.93099	0.695953
PTPRN	0.800229	0.0619351
PPFIA2	0.820605	0.105567
MMP10	1.02221	0.77993
PEG3	1.03621	0.805067
FAM198A	1.21038	0.129058
RPRM	0.980461	0.843109
CCNA1	0.986802	0.831619
MKRN3	1.07572	0.661622
ANGPTL1	0.952816	0.605753
XCL1	1.01478	0.923457
GJB7	0.936922	0.568158
GPIHBP1	1.10758	0.469956
HCAR1	0.939389	0.583372
NCAM1	0.972056	0.791783
ADGRB3	0.906428	0.324797
RNF128	1.02649	0.798201
PLA2G7	1.2007	0.312753
HES7	0.805532	0.240109
PTHLH	1.03444	0.700819
GJA3	1.00644	0.943628
TRPM5	0.978319	0.866143
PLCB4	0.910125	0.361269
PTH	0.919829	0.716357
INHBA	0.811993	0.0961246
KRT17	1.15433	0.278876
VWA5B2	1.02906	0.794621
NEXMIF	1.00936	0.912025
HOXC9	1.22579	0.350459
NPY2R	0.963454	0.893692
GPC2	0.845602	0.268283
EPHA10	1.09075	0.467309
CTSC	1.62386	0.00937073
IL20	1.1379	0.232644
GABRQ	0.995511	0.963228
OAS2	1.1181	0.431889
MT4	0.96969	0.856291
F2	0.957735	0.786749
BASP1	1.19361	0.219666
NR4A3	1.04119	0.783897
TWIST1	0.76982	0.102244
VSNL1	1.23231	0.28738
PGF	1.07219	0.57681
CXCL6	1.01147	0.917307
CNTN4	0.985396	0.907262
TMEM26	1.03032	0.865383
HIST1H3B	0.94721	0.712958
TM4SF19-TCTEX1D2	1.52458	0.0158107
ERICH2	0.993588	0.948426
LAMP5	1.00103	0.99295
COL1A1	0.966494	0.777313
RGS7BP	0.977736	0.81111
MYO18B	0.907428	0.267696
TENM2	1.09328	0.333798
PRR15	1.05065	0.641308
KRT9	0.9453	0.664358
APOE	1.22705	0.22489
CASQ2	1.01269	0.896668
CES3	1.05236	0.585321
CCDC33	0.841731	0.229704
SLC47A1	0.979292	0.84237
FAM72C	1.00316	0.98761
PLIN4	1.00603	0.957276
SEMA3E	1.01337	0.884306
GPR142	0.928027	0.596661
PANX2	1.12613	0.259068
PDPN	0.889693	0.396193
ADH1B	1.00906	0.887291
TMOD1	1.12381	0.302984
DPF1	1.15483	0.385894
GABRP	1.09259	0.205912
CLEC7A	1.18325	0.213105
PLA2G2C	1.00904	0.954783
CCDC198	1.10788	0.559376
DEGS2	1.09588	0.379527
GSC	1.1211	0.22864
DUOX2	1.10425	0.323823
DLX5	1.12704	0.301445
TFAP2C	1.08794	0.737992
ALKAL2	0.874625	0.25645
FADD	1.15845	0.381049
IQCA1	1.0227	0.836114
SPATA8	0.77887	0.30588
CNGB1	1.08098	0.350412
CHST2	1.07154	0.565072
CEACAM20	1.10646	0.530373
CCDC160	0.887349	0.364584
SLC2A9	1.18455	0.282514
IQCM	1.01418	0.894461
SRRM3	1.14772	0.333631
PFN2	1.29507	0.134533
MISP	0.985315	0.900591
SPOCD1	1.12775	0.477967
LOXL2	0.71946	0.080527
COL5A3	0.983513	0.913386
GSTA3	0.960795	0.731355
CSF2	0.979509	0.82038
SMIM22	1.07112	0.454626
LDB3	0.982401	0.888444
MT1HL1	0.754557	0.149048
AQP7	1.04042	0.749685
KRT74	0.909591	0.54008
WNT7A	0.99979	0.998248
MT1B	1.11846	0.647448
CCL26	0.961714	0.727666
SOST	1.00275	0.967053
TPO	0.913605	0.562708
ADCY5	1.08864	0.371028
HCN1	0.704449	0.0182601
CILP	1.04008	0.640246
MICB	0.982216	0.890907
NCF2	1.64795	0.0145401
TFAP2A	0.770665	0.24392
COL12A1	0.838259	0.233913
PDZRN4	0.976147	0.79774
CYP2C19	0.849981	0.262434
RELN	1.12694	0.286045
TMEM252	1.04331	0.670246
H2BFWT	1.13612	0.295971
FLNC	1.04958	0.651627
CFAP65	1.02871	0.825171
FAT3	1.07607	0.461384
CPS1	0.882882	0.258407
SLC22A31	1.16906	0.162313
ZNF114	1.0642	0.658966
SLC52A1	0.921107	0.602261
C1orf68	1.05233	0.59954
DPP6	0.999434	0.995545
GABRD	1.27222	0.163854
SLC7A3	0.902003	0.323434
CILP2	0.853774	0.213629
ADAMTSL3	1.00161	0.985889
SHOX2	0.900031	0.423412
ELANE	0.917885	0.57622
TTC6	1.01156	0.891456
S100P	1.03797	0.645918
LGALS1	0.91222	0.537857
CAGE1	0.963537	0.844365
MEST	0.904415	0.557472
FAM3D	1.00683	0.925172
FCGR3A	1.25722	0.12331
MEX3A	0.734429	0.0350971
LMOD2	0.985303	0.926075
ABCA13	0.979804	0.823581
HIST3H2BB	1.03275	0.836737
LY6H	0.899104	0.326667
MROH2A	0.967683	0.727033
DEFA5	1.03268	0.877197
THSD1	1.11684	0.486112
IFIT1	1.05895	0.616065
IGFL3	1.00569	0.941807
COL4A4	1.09844	0.326098
PTGES	0.946957	0.708154
S100A3	1.00566	0.977204
2019-12-01	0.896849	0.319289
STRA6	0.960486	0.679891
MSC	1.07585	0.537899
GIPC2	1.07371	0.495027
EFNA2	0.803298	0.169491
KCNA7	1.01564	0.926919
LIM2	0.929083	0.597464
C1QL4	0.93462	0.629649
PMEPA1	0.848917	0.268761
SLC2A4	1.07291	0.479965
CYP27C1	0.961039	0.691456
RYR2	0.90302	0.362039
CSAG3	0.915194	0.190588
PLAC8	0.978052	0.807905
OPCML	1.04724	0.714008
CNKSR2	1.02361	0.797119
VXN	1.02726	0.821963
AOC1	1.07115	0.470625
PTGIS	1.0573	0.436678
ATP10B	1.33167	0.0220914
BGN	0.983424	0.914355
HIST1H3F	1.00001	0.999953
PGBD5	1.122	0.317378
CCDC196	0.931459	0.617688
PAEP	1.01572	0.818487
HEY1	0.970322	0.803872
PRAME	0.909162	0.139964
MAMDC2	0.97199	0.772816
POU6F2	0.852976	0.0332677
IQCF6	0.913817	0.642487
LCE1F	1.07087	0.40719
IFI6	1.10997	0.306615
KCNMA1	1.12057	0.2763
MUCL1	1.0842	0.179425
IL12RB2	0.978938	0.837572
HOXB7	1.25665	0.225416
GDF10	1.10691	0.419633
ANOS1	0.924601	0.523993
GBP5	1.02909	0.76184
IGF2BP3	0.984039	0.848554
CTSG	0.908759	0.481513
FRRS1L	1.0309	0.705618
GBP1	1.19339	0.17326
KYNU	1.18697	0.0984888
DDC	0.959712	0.67046
DLL3	0.867269	0.302616
TSPAN10	1.21091	0.255847
CCL7	0.960706	0.688423
C5orf46	1.15234	0.212657
HIST1H2AL	1.0676	0.732984
PPY	0.909192	0.67908
HS6ST3	1.14	0.117592
FAP	1.04699	0.728808
HOXC6	1.00472	0.975253
REG1B	0.990723	0.932734
HSPB7	1.10286	0.291081
WNT3A	0.910615	0.358731
TNFAIP6	0.926491	0.623719
KRT81	0.907973	0.335165
CXCL1	1.03265	0.768534
SOX11	0.810001	0.135649
CCL4L2	1.14409	0.321844
CCDC177	1.06541	0.531312
CYP4A11	1.09074	0.537159
AGTR1	1.03793	0.71246
LCE1C	1.02247	0.82315
MT1A	1.0177	0.821841
CEACAM16	0.910602	0.495916
MLN	0.955174	0.824791
MAGEA11	0.903735	0.0636757
KRT75	1.08356	0.314668
MMP1	0.981634	0.837563
APOC1	1.2336	0.138518
ATP1A2	1.0447	0.553702
FOXC2	1.13246	0.138324
TNIP3	0.920183	0.523232
FMO1	0.835285	0.233623
CA8	1.0354	0.688364
DLX1	0.898754	0.239509
C19orf81	1.28252	0.0156975
ZNF469	0.98217	0.900981
CSAG2	0.902331	0.248257
NPHS2	1.14652	0.436996
APOD	1.07829	0.397327
FZD10	1.1768	0.26187
NKX6-3	0.917877	0.508321
GNLY	1.13802	0.247896
FOXD1	0.930022	0.56078
STXBP6	0.892844	0.293496
TP73	1.02648	0.850336
CABYR	0.992363	0.948616
HIST1H2BI	1.23625	0.239043
SAMD5	1.05051	0.637173
SLCO1B3	0.950118	0.448649
FOXI3	0.911957	0.189291
SYCE3	0.847682	0.391343
PGM5	1.04773	0.592379
ZDHHC19	1.10137	0.518304
FAM221B	0.989841	0.935413
RXFP4	0.865015	0.429099
CALHM6	1.21487	0.154602
ZNF536	1.00293	0.976257
HIST1H2BL	1.12413	0.549566
SNCB	0.982903	0.861987
CROCC2	0.976789	0.84565
KREMEN2	0.898172	0.383192
COX6B2	0.767645	0.0557078
LRRIQ4	0.977537	0.852608
TCF15	1.24881	0.0405094
CLEC2B	1.01314	0.936181
MYOZ2	0.905776	0.498163
ADAMTS20	0.88794	0.195682
KCNQ2	0.753889	0.0785368
GPR148	0.848102	0.504731
AMIGO2	0.934924	0.626884
ALOX15	1.06545	0.401833
SLCO4C1	1.16156	0.0915841
SORCS1	1.01263	0.885096
SMKR1	1.19554	0.101751
C8A	0.896144	0.566903
UNC13C	0.921474	0.490869
DIRC1	0.89946	0.453647
SERPINE1	1.01626	0.892823
IFI27	1.25003	0.0984006
HIST1H2AE	1.29863	0.127939
STRIP2	1.10266	0.573832
GJB4	1.12149	0.35637
ACKR3	1.17503	0.150913
AIM2	1.06226	0.476263
CREG2	1.13947	0.225694
POU3F3	0.924758	0.410248
HIST1H1B	0.963828	0.827691
TRIM54	0.902424	0.349115
EGFL6	1.19064	0.298456
LKAAEAR1	1.14305	0.446713
FGF20	0.958848	0.782459
R3HDML	0.932204	0.678752
APOBEC4	0.780367	0.251006
MYT1L	0.956711	0.751156
HIST1H2BG	1.13615	0.440555
CLUL1	0.941336	0.510362
HKDC1	0.937125	0.543726
KISS1R	0.90502	0.406488
LYPD1	1.04277	0.784801
LRIT2	1.19578	0.178927
DMRT3	0.975032	0.759677
IFIT3	1.05253	0.643067
DGKK	0.917303	0.595888
HRASLS5	0.906193	0.230695
PLA2G2A	1.00934	0.893945
APOBEC3B	1.13691	0.384535
HIST1H2BH	0.808078	0.276283
COL5A2	0.917863	0.584217
IP6K3	1.11908	0.286915
CCL3	1.13389	0.364028
GCOM1	0.977444	0.815735
MAGEA6	0.920719	0.0762404
SLITRK6	0.882909	0.190911
GPR87	1.46889	0.115833
SLC38A11	0.946166	0.639558
HIST1H2AJ	1.15811	0.417935
PRUNE2	1.06911	0.410659
ADAM23	1.03661	0.689175
IL1A	0.968241	0.737579
P2RX3	0.872298	0.403566
RTL4	0.725858	0.262785
SAA1	0.98899	0.912273
ACP7	1.11742	0.264068
METTL27	0.971327	0.82813
COX6A2	0.64689	0.101922
ROS1	0.905393	0.250776
MTRNR2L5	0.638171	0.0675037
ZYG11A	1.00401	0.971401
ST8SIA2	0.960466	0.732609
HEPHL1	1.00802	0.924057
NRAP	1.00958	0.935578
ANO1	1.02387	0.803825
CHD5	1.02405	0.837389
CNTN5	0.940018	0.491106
CACNA1B	1.02257	0.794808
SOX15	1.18191	0.34856
IL24	0.939652	0.636257
SYT14	0.8332	0.108985
CYP4F2	1.00897	0.940011
BARX1	0.969515	0.68245
GCLM	1.07535	0.561837
SERPINE2	1.12025	0.377638
TRIM15	0.954563	0.680656
ADGRG7	0.934787	0.566588
VAX2	1.12312	0.374377
SMYD1	1.0117	0.905088
KLHDC7B	0.946037	0.485528
IGFL2	0.999214	0.992371
NRSN1	1.0365	0.778482
RSAD2	1.06822	0.481829
DCSTAMP	0.967338	0.747782
RIPPLY3	1.03162	0.763105
APOB	1.15527	0.221865
CDHR1	1.14473	0.177078
KCNG3	0.982101	0.861762
MAGEA3	0.911566	0.0461563
SCNN1B	1.09506	0.310764
MAPK8IP2	1.23277	0.0848809
AMTN	1.09207	0.246929
TNS4	0.880098	0.461636
RGS20	0.993179	0.954069
CARD17	1.04022	0.695185
MAGEA4	1.01182	0.7774
GABRB2	1.01805	0.84832
C17orf99	1.21144	0.246054
PTH2R	1.02601	0.690738
MAGEA10	0.985285	0.792415
MAGEA1	0.996459	0.941064
DOC2A	1.00703	0.953062
CHRNA1	0.82681	0.162175
TMPRSS15	0.932606	0.543905
TACR2	1.12282	0.261066
SIX2	1.02351	0.794629
CCL14	1.03148	0.758524
SH2D5	0.923142	0.435159
TNNI3	1.06097	0.537261
PPP1R14C	0.836056	0.287379
POMC	0.971636	0.703611
TBX15	0.943226	0.619731
SULF1	0.97488	0.853793
NPTX1	1.12057	0.215333
GPR152	0.984372	0.926629
TRHDE	1.03818	0.658267
SLC47A2	1.1529	0.205409
CHRDL1	1.06735	0.313621
PLN	1.10314	0.258148
RDH16	0.976398	0.854594
CNN1	1.12346	0.231509
P2RY6	1.0685	0.615237
COCH	0.981609	0.817985
HIST1H2BE	1.38817	0.0274625
GRIN3B	0.930672	0.545222
C1QTNF12	0.83505	0.126118
CXCL10	1.10884	0.220273
UCHL1	0.956119	0.52742
SYNPO2	1.05487	0.524332
CCDC74B	0.897314	0.370909
MFSD2A	1.09545	0.608184
MAT1A	0.992455	0.949949
GPR156	0.946507	0.602989
FBN2	0.865355	0.10078
MUC16	1.08458	0.321154
CLEC2L	0.912808	0.232252
HIST1H2BM	1.17531	0.262242
CEL	1.04349	0.662384
COL3A1	0.937443	0.617999
FOXL2NB	0.990873	0.906425
UGT1A1	1.02262	0.813125
ACKR1	1.05069	0.539841
SLCO6A1	1.09651	0.395011
B4GALNT4	1.00083	0.993108
DMP1	1.16963	0.334063
PAX4	0.924312	0.704158
UGT2B7	1.12686	0.249411
GBX2	0.953281	0.661735
GOLGA7B	1.10054	0.319775
HIST2H2AA3	1.63854	0.00402179
DMRT2	0.995311	0.948169
ANKRD18B	0.921036	0.397188
FADS2	0.889274	0.377089
LCE1E	1.08047	0.567048
OTX2	0.859038	0.111746
PSG5	0.907212	0.368363
TFPI2	0.819087	0.0734971
WNT7B	1.06904	0.670335
PALM2	0.806347	0.0898788
CECR2	1.09575	0.338548
SCUBE1	1.1125	0.221459
CST4	1.03075	0.79795
CNR1	1.03882	0.648204
LAMA1	0.948906	0.568608
PRR20G	0.977507	0.787537
KCNA2	1.03479	0.642572
PKHD1	1.01635	0.829097
GRM4	1.02295	0.846098
TESMIN	0.923153	0.57302
SEMA5B	1.03436	0.812594
BAMBI	0.948843	0.644919
TCHHL1	0.933119	0.478878
TGM7	1.02899	0.811963
HSPA6	1.2389	0.108077
ARTN	1.09986	0.448551
CFHR4	0.882273	0.191788
COL5A1	0.964164	0.785166
UCN3	0.670186	0.102727
IL36G	1.00252	0.971196
TRIM10	0.960301	0.743977
LMOD1	1.11785	0.221721
CXCL5	0.956472	0.621746
UTS2	1.02307	0.815621
SLC13A5	1.04433	0.565266
CD177	0.992023	0.90949
PSG9	0.845305	0.255489
CLCA2	1.20022	0.189416
HOXD12	0.910047	0.514356
KRT37	1.00917	0.939537
G6PC	1.03741	0.793387
EFCAB1	0.899369	0.382535
BCAT1	0.718097	0.0137791
FOLR3	1.17685	0.0989133
GTSF1	0.890058	0.0552332
CST2	1.07301	0.531059
IRX6	1.10473	0.178572
FNDC1	0.924684	0.541407
IGFBP3	1.28912	0.0578662
CGB8	0.894453	0.384854
SDK2	0.99087	0.929539
SLCO1B1	0.922709	0.368163
ODC1	0.903324	0.393298
EPO	0.870086	0.0869808
MS4A18	0.838025	0.472798
IL13RA2	0.852053	0.140612
LMO1	1.01458	0.877687
CXCL14	1.09415	0.331012
ARPP21	1.04693	0.716558
QRFPR	0.916234	0.207638
FGF19	1.03882	0.485067
EGR2	1.02705	0.813355
RGR	1.02879	0.85446
C9	0.912491	0.367604
TEX35	1.00109	0.993701
ELOVL3	0.974145	0.816987
PHF24	1.05663	0.573293
ZNF474	1.12377	0.320063
FAM83A	1.00845	0.922056
CHODL	1.01524	0.87197
BTG4	0.864765	0.319669
COL1A2	0.949964	0.695172
KRTAP19-1	1.00605	0.947676
TNFSF9	0.994261	0.964315
NKX1-2	0.991751	0.917738
SPHKAP	0.964649	0.770851
LRRC15	0.967116	0.710558
UCP1	0.941449	0.661896
GAST	1.01057	0.899092
TLX3	1.12608	0.0388725
ZG16	1.01429	0.921331
GFY	1.00373	0.981954
ALX4	0.936315	0.349181
GP9	0.943851	0.840825
SLC28A3	1.11126	0.369862
UBE2U	0.962006	0.687892
PPBP	1.02986	0.745337
SLC5A12	1.16797	0.204627
GATA3	0.905435	0.420535
ADAMDEC1	1.14455	0.279414
NIPAL4	1.16683	0.150469
MAGEA9B	1.04017	0.562297
NKX2-8	1.20342	0.062353
SPRR4	0.948899	0.460191
TG	1.16237	0.176
DNAH17	1.10586	0.397767
PCDHGC5	1.01787	0.841816
CASP14	0.991697	0.869954
FGF11	0.816642	0.121715
MAGEB6	0.823453	0.127608
HES2	1.06679	0.574667
ANKUB1	0.797817	0.178588
KLK4	1.11214	0.412064
MAGED4B	1.00429	0.97627
TGFBR3L	0.895878	0.368111
TMSB15A	0.916593	0.435965
C10orf120	1.07083	0.719074
MMD2	0.771119	0.195484
TCN1	0.926636	0.310852
DSC3	1.14179	0.347509
MC2R	0.75318	0.215816
HIST1H2AB	0.710903	0.106797
NUDT11	1.00152	0.988442
RXFP3	0.938826	0.707529
PLEKHS1	0.995085	0.956494
CD70	0.861904	0.188699
CFHR3	0.910037	0.343962
KRT86	0.94103	0.60106
CYP26B1	1.06871	0.58758
PLEKHG4B	0.983284	0.836743
GSC2	0.98156	0.908476
TP53AIP1	1.03195	0.747338
SPACA3	1.00397	0.983203
BNC1	1.13858	0.252482
TMEM105	0.942345	0.617584
TMEM270	1.05118	0.673349
KRTAP5-4	1.0049	0.974658
INHA	0.936257	0.520787
CCL3L1	1.05109	0.703827
TMEM155	1.19156	0.0508692
GLB1L3	0.994016	0.937117
CLDN24	1.23157	0.105295
NR1H4	0.937496	0.695646
NKX3-2	0.83371	0.141996
CLEC12A	1.03457	0.739681
SHISA2	0.958575	0.510546
DLX2	0.851506	0.0951002
LRAT	1.01357	0.868224
HTR7	1.01514	0.88172
WT1	0.984605	0.865922
LYPD8	0.897766	0.215509
LOXL4	0.941611	0.455855
OR11H6	1.24787	0.196967
KRT34	0.967988	0.793208
TSHB	0.870547	0.491595
EDN3	1.00694	0.931249
SLC6A2	1.04838	0.670186
HRG	1.2168	0.103736
NKX2-1	0.940182	0.610461
CHRNA9	1.00766	0.918321
SOX2	0.978493	0.768962
GYS2	0.877107	0.164915
AKR1C8P	1.01239	0.921523
ACTL8	1.03698	0.638512
CLEC12B	0.955555	0.653472
MOGAT2	0.939002	0.509001
SAGE1	0.897307	0.129539
SCN7A	0.967638	0.699583
ADGRD2	1.05608	0.6667
RHAG	0.756833	0.162366
CCL8	1.02219	0.850928
PAX3	0.880082	0.101973
HIST1H3C	1.07966	0.614373
SYT10	0.969107	0.797323
TP53TG3D	0.926954	0.483635
KRT5	1.21905	0.192218
CDH26	1.03286	0.774266
POU4F1	1.16475	0.0613634
MAP7D2	1.1601	0.0372625
KRTAP2-3	1.21264	0.0960236
KHDC1L	0.900927	0.232149
LCE2D	1.139	0.213727
LY6K	0.941865	0.524467
THEG	0.824278	0.0862061
COL22A1	0.91267	0.349094
PITX3	0.979667	0.8819
FAM133A	0.922531	0.252834
SERPINB7	0.967809	0.727272
FAM19A5	0.934785	0.514601
TNF	0.891736	0.346717
AC020922.1	0.822338	0.115074
LEMD1	0.875304	0.222077
PRDM13	0.897967	0.257746
CTAG2	0.988558	0.794628
MAGEC1	0.87078	0.0929946
GJD2	0.876079	0.376894
KRT82	1.11714	0.437313
HMX1	1.07732	0.314788
KHDC3L	1.13763	0.332256
DSC1	0.961879	0.674719
APOA4	1.04506	0.832778
CCDC144NL	0.888448	0.148988
HMGA2	0.841327	0.0807609
LCE2A	1.09662	0.385817
FAM181B	1.07347	0.444711
SPANXC	0.953592	0.637569
CXCL9	1.15668	0.114961
AJAP1	0.990185	0.9158
ZIC1	1.03535	0.573954
ENTHD1	1.04005	0.703659
GNG4	0.88239	0.14129
KLF14	0.844942	0.128086
SLCO1A2	0.895378	0.23742
VNN3	1.04271	0.617847
SPINK8	0.930454	0.531164
SIGLEC12	1.09918	0.45028
PADI3	0.9797	0.801294
TBX4	0.944481	0.570561
SEMG1	0.897394	0.52075
GLDC	1.04019	0.694362
FCN2	0.626154	0.131656
FABP9	1.08036	0.608264
LMX1B	1.10116	0.376619
MAGEC2	0.902372	0.232734
CD200R1L	1.10722	0.504082
TREML4	1.10946	0.417556
TMEM52B	1.01311	0.899624
CLLU1OS	1.04727	0.739341
PCDHGB1	1.09426	0.389633
XKR5	0.936703	0.447047
C19orf84	1.12932	0.249194
IDO1	1.13907	0.100823
SAA2	0.99547	0.961432
PAX7	0.972486	0.667094
KCNG1	1.00728	0.941021
CSAG1	0.944831	0.304427
ADD2	1.03897	0.667242
NKX2-4	0.898822	0.425843
CHIT1	0.991127	0.932741
MUC22	0.938431	0.375025
SPANXB1	0.893925	0.237908
SAA2-SAA4	0.892677	0.233782
DEFB4A	1.0322	0.586601
SLC35F3	0.908205	0.344293
LHX8	0.950146	0.520371
VCX3A	0.886471	0.369027
IL19	0.887224	0.190668
ANKK1	0.843225	0.246759
NGF	1.02445	0.817107
MESP2	1.11798	0.22885
ZNF280A	1.05353	0.550111
CT45A10	0.930764	0.359316
CLDN6	0.849408	0.131997
SERPINA9	0.983013	0.840397
CTAGE15	0.919194	0.333261
OR1F1	0.923311	0.526343
MEGF10	0.959939	0.719883
JAKMIP2	1.04541	0.606832
SOX1	1.00346	0.961653
MLIP	1.76261	4.01637e-05
LCE3D	1.04986	0.400913
ANKRD30B	0.83776	0.197499
PNLDC1	0.940119	0.421096
MAGEB2	0.90155	0.0937464
MAEL	0.949414	0.545254
PLPPR3	0.750543	0.0308218
CCDC185	0.984153	0.893117
IRX4	0.893348	0.174683
S100A12	1.09021	0.243804
GPR32	0.763191	0.239306
TMCO5A	1.14715	0.238395
IGFL4	0.945348	0.526525
HDGFL1	1.06172	0.556207
SIX3	1.00488	0.956717
CLEC1B	0.949081	0.649656
RPE65	0.869584	0.0735566
PRR9	1.05281	0.403087
PLA2G4E	1.03582	0.656862
AC010255.3	1.04107	0.805512
MAGEA9	1.00221	0.978553
AC011604.2	0.967927	0.775705
SLC5A7	1.01725	0.823484
LUZP2	0.912735	0.301632
SFRP4	1.05159	0.473062
FAM237A	0.93073	0.627581
RNF182	0.949005	0.588511
HTR2C	0.842778	0.028544
OPRK1	0.883715	0.146539
STRA8	0.99138	0.917171
RTP3	0.997514	0.977392
ELFN2	0.905126	0.352012
MPP4	0.940744	0.589535
OTP	1.01852	0.875809
ADGRE1	1.14684	0.200789
DEFB132	0.810118	0.482076
KCNS1	1.11784	0.328759
ZFP42	0.904245	0.278621
NR0B1	1.09379	0.102057
PAGE2B	0.709079	0.179552
LPA	1.14958	0.18247
ABCA4	1.09635	0.166071
KRT83	0.880163	0.283022
KRT77	0.899262	0.28969
FRG2	1.06363	0.66639
TARM1	0.860811	0.410091
TKTL1	1.11963	0.115811
H2BFM	1.14831	0.196786
ANKRD34B	0.851497	0.0879606
NTRK2	0.972186	0.646794
VWDE	0.892976	0.0876722
UPK1A	1.07732	0.321758
CT45A1	1.00818	0.898894
NEFM	0.998222	0.978813
OR7A5	1.02971	0.770569
ASB5	1.03713	0.622486
GLYATL1B	0.848555	0.289369
GCG	1.00463	0.97228
NETO1	0.829635	0.0556441
SPANXD	1.09794	0.241667
TEX19	1.29323	0.0908337
EPHA8	1.08873	0.456134
RNF17	1.00394	0.959241
LUZP4	0.751788	0.0646869
FAM178B	0.904155	0.216345
KRT14	1.07889	0.306612
VCX2	0.844069	0.286367
OBP2A	0.861428	0.18309
CST9	1.19586	0.191451
PF4V1	1.01991	0.898158
SFTA2	0.984251	0.840132
KRTAP5-6	0.720148	0.139951
CALB1	0.894773	0.105474
LRRC38	0.982264	0.842018
UGT2A1	0.972792	0.803577
MAL	1.02808	0.546171
SPRR2G	0.9936	0.920754
UGT1A8	1.14377	0.1634
SOHLH1	0.939433	0.466237
VCX	1.00644	0.94251
MSGN1	0.855237	0.312148
CYP4F11	1.11192	0.0939752
C10orf90	1.10649	0.3089
SPINK7	1.00485	0.931642
MMP8	0.954209	0.688987
CT45A5	0.875499	0.321058
CCDC194	1.13312	0.258495
C6orf15	0.905088	0.194446
DSCAM	0.888028	0.231205
SLC6A14	0.969426	0.718236
MYOD1	1.14639	0.395326
WFDC12	0.996426	0.959818
FABP4	1.00806	0.901757
SPAG11A	1.10092	0.618957
SERPINA12	0.865395	0.152733
SLC22A25	1.05214	0.617108
IGFN1	1.1012	0.234773
SLC35G4	0.715534	0.22728
IL36B	1.00465	0.953543
PCDH19	0.926916	0.288491
HOXC12	1.01967	0.773125
CYP26A1	0.991214	0.876062
BRDT	0.94814	0.374571
MYO3A	0.918169	0.216034
KRT4	1.00015	0.996873
CACNG4	0.999595	0.996199
MAGEA12	0.926001	0.145669
AC011473.4	1.05439	0.536749
FOXE1	0.979177	0.79521
LYZL4	1.02379	0.901108
SOHLH2	0.909633	0.251038
NHLH2	0.983714	0.83424
CLDN10	1.10785	0.122249
MYCL	1.08383	0.492174
PAGE2	0.781886	0.156999
DCC	0.929622	0.446841
[truncated: 65 more rows]
