# Supplementary material for: Genome-wide analysis of lncRNAs, miRNAs, and mRNAs forming a prognostic scoring system in esophageal squamous cell carcinoma
Source: PeerJ. 2020 Feb 10;8:e8368. doi: 10.7717/peerj.8368 (PMC7017795; doi:10.7717/peerj.8368)
Supplement: Table S4 [file peerj-08-8368-s005.xlsx]

## Sheet: Sheet1
Gene ontology analyses of the mRNAs in prognosis-related co-expression RNA network
Category	Term	Count	Percent	PValue	Genes
GOTERM_BP_FAT	GO:0050000~chromosome localization	2	5.71429	0.0241304	DLGAP5, KIF18A
GOTERM_BP_FAT	GO:0051303~establishment of chromosome localization	2	5.71429	0.0241304	DLGAP5, KIF18A
GOTERM_MF_FAT	GO:0004522~pancreatic ribonuclease activity	2	5.71429	0.0279872	RNASE4, ANG
GOTERM_MF_FAT	GO:0016892~endoribonuclease activity, producing 3'-phosphomonoesters	2	5.71429	0.0331507	RNASE4, ANG
GOTERM_BP_FAT	GO:0030071~regulation of mitotic metaphase/anaphase transition	2	5.71429	0.0352002	DLGAP5, BUB1
GOTERM_MF_FAT	GO:0016894~endonuclease activity, active with either ribo- or deoxyribonucleic acids and producing 3'-phosphomonoesters	2	5.71429	0.0433991	RNASE4, ANG
GOTERM_CC_FAT	GO:0000922~spindle pole	3	8.57143	0.00167778	DLGAP5, BUB1, TPX2
GOTERM_BP_FAT	GO:0007059~chromosome segregation	3	8.57143	0.00756843	DLGAP5, KIF18A, SKA1
GOTERM_BP_FAT	GO:0033043~regulation of organelle organization	3	8.57143	0.047941	DLGAP5, BUB1, SKA1
GOTERM_BP_FAT	GO:0010033~response to organic substance	5	14.2857	0.0271852	ANG, CTSC, SIK2, HTR2C, LIN28B
GOTERM_CC_FAT	GO:0005819~spindle	6	17.1429	5.35111e-06	KIF14, DLGAP5, BUB1, KIF18A, TPX2, SKA1
GOTERM_BP_FAT	GO:0000280~nuclear division	6	17.1429	2.28399e-05	DLGAP5, BUB1, KIF18A, TPX2, SKA1, PBK
GOTERM_BP_FAT	GO:0007067~mitosis	6	17.1429	2.28399e-05	DLGAP5, BUB1, KIF18A, TPX2, SKA1, PBK
GOTERM_BP_FAT	GO:0000087~M phase of mitotic cell cycle	6	17.1429	2.49083e-05	DLGAP5, BUB1, KIF18A, TPX2, SKA1, PBK
GOTERM_BP_FAT	GO:0048285~organelle fission	6	17.1429	2.76961e-05	DLGAP5, BUB1, KIF18A, TPX2, SKA1, PBK
GOTERM_BP_FAT	GO:0000279~M phase	6	17.1429	0.000154571	DLGAP5, BUB1, KIF18A, TPX2, SKA1, PBK
GOTERM_CC_FAT	GO:0015630~microtubule cytoskeleton	6	17.1429	0.00253722	KIF14, DLGAP5, BUB1, KIF18A, TPX2, SKA1
GOTERM_BP_FAT	GO:0000278~mitotic cell cycle	7	20	2.0689e-05	DLGAP5, BUB1, KIF18A, TPX2, SKA1, PBK, RHOU
GOTERM_BP_FAT	GO:0022403~cell cycle phase	7	20	3.89681e-05	DLGAP5, BUB1, KIF18A, TPX2, SKA1, PBK, RHOU
GOTERM_BP_FAT	GO:0022402~cell cycle process	7	20	0.000217429	DLGAP5, BUB1, KIF18A, TPX2, SKA1, PBK, RHOU
GOTERM_BP_FAT	GO:0007049~cell cycle	7	20	0.00117965	DLGAP5, BUB1, KIF18A, TPX2, SKA1, PBK, RHOU
GOTERM_MF_FAT	GO:0005524~ATP binding	7	20	0.0395273	KIF14, ATP10B, BUB1, KIF18A, TPX2, PBK, SIK2
GOTERM_MF_FAT	GO:0032559~adenyl ribonucleotide binding	7	20	0.0418493	KIF14, ATP10B, BUB1, KIF18A, TPX2, PBK, SIK2
GOTERM_CC_FAT	GO:0044430~cytoskeletal part	8	22.8571	0.0010563	KIF14, DLGAP5, BUB1, KIF18A, TPX2, SKA1, KRTAP4-1, RHOU
GOTERM_CC_FAT	GO:0005856~cytoskeleton	8	22.8571	0.00873483	KIF14, DLGAP5, BUB1, KIF18A, TPX2, SKA1, KRTAP4-1, RHOU
GOTERM_MF_FAT	GO:0032553~ribonucleotide binding	8	22.8571	0.0348196	KIF14, ATP10B, BUB1, KIF18A, TPX2, PBK, SIK2, RHOU
GOTERM_MF_FAT	GO:0032555~purine ribonucleotide binding	8	22.8571	0.0348196	KIF14, ATP10B, BUB1, KIF18A, TPX2, PBK, SIK2, RHOU
GOTERM_MF_FAT	GO:0017076~purine nucleotide binding	8	22.8571	0.0429457	KIF14, ATP10B, BUB1, KIF18A, TPX2, PBK, SIK2, RHOU
GOTERM_CC_FAT	GO:0043228~non-membrane-bounded organelle	10	28.5714	0.0298758	KIF14, ANG, DLGAP5, BUB1, KIF18A, TPX2, SKA1, KRTAP4-1, WDHD1, RHOU
GOTERM_CC_FAT	GO:0043232~intracellular non-membrane-bounded organelle	10	28.5714	0.0298758	KIF14, ANG, DLGAP5, BUB1, KIF18A, TPX2, SKA1, KRTAP4-1, WDHD1, RHOU
