# Supplementary material for: Genome-wide analysis of lncRNAs, miRNAs, and mRNAs forming a prognostic scoring system in esophageal squamous cell carcinoma
Source: PeerJ. 2020 Feb 10;8:e8368. doi: 10.7717/peerj.8368 (PMC7017795; doi:10.7717/peerj.8368)
Supplement: Table S6 [file peerj-08-8368-s007.xlsx]

## Sheet: Sheet1
prognostic Cox model parameters based on multiple types of RNA
	coef	exp(coef)	lower.0.95exp(coef)	upper.0.95exp(coef)	z	Pr(>|z|)
MLIP	0.3418	1.40747	0.98977	2.0015	1.903	0.057078	.
TNFSF10	0.05437	1.05588	0.59845	1.8629	0.188	0.851124
SIK2	-1.38365	0.25066	0.08254	0.7612	-2.441	0.014634	*
LINC01068	0.42895	1.53564	1.10587	2.1324	2.561	0.010446	*
LINC00601	0.34829	1.41664	1.00543	1.996	1.991	0.046491	*
TTTY14	0.2185	1.24421	0.93413	1.6572	1.494	0.13517
AC084262.1	-1.393	0.24833	0.11203	0.5505	-3.43	0.000604	***
LINC01415	-0.33364	0.71631	0.42777	1.1995	-1.268	0.20464
miR-5699-3p	1.06024	2.88705	1.30246	6.3995	2.611	0.009037	**
miR-552-5p	0.34784	1.41601	0.78475	2.555	1.155	0.248063
Signif. codes: 0 ‘***’ 0.001 ‘**’ 0.01 ‘*’ 0.05 ‘.’ 0.1 ‘ ’ 1
Likelihood ratio test= 61.67 on 10 df, p=2e-09
Wald test = 30.57 on 10 df, p=7e-04
Score (logrank) test = 52.8 on 10 df, p=8e-08
